# Supplementary material for: Early biomarkers in the presymptomatic phase of cognitive impairment: changes in the endocannabinoidome and serotonergic pathways in Alzheimer's-prone mice after mTBI
Source: Springer Nature journal article supplement (doi:10.1186/s40478-024-01820-0), 2024-07-12
Supplement: MOESM2 [file 40478_2024_1820_MOESM2_ESM.pdf]

1 2way ANOVA of stat Rit Frequency 15 D intergroup

|                                        |                         |         |                                     |                 |                   |
|----------------------------------------|-------------------------|---------|-------------------------------------|-----------------|-------------------|
| <b>Table Analyzed</b>                  | stat Rit Frequency 15 D |         |                                     |                 |                   |
| <b>Two-way ANOVA</b>                   | Ordinary                |         |                                     |                 |                   |
| <b>Alpha</b>                           | 0,05                    |         |                                     |                 |                   |
| <b>Source of Variation</b>             | % of total variation    | P value | P value summary                     | Significant?    |                   |
| <b>Interaction</b>                     | 11,25                   | 0,0163  | *                                   | Yes             |                   |
| <b>genotype</b>                        | 36,79                   | <0,0001 | ****                                | Yes             |                   |
| <b>injury</b>                          | 3,712                   | 0,1533  | ns                                  | No              |                   |
| <b>ANOVA table</b>                     | SS                      | DF      | MS                                  | F (DFn, DFd)    | P value           |
| <b>Interaction</b>                     | 69,03                   | 1       |                                     | 69,03           | F (1, 28) = 6,527 |
| <b>genotype</b>                        | 225,8                   | 1       |                                     | 225,8           | F (1, 28) = 21,35 |
| <b>injury</b>                          | 22,78                   | 1       |                                     | 22,78           | F (1, 28) = 2,154 |
| <b>Residual</b>                        | 296,1                   | 28      |                                     | 10,58           |                   |
| <b>Difference between column means</b> |                         |         |                                     |                 |                   |
| <b>Mean of sham</b>                    | 6,750                   |         |                                     |                 |                   |
| <b>Mean of mTBI</b>                    | 8,438                   |         |                                     |                 |                   |
| <b>Difference between means</b>        | -1,688                  |         |                                     |                 |                   |
| <b>SE of difference</b>                | 1,150                   |         |                                     |                 |                   |
| <b>95% CI of difference</b>            | -4,043 to 0,6677        |         |                                     |                 |                   |
| <b>Difference between row means</b>    |                         |         |                                     |                 |                   |
| <b>Mean of wt</b>                      | 4,938                   |         |                                     |                 |                   |
| <b>Mean of app</b>                     | 10,25                   |         |                                     |                 |                   |
| <b>Difference between means</b>        | -5,313                  |         |                                     |                 |                   |
| <b>SE of difference</b>                | 1,150                   |         |                                     |                 |                   |
| <b>95% CI of difference</b>            | -7,668 to -2,957        |         |                                     |                 |                   |
| <b>Interaction CI</b>                  |                         |         |                                     |                 |                   |
| <b>Mean diff, A1 - B1</b>              | -4,625                  |         |                                     |                 |                   |
| <b>Mean diff, A2 - B2</b>              | 1,250                   |         |                                     |                 |                   |
| <b>(A1 -B1) - (A2 - B2)</b>            | -5,875                  |         |                                     |                 |                   |
| <b>95% CI of difference</b>            | -10,59 to -1,165        |         |                                     |                 |                   |
| <b>(B1 - A1) - (B2 - A2)</b>           | 5,875                   |         |                                     |                 |                   |
| <b>95% CI of difference</b>            | 1,165 to 10,59          |         |                                     |                 |                   |
| <b>Normality of Residuals</b>          |                         |         |                                     |                 |                   |
| <b>Test name</b>                       | Statistics              | P value | Passed normality test (alpha=0,05)? | P value summary |                   |
| <b>D'Agostino-Pearson omnibus (K2)</b> | 33,12                   | <0,0001 | No                                  | ****            |                   |
| <b>Anderson-Darling (A2*)</b>          | 1,691                   | 0,0002  | No                                  | ***             |                   |
| <b>Shapiro-Wilk (W)</b>                | 0,8018                  | <0,0001 | No                                  | ****            |                   |
| <b>Kolmogorov-Smirnov (distance)</b>   | 0,2166                  | 0,0005  | No                                  | ***             |                   |
| <b>Data summary</b>                    |                         |         |                                     |                 |                   |
| <b>Number of columns (injury)</b>      | 2                       |         |                                     |                 |                   |

|                                  |    |  |  |  |  |
|----------------------------------|----|--|--|--|--|
| <b>Number of rows (genotype)</b> | 2  |  |  |  |  |
| <b>Number of values</b>          | 32 |  |  |  |  |

|                              | WT-sham | WT-mTBI | APP-sham | APP-mTBI |
|------------------------------|---------|---------|----------|----------|
| Test for normal distribution |         |         |          |          |
| D'Agostino & Pearson test    |         |         |          |          |
| K2                           | 10,93   | 4,078   | 1,235    | 1,925    |
| P value                      | 0,0042  | 0,1302  | 0,5393   | 0,3819   |
| Passed n/No                  | Yes     | Yes     | Yes      | Yes      |
| P value st **                | ns      | ns      | ns       | ns       |
| Anderson-Darling test        |         |         |          |          |
| A2*                          | 1,175   | 0,4708  | 0,4      | 0,6169   |
| P value                      | 0,0019  | 0,1744  | 0,2736   | 0,069    |
| Passed n/No                  | Yes     | Yes     | Yes      | Yes      |
| P value st **                | ns      | ns      | ns       | ns       |
| Shapiro-Wilk test            |         |         |          |          |
| W                            | 0,6756  | 0,868   | 0,894    | 0,8443   |
| P value                      | 0,0012  | 0,1439  | 0,2547   | 0,0834   |
| Passed n/No                  | Yes     | Yes     | Yes      | Yes      |
| P value st **                | ns      | ns      | ns       | ns       |
| Kolmogorov-Smirnov test      |         |         |          |          |
| KS distan                    | 0,3472  | 0,2602  | 0,2224   | 0,2372   |
| P value                      | 0,0052  | >0,1000 | >0,1000  | >0,1000  |
| Passed n/No                  | Yes     | Yes     | Yes      | Yes      |
| P value st **                | ns      | ns      | ns       | ns       |
| Number of'                   | 8       | 8       | 8        | 8        |

2. 2way ANOVA of stat Rit Duration 15 D intergroup

| <b>Table Analyzed</b>                  | stat Rit Duration 15 D |         |                 |                    |          |
|----------------------------------------|------------------------|---------|-----------------|--------------------|----------|
| <b>Two-way ANOVA</b>                   | Ordinary               |         |                 |                    |          |
| <b>Alpha</b>                           | 0,05                   |         |                 |                    |          |
| <b>Source of Variation</b>             | % of total variation   | P value | P value summary | Significant?       |          |
| <b>Interaction</b>                     | 21,01                  | 0,0066  | **              | Yes                |          |
| <b>WT/APP</b>                          | 0,9237                 | 0,5437  | ns              | No                 |          |
| <b>Model</b>                           | 9,630                  | 0,0570  | ns              | No                 |          |
| <b>ANOVA table</b>                     | SS                     | DF      | MS              | F (DFn, DFd)       | P value  |
| <b>Interaction</b>                     | 2493                   | 1       | 2493            | F (1, 28) = 8,594  | P=0,0066 |
| <b>WT/APP</b>                          | 109,6                  | 1       | 109,6           | F (1, 28) = 0,3779 | P=0,5437 |
| <b>Model</b>                           | 1143                   | 1       | 1143            | F (1, 28) = 3,940  | P=0,0570 |
| <b>Residual</b>                        | 8120                   | 28      | 290,0           |                    |          |
| <b>Difference between column means</b> |                        |         |                 |                    |          |
| <b>Mean of sham</b>                    | 28,57                  |         |                 |                    |          |
| <b>Mean of mTBI</b>                    | 40,53                  |         |                 |                    |          |
| <b>Difference between means</b>        | -11,95                 |         |                 |                    |          |
| <b>SE of difference</b>                | 6,021                  |         |                 |                    |          |
| <b>95% CI of difference</b>            | -24,28 to 0,3821       |         |                 |                    |          |
| <b>Difference between row means</b>    |                        |         |                 |                    |          |
| <b>Mean of wt</b>                      | 32,70                  |         |                 |                    |          |
| <b>Mean of app</b>                     | 36,40                  |         |                 |                    |          |
| <b>Difference between means</b>        | -3,701                 |         |                 |                    |          |
| <b>SE of difference</b>                | 6,021                  |         |                 |                    |          |
| <b>95% CI of difference</b>            | -16,03 to 8,632        |         |                 |                    |          |
| <b>Interaction CI</b>                  |                        |         |                 |                    |          |
| <b>Mean diff, A1 - B1</b>              | -29,60                 |         |                 |                    |          |
| <b>Mean diff, A2 - B2</b>              | 5,700                  |         |                 |                    |          |
| <b>(A1 - B1) - (A2 - B2)</b>           | -35,30                 |         |                 |                    |          |
| <b>95% CI of difference</b>            | -59,97 to -10,64       |         |                 |                    |          |
| <b>(B1 - A1) - (B2 - A2)</b>           | 35,30                  |         |                 |                    |          |
| <b>95% CI of difference</b>            | 10,64 to 59,97         |         |                 |                    |          |
| <b>Data summary</b>                    |                        |         |                 |                    |          |
| <b>Number of columns (Model)</b>       | 2                      |         |                 |                    |          |

|                                |    |  |  |  |  |
|--------------------------------|----|--|--|--|--|
| <b>Number of rows (WT/APP)</b> | 2  |  |  |  |  |
| <b>Number of values</b>        | 32 |  |  |  |  |

WT-sham WT-mTBI APP-sham APP-mTBI

Test for normal distribution

D'Agostino & Pearson test

|               |        |        |        |        |
|---------------|--------|--------|--------|--------|
| K2            | 1,906  | 0,6978 | 2,644  | 0,6657 |
| P value       | 0,3856 | 0,7055 | 0,2666 | 0,7169 |
| Passed n/Yes  | Yes    | Yes    | Yes    | Yes    |
| P value st ns | ns     | ns     | ns     | ns     |

Anderson-Darling test

|               |        |        |        |        |
|---------------|--------|--------|--------|--------|
| A2*           | 0,3602 | 0,1865 | 0,7888 | 0,2527 |
| P value       | 0,3497 | 0,8598 | 0,0229 | 0,6276 |
| Passed n/Yes  | Yes    | No     | Yes    | Yes    |
| P value st ns | ns     | *      | ns     | ns     |

Shapiro-Wilk test

|               |        |        |        |        |
|---------------|--------|--------|--------|--------|
| W             | 0,9112 | 0,9593 | 0,8078 | 0,9436 |
| P value       | 0,3628 | 0,8034 | 0,0346 | 0,6463 |
| Passed n/Yes  | Yes    | No     | Yes    | Yes    |
| P value st ns | ns     | *      | ns     | ns     |

Kolmogorov-Smirnov test

|               |         |         |        |         |
|---------------|---------|---------|--------|---------|
| KS distan     | 0,2374  | 0,1518  | 0,3295 | 0,1733  |
| P value       | >0,1000 | >0,1000 | 0,0108 | >0,1000 |
| Passed n/Yes  | Yes     | No      | Yes    | Yes     |
| P value st ns | ns      | *       | ns     | ns      |

Number of 8 8 8 8

3. 2way ANOVA of stat Rit Latency 15 D intergroup

| 3. 2way ANOVA of stat Rit Latency 15 D intergroup |                       |         |                                     |                   |          |
|---------------------------------------------------|-----------------------|---------|-------------------------------------|-------------------|----------|
| <b>Table Analyzed</b>                             | stat Rit Latency 15 D |         |                                     |                   |          |
| <b>Two-way ANOVA</b>                              | Ordinary              |         |                                     |                   |          |
| <b>Alpha</b>                                      | 0,05                  |         |                                     |                   |          |
| <b>Source of Variation</b>                        | % of total variation  | P value | P value summary                     | Significant?      |          |
| <b>Interaction</b>                                | 10,54                 | 0,0063  | **                                  | Yes               |          |
| <b>wt or ko</b>                                   | 26,99                 | <0,0001 | ****                                | Yes               |          |
| <b>tipe of injury</b>                             | 28,64                 | <0,0001 | ****                                | Yes               |          |
| <b>ANOVA table</b>                                | SS                    | DF      | MS                                  | F (DFn, DFd)      | P value  |
| <b>Interaction</b>                                | 10706                 | 1       | 10706                               | F (1, 28) = 8,725 | P=0,0063 |
| <b>wt or ko</b>                                   | 27407                 | 1       | 27407                               | F (1, 28) = 22,34 | P<0,0001 |
| <b>tipe of injury</b>                             | 29083                 | 1       | 29083                               | F (1, 28) = 23,70 | P<0,0001 |
| <b>Residual</b>                                   | 34354                 | 28      | 1227                                |                   |          |
| <b>Difference between column means</b>            |                       |         |                                     |                   |          |
| <b>Mean of sham</b>                               | 100,7                 |         |                                     |                   |          |
| <b>Mean of mTBI</b>                               | 40,40                 |         |                                     |                   |          |
| <b>Difference between means</b>                   | 60,29                 |         |                                     |                   |          |
| <b>SE of difference</b>                           | 12,38                 |         |                                     |                   |          |
| <b>95% CI of difference</b>                       | 34,93 to 85,66        |         |                                     |                   |          |
| <b>Difference between row means</b>               |                       |         |                                     |                   |          |
| <b>Mean of wt</b>                                 | 99,81                 |         |                                     |                   |          |
| <b>Mean of app</b>                                | 41,28                 |         |                                     |                   |          |
| <b>Difference between means</b>                   | 58,53                 |         |                                     |                   |          |
| <b>SE of difference</b>                           | 12,38                 |         |                                     |                   |          |
| <b>95% CI of difference</b>                       | 33,16 to 83,90        |         |                                     |                   |          |
| <b>Interaction CI</b>                             |                       |         |                                     |                   |          |
| <b>Mean diff, A1 - B1</b>                         | 96,88                 |         |                                     |                   |          |
| <b>Mean diff, A2 - B2</b>                         | 23,71                 |         |                                     |                   |          |
| <b>(A1 -B1) - (A2 - B2)</b>                       | 73,16                 |         |                                     |                   |          |
| <b>95% CI of difference</b>                       | 22,43 to 123,9        |         |                                     |                   |          |
| <b>(B1 - A1) - (B2 - A2)</b>                      | -73,16                |         |                                     |                   |          |
| <b>95% CI of difference</b>                       | -123,9 to -22,43      |         |                                     |                   |          |
| <b>Normality of Residuals</b>                     |                       |         |                                     |                   |          |
| <b>Test name</b>                                  | Statistics            | P value | Passed normality test (alpha=0,05)? | P value summary   |          |
| <b>D'Agostino-Pearson omnibus (K2)</b>            | 1,498                 | 0,4728  | Yes                                 | ns                |          |
| <b>Anderson-Darling (A2*)</b>                     | 1,029                 | 0,0090  | No                                  | **                |          |
| <b>Shapiro-Wilk (W)</b>                           | 0,9385                | 0,0679  | Yes                                 | ns                |          |
| <b>Kolmogorov-Smirnov (distance)</b>              | 0,1770                | 0,0122  | No                                  | *                 |          |
| <b>Data summary</b>                               |                       |         |                                     |                   |          |
| <b>Number of columns (tipe of injury)</b>         | 2                     |         |                                     |                   |          |

|                                  |    |  |  |  |  |
|----------------------------------|----|--|--|--|--|
| <b>Number of rows (wt or ko)</b> | 2  |  |  |  |  |
| <b>Number of values</b>          | 32 |  |  |  |  |

WT-sham WT-mTBI APP-sham APP-mTBI

Test for normal distribution

D'Agostino & Pearson test

|            |        |        |        |        |
|------------|--------|--------|--------|--------|
| K2         | 0,5863 | 1,455  | 0,7054 | 2,755  |
| P value    | 0,7459 | 0,4831 | 0,7028 | 0,2522 |
| Passed n   | Yes    | Yes    | Yes    | Yes    |
| P value st | ns     | ns     | ns     | ns     |

Anderson-Darling test

|            |        |        |        |        |
|------------|--------|--------|--------|--------|
| A2*        | 0,4308 | 0,3399 | 0,1648 | 0,8397 |
| P value    | 0,2254 | 0,3956 | 0,906  | 0,0166 |
| Passed n   | Yes    | Yes    | Yes    | No     |
| P value st | ns     | ns     | ns     | *      |

Shapiro-Wilk test

|            |        |        |        |        |
|------------|--------|--------|--------|--------|
| W          | 0,9164 | 0,9204 | 0,9663 | 0,7877 |
| P value    | 0,4013 | 0,4328 | 0,8677 | 0,0211 |
| Passed n   | Yes    | Yes    | Yes    | No     |
| P value st | ns     | ns     | ns     | *      |

Kolmogorov-Smirnov test

|            |        |         |         |        |
|------------|--------|---------|---------|--------|
| KS distan  | 0,2712 | 0,2095  | 0,1407  | 0,2852 |
| P value    | 0,0853 | >0,1000 | >0,1000 | 0,0543 |
| Passed n   | Yes    | Yes     | Yes     | Yes    |
| P value st | ns     | ns      | ns      | ns     |

|           |   |   |   |   |
|-----------|---|---|---|---|
| Number of | 8 | 8 | 8 | 8 |
|-----------|---|---|---|---|

4. 2way ANOVA of Y-maze 30 d and 60 d intergroup

|                                          |                      |         |                 |                    |          |
|------------------------------------------|----------------------|---------|-----------------|--------------------|----------|
| <b>Table Analyzed</b>                    | Y-maze 30 d and 60 d |         |                 |                    |          |
| <b>Two-way RM ANOVA</b>                  | Matching: Stacked    |         |                 |                    |          |
| <b>Assume sphericity?</b>                | Yes                  |         |                 |                    |          |
| <b>Alpha</b>                             | 0,05                 |         |                 |                    |          |
| <b>Source of Variation</b>               | % of total variation | P value | P value summary | Significant?       |          |
| <b>Time x Column Factor</b>              | 4,856                | 0,4036  | ns              | No                 |          |
| <b>Time</b>                              | 0,1928               | 0,7315  | ns              | No                 |          |
| <b>Column Factor</b>                     | 1,729                | 0,8007  | ns              | No                 |          |
| <b>Subject</b>                           | 48,29                | 0,4251  | ns              | No                 |          |
| <b>ANOVA table</b>                       | SS                   | DF      | MS              | F (DFn, DFd)       | P value  |
| <b>Time x Column Factor</b>              | 392,9                | 3       | 131,0           | F (3, 28) = 1,009  | P=0,4036 |
| <b>Time</b>                              | 15,60                | 1       | 15,60           | F (1, 28) = 0,1202 | P=0,7315 |
| <b>Column Factor</b>                     | 139,9                | 3       | 46,63           | F (3, 28) = 0,3342 | P=0,8007 |
| <b>Subject</b>                           | 3908                 | 28      | 139,6           | F (28, 28) = 1,075 | P=0,4251 |
| <b>Residual</b>                          | 3636                 | 28      | 129,9           |                    |          |
| <b>Difference between row means</b>      |                      |         |                 |                    |          |
| <b>Mean of 30</b>                        | 64,32                |         |                 |                    |          |
| <b>Mean of 60</b>                        | 65,31                |         |                 |                    |          |
| <b>Difference between means</b>          | -0,9875              |         |                 |                    |          |
| <b>SE of difference</b>                  | 2,849                |         |                 |                    |          |
| <b>95% CI of difference</b>              | -6,823 to 4,848      |         |                 |                    |          |
| <b>Data summary</b>                      |                      |         |                 |                    |          |
| <b>Number of columns (Column Factor)</b> | 4                    |         |                 |                    |          |
| <b>Number of rows (Time)</b>             | 2                    |         |                 |                    |          |
| <b>Number of subjects (Subject)</b>      | 32                   |         |                 |                    |          |
| <b>Number of missing values</b>          | 0                    |         |                 |                    |          |

WT-sham 3 WT-Sham 6 WT-mTBI 3( WT-mTBI 6( APP-Sham 3 APP-Sham 6 APP-mTBI 3 APP-mTBI 6

Test for normal distribution

D'Agostino & Pearson test

|               |       |        |        |        |        |        |        |        |
|---------------|-------|--------|--------|--------|--------|--------|--------|--------|
| K2            | 2,679 | 0,6738 | 2,753  | 1,42   | 1,319  | 2,383  | 0,7214 | 1,175  |
| P value       | 0,262 | 0,714  | 0,2525 | 0,4917 | 0,5172 | 0,3037 | 0,6972 | 0,5558 |
| Passed n/Yes  | Yes   | Yes    | Yes    | Yes    | Yes    | Yes    | Yes    | Yes    |
| P value st ns | ns    | ns     | ns     | ns     | ns     | ns     | ns     | ns     |

Anderson-Darling test

|               |        |        |        |        |        |        |        |        |
|---------------|--------|--------|--------|--------|--------|--------|--------|--------|
| A2*           | 0,4159 | 0,2514 | 0,4396 | 0,4711 | 0,2226 | 0,6829 | 0,2055 | 0,412  |
| P value       | 0,2476 | 0,6321 | 0,2132 | 0,174  | 0,7403 | 0,0452 | 0,8011 | 0,2539 |
| Passed n/Yes  | Yes    | Yes    | Yes    | Yes    | No     | Yes    | Yes    | Yes    |
| P value st ns | ns     | ns     | ns     | ns     | *      | ns     | ns     | ns     |

Shapiro-Wilk test

|               |        |        |        |        |        |        |        |        |
|---------------|--------|--------|--------|--------|--------|--------|--------|--------|
| W             | 0,8865 | 0,9564 | 0,905  | 0,8644 | 0,9669 | 0,8191 | 0,955  | 0,8988 |
| P value       | 0,2169 | 0,7755 | 0,3203 | 0,1328 | 0,873  | 0,0457 | 0,7615 | 0,2817 |
| Passed n/Yes  | Yes    | Yes    | Yes    | Yes    | No     | Yes    | Yes    | Yes    |
| P value st ns | ns     | ns     | ns     | ns     | *      | ns     | ns     | ns     |

Kolmogorov-Smirnov test

|               |         |         |         |         |         |        |         |         |
|---------------|---------|---------|---------|---------|---------|--------|---------|---------|
| KS distan     | 0,2234  | 0,1972  | 0,2372  | 0,205   | 0,189   | 0,2824 | 0,1502  | 0,2376  |
| P value       | >0,1000 | >0,1000 | >0,1000 | >0,1000 | >0,1000 | 0,0597 | >0,1000 | >0,1000 |
| Passed n/Yes  | Yes     | Yes     | Yes     | Yes     | Yes     | Yes    | Yes     | Yes     |
| P value st ns | ns      | ns      | ns      | ns      | ns      | ns     | ns      | ns      |

Number of 8 8 8 8 8 8 8 8 8



5. 2way ANOVA of Y-maze FORCED\_latency 30-60D intergroup

|                                          |                              |         |                 |                    |          |
|------------------------------------------|------------------------------|---------|-----------------|--------------------|----------|
| <b>Table Analyzed</b>                    | Y-maze FORCED_latency 30-60D |         |                 |                    |          |
| <b>Two-way RM ANOVA</b>                  | Matching: Stacked            |         |                 |                    |          |
| <b>Assume sphericity?</b>                | Yes                          |         |                 |                    |          |
| <b>Alpha</b>                             | 0,05                         |         |                 |                    |          |
| <b>Source of Variation</b>               | % of total variation         | P value | P value summary | Significant?       |          |
| <b>Time x Column Factor</b>              | 27,93                        | <0,0001 | ****            | Yes                |          |
| <b>Time</b>                              | 0,2183                       | 0,5902  | ns              | No                 |          |
| <b>Column Factor</b>                     | 24,11                        | 0,0004  | ***             | Yes                |          |
| <b>Subject</b>                           | 27,15                        | 0,2345  | ns              | No                 |          |
| <b>ANOVA table</b>                       | SS                           | DF      | MS              | F (DFn, DFd)       | P value  |
| <b>Time x Column Factor</b>              | 4072                         | 3       | 1357            | F (3, 28) = 12,66  | P<0,0001 |
| <b>Time</b>                              | 31,82                        | 1       | 31,82           | F (1, 28) = 0,2968 | P=0,5902 |
| <b>Column Factor</b>                     | 3514                         | 3       | 1171            | F (3, 28) = 8,287  | P=0,0004 |
| <b>Subject</b>                           | 3958                         | 28      | 141,4           | F (28, 28) = 1,319 | P=0,2345 |
| <b>Residual</b>                          | 3002                         | 28      | 107,2           |                    |          |
| <b>Difference between row means</b>      |                              |         |                 |                    |          |
| <b>Mean of 30</b>                        | 11,88                        |         |                 |                    |          |
| <b>Mean of 60</b>                        | 13,29                        |         |                 |                    |          |
| <b>Difference between means</b>          | -1,410                       |         |                 |                    |          |
| <b>SE of difference</b>                  | 2,589                        |         |                 |                    |          |
| <b>95% CI of difference</b>              | -6,713 to 3,892              |         |                 |                    |          |
| <b>Data summary</b>                      |                              |         |                 |                    |          |
| <b>Number of columns (Column Factor)</b> | 4                            |         |                 |                    |          |
| <b>Number of rows (Time)</b>             | 2                            |         |                 |                    |          |
| <b>Number of subjects (Subject)</b>      | 32                           |         |                 |                    |          |
| <b>Number of missing values</b>          | 0                            |         |                 |                    |          |

WT-sham 3 WT-Sham 6 WT-mTBI 3( WT-mTBI 6( APP-Sham 3 APP-Sham 6 APP-mTBI 3 APP-mTBI 6

Test for normal distribution

D'Agostino & Pearson test

|               |        |        |        |        |        |        |        |         |
|---------------|--------|--------|--------|--------|--------|--------|--------|---------|
| K2            | 12,12  | 16,87  | 3,586  | 1,328  | 12,34  | 6,566  | 8,02   | 21,51   |
| P value       | 0,0023 | 0,0002 | 0,1665 | 0,5149 | 0,0021 | 0,0375 | 0,0181 | <0,0001 |
| Passed n/No   | No     | Yes    | Yes    | No     | No     | No     | No     | No      |
| P value st ** | ***    | ns     | ns     | **     | *      | *      | ****   | ****    |

Anderson-Darling test

|              |        |        |        |        |        |        |        |         |
|--------------|--------|--------|--------|--------|--------|--------|--------|---------|
| A2*          | 0,7332 | 1,231  | 0,6284 | 0,3612 | 0,8482 | 1,483  | 0,6157 | 1,755   |
| P value      | 0,0327 | 0,0014 | 0,0641 | 0,3477 | 0,0157 | 0,0003 | 0,0696 | <0,0001 |
| Passed n/No  | No     | Yes    | Yes    | No     | No     | Yes    | No     | No      |
| P value st * | **     | ns     | ns     | *      | ***    | ns     | ****   | ****    |

Shapiro-Wilk test

|              |        |        |        |        |        |        |        |         |
|--------------|--------|--------|--------|--------|--------|--------|--------|---------|
| W            | 0,7884 | 0,6567 | 0,8216 | 0,8952 | 0,7766 | 0,6301 | 0,8317 | 0,5361  |
| P value      | 0,0215 | 0,0007 | 0,0485 | 0,2616 | 0,016  | 0,0004 | 0,0619 | <0,0001 |
| Passed n/No  | No     | No     | Yes    | No     | No     | Yes    | No     | No      |
| P value st * | ***    | *      | ns     | *      | ***    | ns     | ****   | ****    |

Kolmogorov-Smirnov test

|               |         |        |         |         |         |        |        |        |
|---------------|---------|--------|---------|---------|---------|--------|--------|--------|
| KS distan     | 0,2417  | 0,3039 | 0,255   | 0,2248  | 0,255   | 0,4237 | 0,2929 | 0,4001 |
| P value       | >0,1000 | 0,0284 | >0,1000 | >0,1000 | >0,1000 | 0,0001 | 0,0419 | 0,0004 |
| Passed n/Yes  | No      | Yes    | Yes     | Yes     | No      | No     | No     | No     |
| P value st ns | *       | ns     | ns      | ns      | ***     | *      | ***    | ***    |

Number of 8 8 8 8 8 8 8 8 8



6. 2way ANOVA of Y-maze FORCED\_Duration 30-60D intergroup

| 6. 2way ANOVA of Y-maze FORCED_Duration 30-60D intergroup |                               |         |                 |                    |          |
|-----------------------------------------------------------|-------------------------------|---------|-----------------|--------------------|----------|
| <b>Table Analyzed</b>                                     | Y-maze FORCED_Duration 30-60D |         |                 |                    |          |
| <b>Two-way RM ANOVA</b>                                   | Matching: Stacked             |         |                 |                    |          |
| <b>Assume sphericity?</b>                                 | Yes                           |         |                 |                    |          |
| <b>Alpha</b>                                              | 0,05                          |         |                 |                    |          |
| <b>Source of Variation</b>                                | % of total variation          | P value | P value summary | Significant?       |          |
| <b>Time x Column Factor</b>                               | 8,507                         | 0,0067  | **              | Yes                |          |
| <b>Time</b>                                               | 25,63                         | <0,0001 | ****            | Yes                |          |
| <b>Column Factor</b>                                      | 31,65                         | <0,0001 | ****            | Yes                |          |
| <b>Subject</b>                                            | 18,30                         | 0,3569  | ns              | No                 |          |
| <b>ANOVA table</b>                                        | SS                            | DF      | MS              | F (DFn, DFd)       | P value  |
| <b>Time x Column Factor</b>                               | 2010                          | 3       | 670,0           | F (3, 28) = 4,990  | P=0,0067 |
| <b>Time</b>                                               | 6057                          | 1       | 6057            | F (1, 28) = 45,11  | P<0,0001 |
| <b>Column Factor</b>                                      | 7477                          | 3       | 2492            | F (3, 28) = 16,14  | P<0,0001 |
| <b>Subject</b>                                            | 4324                          | 28      | 154,4           | F (28, 28) = 1,150 | P=0,3569 |
| <b>Residual</b>                                           | 3759                          | 28      | 134,3           |                    |          |
| <b>Difference between row means</b>                       |                               |         |                 |                    |          |
| <b>Mean of 30</b>                                         | 35,47                         |         |                 |                    |          |
| <b>Mean of 60</b>                                         | 16,02                         |         |                 |                    |          |
| <b>Difference between means</b>                           | 19,46                         |         |                 |                    |          |
| <b>SE of difference</b>                                   | 2,897                         |         |                 |                    |          |
| <b>95% CI of difference</b>                               | 13,52 to 25,39                |         |                 |                    |          |
| <b>Data summary</b>                                       |                               |         |                 |                    |          |
| <b>Number of columns (Column Factor)</b>                  | 4                             |         |                 |                    |          |
| <b>Number of rows (Time)</b>                              | 2                             |         |                 |                    |          |
| <b>Number of subjects (Subject)</b>                       | 32                            |         |                 |                    |          |
| <b>Number of missing values</b>                           | 0                             |         |                 |                    |          |

WT-sham 3 WT-Sham 6 WT-mTBI 3( WT-mTBI 6( APP-Sham 3 APP-Sham 6 APP-mTBI 3 APP-mTBI 6

Test for normal distribution

D'Agostino & Pearson test

|               |        |        |        |        |        |       |        |         |
|---------------|--------|--------|--------|--------|--------|-------|--------|---------|
| K2            | 0,1594 | 0,1181 | 1,561  | 3,937  | 0,9235 | 4,325 | 0,4407 | 21,4    |
| P value       | 0,9234 | 0,9427 | 0,4583 | 0,1397 | 0,6302 | 0,115 | 0,8022 | <0,0001 |
| Passed n(Yes  | Yes    | Yes    | Yes    | Yes    | Yes    | Yes   | Yes    | No      |
| P value st ns | ns     | ns     | ns     | ns     | ns     | ns    | ns     | ****    |

Anderson-Darling test

|               |        |        |        |        |        |        |        |         |
|---------------|--------|--------|--------|--------|--------|--------|--------|---------|
| A2*           | 0,1571 | 0,1605 | 0,3721 | 0,7254 | 0,3025 | 1,552  | 0,2461 | 1,848   |
| P value       | 0,9208 | 0,9142 | 0,3252 | 0,0344 | 0,4943 | 0,0002 | 0,6518 | <0,0001 |
| Passed n(Yes  | Yes    | Yes    | No     | Yes    | No     | Yes    | Yes    | No      |
| P value st ns | ns     | ns     | *      | ns     | ***    | ns     | ns     | ****    |

Shapiro-Wilk test

|               |        |        |        |        |        |        |        |         |
|---------------|--------|--------|--------|--------|--------|--------|--------|---------|
| W             | 0,979  | 0,9716 | 0,8925 | 0,7985 | 0,9324 | 0,6211 | 0,9428 | 0,5192  |
| P value       | 0,9579 | 0,91   | 0,2468 | 0,0276 | 0,5381 | 0,0003 | 0,6387 | <0,0001 |
| Passed n(Yes  | Yes    | Yes    | No     | Yes    | No     | Yes    | Yes    | No      |
| P value st ns | ns     | ns     | *      | ns     | ***    | ns     | ns     | ****    |

Kolmogorov-Smirnov test

|               |         |         |         |         |         |         |         |        |
|---------------|---------|---------|---------|---------|---------|---------|---------|--------|
| KS distan     | 0,1314  | 0,131   | 0,1885  | 0,2546  | 0,2132  | 0,44    | 0,154   | 0,3787 |
| P value       | >0,1000 | >0,1000 | >0,1000 | >0,1000 | >0,1000 | <0,0001 | >0,1000 | 0,0012 |
| Passed n(Yes  | Yes     | Yes     | Yes     | Yes     | Yes     | No      | Yes     | No     |
| P value st ns | ns      | ns      | ns      | ns      | ns      | ****    | ns      | **     |

Number of 8 8 8 8 8 8 8 8 8



7. 2way ANOVA of OF Travelling (primi 5 min) 30-60D intergroup

| 7. 2way ANOVA of OF Travelling (primi 5 min) 30-60D intergroup |                                    |         |                 |                    |          |
|----------------------------------------------------------------|------------------------------------|---------|-----------------|--------------------|----------|
| <b>Table Analyzed</b>                                          | OF Travelling (primi 5 min) 30-60D |         |                 |                    |          |
| <b>Two-way RM ANOVA</b>                                        | Matching: Stacked                  |         |                 |                    |          |
| <b>Assume sphericity?</b>                                      | Yes                                |         |                 |                    |          |
| <b>Alpha</b>                                                   | 0,05                               |         |                 |                    |          |
| <b>Source of Variation</b>                                     | % of total variation               | P value | P value summary | Significant?       |          |
| <b>Time x Column Factor</b>                                    | 3,126                              | 0,1523  | ns              | No                 |          |
| <b>Time</b>                                                    | 3,600                              | 0,0160  | *               | Yes                |          |
| <b>Column Factor</b>                                           | 44,22                              | <0,0001 | ****            | Yes                |          |
| <b>Subject</b>                                                 | 33,71                              | 0,0208  | *               | Yes                |          |
| <b>ANOVA table</b>                                             | SS                                 | DF      | MS              | F (DFn, DFd)       | P value  |
| <b>Time x Column Factor</b>                                    | 1732997                            | 3       | 577666          | F (3, 28) = 1,901  | P=0,1523 |
| <b>Time</b>                                                    | 1995788                            | 1       | 1995788         | F (1, 28) = 6,569  | P=0,0160 |
| <b>Column Factor</b>                                           | 24517259                           | 3       | 8172420         | F (3, 28) = 12,24  | P<0,0001 |
| <b>Subject</b>                                                 | 18687491                           | 28      | 667410          | F (28, 28) = 2,197 | P=0,0208 |
| <b>Residual</b>                                                | 8506473                            | 28      | 303803          |                    |          |
| <b>Difference between row means</b>                            |                                    |         |                 |                    |          |
| <b>Mean of 30</b>                                              | 1926                               |         |                 |                    |          |
| <b>Mean of 60</b>                                              | 2279                               |         |                 |                    |          |
| <b>Difference between means</b>                                | -353,2                             |         |                 |                    |          |
| <b>SE of difference</b>                                        | 137,8                              |         |                 |                    |          |
| <b>95% CI of difference</b>                                    | -635,4 to -70,92                   |         |                 |                    |          |
| <b>Data summary</b>                                            |                                    |         |                 |                    |          |
| <b>Number of columns (Column Factor)</b>                       | 4                                  |         |                 |                    |          |
| <b>Number of rows (Time)</b>                                   | 2                                  |         |                 |                    |          |
| <b>Number of subjects (Subject)</b>                            | 32                                 |         |                 |                    |          |
| <b>Number of missing values</b>                                | 0                                  |         |                 |                    |          |

WT-sham 3 WT-Sham 6 WT-mTBI 3( WT-mTBI 6( APP-Sham 3 APP-Sham 6 APP-mTBI 3 APP-mTBI 6

Test for normal distribution

D'Agostino & Pearson test

|               |        |        |        |        |        |       |        |        |
|---------------|--------|--------|--------|--------|--------|-------|--------|--------|
| K2            | 2,934  | 0,1069 | 0,4349 | 0,7351 | 0,4067 | 1,783 | 13,35  | 3,372  |
| P value       | 0,2306 | 0,948  | 0,8046 | 0,6924 | 0,816  | 0,41  | 0,0013 | 0,1853 |
| Passed n/Yes  | Yes    | Yes    | Yes    | Yes    | Yes    | Yes   | No     | Yes    |
| P value st ns | ns     | ns     | ns     | ns     | ns     | ns    | **     | ns     |

Anderson-Darling test

|               |        |        |        |        |        |        |        |        |
|---------------|--------|--------|--------|--------|--------|--------|--------|--------|
| A2*           | 0,3399 | 0,2826 | 0,2311 | 0,2482 | 0,2303 | 0,2363 | 0,8635 | 0,5294 |
| P value       | 0,3955 | 0,5347 | 0,7086 | 0,6438 | 0,7115 | 0,6887 | 0,0142 | 0,1186 |
| Passed n/Yes  | Yes    | Yes    | Yes    | Yes    | Yes    | Yes    | No     | Yes    |
| P value st ns | ns     | ns     | ns     | ns     | ns     | ns     | *      | ns     |

Shapiro-Wilk test

|               |        |        |        |        |        |        |        |        |
|---------------|--------|--------|--------|--------|--------|--------|--------|--------|
| W             | 0,9006 | 0,9359 | 0,9478 | 0,9528 | 0,9449 | 0,9406 | 0,7514 | 0,8816 |
| P value       | 0,2923 | 0,5716 | 0,6895 | 0,7393 | 0,6599 | 0,6169 | 0,0085 | 0,1951 |
| Passed n/Yes  | Yes    | Yes    | Yes    | Yes    | Yes    | Yes    | No     | Yes    |
| P value st ns | ns     | ns     | ns     | ns     | ns     | ns     | **     | ns     |

Kolmogorov-Smirnov test

|               |         |         |         |         |         |         |         |         |
|---------------|---------|---------|---------|---------|---------|---------|---------|---------|
| KS distan     | 0,1636  | 0,1689  | 0,1579  | 0,1616  | 0,1452  | 0,1365  | 0,2641  | 0,2617  |
| P value       | >0,1000 | >0,1000 | >0,1000 | >0,1000 | >0,1000 | >0,1000 | >0,1000 | >0,1000 |
| Passed n/Yes  | Yes     | Yes     | Yes     | Yes     | Yes     | Yes     | Yes     | Yes     |
| P value st ns | ns      | ns      | ns      | ns      | ns      | ns      | ns      | ns      |

Number of 8 8 8 8 8 8 8 8 8



8. 2way ANOVA of OFT time in center % primi 10 min 30-60D intergroup

|                                          |                                          |         |                 |                      |          |
|------------------------------------------|------------------------------------------|---------|-----------------|----------------------|----------|
| <b>Table Analyzed</b>                    | OFT time in center % primi 10 min 30-60D |         |                 |                      |          |
| <b>Two-way RM ANOVA</b>                  | Matching: Stacked                        |         |                 |                      |          |
| <b>Assume sphericity?</b>                | Yes                                      |         |                 |                      |          |
| <b>Alpha</b>                             | 0,05                                     |         |                 |                      |          |
| <b>Source of Variation</b>               | % of total variation                     | P value | P value summary | Significant?         |          |
| <b>Time x Column Factor</b>              | 0,4184                                   | 0,9250  | ns              | No                   |          |
| <b>Time</b>                              | 0,002467                                 | 0,9585  | ns              | No                   |          |
| <b>Column Factor</b>                     | 40,98                                    | <0,0001 | ****            | Yes                  |          |
| <b>Subject</b>                           | 33,55                                    | 0,2220  | ns              | No                   |          |
| <b>ANOVA table</b>                       | SS                                       | DF      | MS              | F (DFn, DFd)         | P value  |
| <b>Time x Column Factor</b>              | 2,867                                    | 3       | 0,9555          | F (3, 28) = 0,1559   | P=0,9250 |
| <b>Time</b>                              | 0,01690                                  | 1       | 0,01690         | F (1, 28) = 0,002758 | P=0,9585 |
| <b>Column Factor</b>                     | 280,7                                    | 3       | 93,58           | F (3, 28) = 11,40    | P<0,0001 |
| <b>Subject</b>                           | 229,9                                    | 28      | 8,210           | F (28, 28) = 1,340   | P=0,2220 |
| <b>Residual</b>                          | 171,6                                    | 28      | 6,128           |                      |          |
| <b>Difference between row means</b>      |                                          |         |                 |                      |          |
| <b>Mean of 30</b>                        | 7,958                                    |         |                 |                      |          |
| <b>Mean of 60</b>                        | 7,990                                    |         |                 |                      |          |
| <b>Difference between means</b>          | -0,03250                                 |         |                 |                      |          |
| <b>SE of difference</b>                  | 0,6189                                   |         |                 |                      |          |
| <b>95% CI of difference</b>              | -1,300 to 1,235                          |         |                 |                      |          |
| <b>Data summary</b>                      |                                          |         |                 |                      |          |
| <b>Number of columns (Column Factor)</b> | 4                                        |         |                 |                      |          |
| <b>Number of rows (Time)</b>             | 2                                        |         |                 |                      |          |
| <b>Number of subjects (Subject)</b>      | 32                                       |         |                 |                      |          |
| <b>Number of missing values</b>          | 0                                        |         |                 |                      |          |

WT-sham 3 WT-Sham 6 WT-mTBI 3( WT-mTBI 6( APP-Sham 3 APP-Sham 6 APP-mTBI 3 APP-mTBI 6

Test for normal distribution

D'Agostino & Pearson test

|               |       |        |        |        |       |       |        |        |
|---------------|-------|--------|--------|--------|-------|-------|--------|--------|
| K2            | 1,697 | 0,5699 | 2,365  | 1,388  | 1,065 | 2,163 | 1,119  | 7,277  |
| P value       | 0,428 | 0,7521 | 0,3065 | 0,4995 | 0,587 | 0,339 | 0,5715 | 0,0263 |
| Passed n/Yes  | Yes   | Yes    | Yes    | Yes    | Yes   | Yes   | Yes    | No     |
| P value st ns | ns    | ns     | ns     | ns     | ns    | ns    | ns     | *      |

Anderson-Darling test

|               |        |        |        |        |        |        |        |        |
|---------------|--------|--------|--------|--------|--------|--------|--------|--------|
| A2*           | 0,3792 | 0,229  | 0,3674 | 0,2693 | 0,2245 | 0,389  | 0,3084 | 0,9561 |
| P value       | 0,3113 | 0,7163 | 0,3347 | 0,5714 | 0,7333 | 0,2931 | 0,4775 | 0,0079 |
| Passed n/Yes  | Yes    | Yes    | Yes    | Yes    | Yes    | Yes    | Yes    | No     |
| P value st ns | ns     | ns     | ns     | ns     | ns     | ns     | ns     | **     |

Shapiro-Wilk test

|               |        |        |        |        |        |        |        |        |
|---------------|--------|--------|--------|--------|--------|--------|--------|--------|
| W             | 0,8997 | 0,9469 | 0,9074 | 0,9279 | 0,943  | 0,9238 | 0,9545 | 0,7445 |
| P value       | 0,2873 | 0,6804 | 0,3363 | 0,4971 | 0,6412 | 0,4618 | 0,7563 | 0,0071 |
| Passed n/Yes  | Yes    | Yes    | Yes    | Yes    | Yes    | Yes    | Yes    | No     |
| P value st ns | ns     | ns     | ns     | ns     | ns     | ns     | ns     | **     |

Kolmogorov-Smirnov test

|               |         |         |         |         |         |         |         |        |
|---------------|---------|---------|---------|---------|---------|---------|---------|--------|
| KS distan     | 0,1956  | 0,1341  | 0,224   | 0,173   | 0,1687  | 0,2182  | 0,1955  | 0,3499 |
| P value       | >0,1000 | >0,1000 | >0,1000 | >0,1000 | >0,1000 | >0,1000 | >0,1000 | 0,0046 |
| Passed n/Yes  | Yes     | Yes     | Yes     | Yes     | Yes     | Yes     | Yes     | No     |
| P value st ns | ns      | ns      | ns      | ns      | ns      | ns      | ns      | **     |

Number of ' 8 8 8 8 8 8 8 8 8



9 2way ANOVA of NOR 30-60D 1

| Within each row, compare columns (simple effects within rows) |            |                    |                  |             |    |    |       |       |
|---------------------------------------------------------------|------------|--------------------|------------------|-------------|----|----|-------|-------|
| Number of families                                            | 2          |                    |                  |             |    |    |       |       |
| Number of comparisons per family                              | 3          |                    |                  |             |    |    |       |       |
| Alpha                                                         | 0,05       |                    |                  |             |    |    |       |       |
| Dunnett's multiple comparisons test                           | Mean Diff, | 95,00% CI of diff, | Below threshold? | Summary     |    |    |       |       |
| <b>30</b>                                                     |            |                    |                  |             |    |    |       |       |
| WT-sham vs. WT-mTBI                                           | 0,2100     | -0,01609 to 0,4361 | No               | ns          |    |    |       |       |
| WT-sham vs. APP-sham                                          | 0,1082     | -0,1179 to 0,3343  | No               | ns          |    |    |       |       |
| WT-sham vs. APP-mTBI                                          | 0,1132     | -0,1129 to 0,3393  | No               | ns          |    |    |       |       |
| <b>60</b>                                                     |            |                    |                  |             |    |    |       |       |
| WT-sham vs. WT-mTBI                                           | 0,5710     | 0,3448 to 0,7971   | Yes              | ****        |    |    |       |       |
| WT-sham vs. APP-sham                                          | 0,1875     | -0,03861 to 0,4136 | No               | ns          |    |    |       |       |
| WT-sham vs. APP-mTBI                                          | 0,2401     | 0,01400 to 0,4662  | Yes              | *           |    |    |       |       |
| Test details                                                  | Mean 1     | Mean 2             | Mean Diff,       | SE of diff, | N1 | N2 | q     | DF    |
| <b>30</b>                                                     |            |                    |                  |             |    |    |       |       |
| WT-sham vs. WT-mTBI                                           | 0,3794     | 0,1694             | 0,2100           | 0,09365     | 8  | 8  | 2,243 | 56,00 |
| WT-sham vs. APP-sham                                          | 0,3794     | 0,2713             | 0,1082           | 0,09365     | 8  | 8  | 1,155 | 56,00 |
| WT-sham vs. APP-mTBI                                          | 0,3794     | 0,2663             | 0,1132           | 0,09365     | 8  | 8  | 1,209 | 56,00 |
| <b>60</b>                                                     |            |                    |                  |             |    |    |       |       |
| WT-sham vs. WT-mTBI                                           | 0,3963     | -0,1747            | 0,5710           | 0,09365     | 8  | 8  | 6,097 | 56,00 |
| WT-sham vs. APP-sham                                          | 0,3963     | 0,2088             | 0,1875           | 0,09365     | 8  | 8  | 2,002 | 56,00 |
| WT-sham vs. APP-mTBI                                          | 0,3963     | 0,1561             | 0,2401           | 0,09365     | 8  | 8  | 2,564 | 56,00 |

WT-sham 3 WT-Sham 6 WT-mTBI 3( WT-mTBI 6( APP-Sham 3 APP-Sham 6 APP-mTBI 3 APP-mTBI 6

Test for normal distribution

D'Agostino & Pearson test

|               |        |        |        |        |        |        |         |        |
|---------------|--------|--------|--------|--------|--------|--------|---------|--------|
| K2            | 3,883  | 4,519  | 2,675  | 0,6672 | 7,396  | 3,235  | 0,05592 | 3,365  |
| P value       | 0,1435 | 0,1044 | 0,2625 | 0,7163 | 0,0248 | 0,1984 | 0,9724  | 0,1859 |
| Passed n( Yes | Yes    | Yes    | Yes    | No     | Yes    | Yes    | Yes     | Yes    |
| P value st ns | ns     | ns     | ns     | *      | ns     | ns     | ns      | ns     |

Anderson-Darling test

|               |        |        |        |        |        |        |        |        |
|---------------|--------|--------|--------|--------|--------|--------|--------|--------|
| A2*           | 0,449  | 0,709  | 0,4098 | 0,2534 | 0,5313 | 0,3173 | 0,2808 | 0,3409 |
| P value       | 0,2007 | 0,0382 | 0,2573 | 0,6248 | 0,117  | 0,4529 | 0,5391 | 0,3932 |
| Passed n( Yes | No     | Yes    | Yes    | Yes    | Yes    | Yes    | Yes    | Yes    |
| P value st ns | *      | ns     | ns     | ns     | ns     | ns     | ns     | ns     |

Shapiro-Wilk test

|               |        |        |        |        |        |        |        |        |
|---------------|--------|--------|--------|--------|--------|--------|--------|--------|
| W             | 0,8856 | 0,8181 | 0,8966 | 0,9516 | 0,8657 | 0,9199 | 0,9471 | 0,9151 |
| P value       | 0,2127 | 0,0446 | 0,2694 | 0,727  | 0,1367 | 0,429  | 0,6817 | 0,3914 |
| Passed n( Yes | No     | Yes    | Yes    | Yes    | Yes    | Yes    | Yes    | Yes    |
| P value st ns | *      | ns     | ns     | ns     | ns     | ns     | ns     | ns     |

Kolmogorov-Smirnov test

|               |         |        |         |         |         |         |         |         |
|---------------|---------|--------|---------|---------|---------|---------|---------|---------|
| KS distan     | 0,2393  | 0,2722 | 0,2079  | 0,2159  | 0,24    | 0,1618  | 0,1704  | 0,2065  |
| P value       | >0,1000 | 0,0828 | >0,1000 | >0,1000 | >0,1000 | >0,1000 | >0,1000 | >0,1000 |
| Passed n( Yes | Yes     | Yes    | Yes     | Yes     | Yes     | Yes     | Yes     | Yes     |
| P value st ns | ns      | ns     | ns      | ns      | ns      | ns      | ns      | ns      |

Number of ' 8 8 8 8 8 8 8 8 8



10 2way ANOVA of NOR 30-60D 24h intergroup

| 10 2way ANOVA of NOR 30-60D 24h intergroup                    |            |                    |                  |             |    |    |        |       |  |
|---------------------------------------------------------------|------------|--------------------|------------------|-------------|----|----|--------|-------|--|
| Within each row, compare columns (simple effects within rows) |            |                    |                  |             |    |    |        |       |  |
| Number of families                                            | 2          |                    |                  |             |    |    |        |       |  |
| Number of comparisons per family                              | 3          |                    |                  |             |    |    |        |       |  |
| Alpha                                                         | 0,05       |                    |                  |             |    |    |        |       |  |
| Dunnett's multiple comparisons test                           | Mean Diff, | 95,00% CI of diff, | Below threshold? | Summary     |    |    |        |       |  |
| <b>30</b>                                                     |            |                    |                  |             |    |    |        |       |  |
| WT-sham vs. WT-mTBI                                           | 0,1011     | -0,1928 to 0,3950  | No               | ns          |    |    |        |       |  |
| WT-sham vs. APP-sham                                          | -0,02431   | -0,3182 to 0,2696  | No               | ns          |    |    |        |       |  |
| WT-sham vs. APP-mTBI                                          | 0,2557     | -0,03822 to 0,5496 | No               | ns          |    |    |        |       |  |
| <b>60</b>                                                     |            |                    |                  |             |    |    |        |       |  |
| WT-sham vs. WT-mTBI                                           | 0,3446     | 0,05066 to 0,6385  | Yes              | *           |    |    |        |       |  |
| WT-sham vs. APP-sham                                          | 0,08928    | -0,2046 to 0,3832  | No               | ns          |    |    |        |       |  |
| WT-sham vs. APP-mTBI                                          | 0,09365    | -0,2003 to 0,3876  | No               | ns          |    |    |        |       |  |
| Test details                                                  | Mean 1     | Mean 2             | Mean Diff,       | SE of diff, | N1 | N2 | q      | DF    |  |
| <b>30</b>                                                     |            |                    |                  |             |    |    |        |       |  |
| WT-sham vs. WT-mTBI                                           | 0,1594     | 0,05838            | 0,1011           | 0,1217      | 8  | 8  | 0,8303 | 56,00 |  |
| WT-sham vs. APP-sham                                          | 0,1594     | 0,1838             | -0,02431         | 0,1217      | 8  | 8  | 0,1997 | 56,00 |  |
| WT-sham vs. APP-mTBI                                          | 0,1594     | -0,09625           | 0,2557           | 0,1217      | 8  | 8  | 2,101  | 56,00 |  |
| <b>60</b>                                                     |            |                    |                  |             |    |    |        |       |  |
| WT-sham vs. WT-mTBI                                           | 0,2149     | -0,1297            | 0,3446           | 0,1217      | 8  | 8  | 2,831  | 56,00 |  |
| WT-sham vs. APP-sham                                          | 0,2149     | 0,1256             | 0,08928          | 0,1217      | 8  | 8  | 0,7335 | 56,00 |  |
| WT-sham vs. APP-mTBI                                          | 0,2149     | 0,1213             | 0,09365          | 0,1217      | 8  | 8  | 0,7694 | 56,00 |  |

WT-sham 3 WT-Sham 6 WT-mTBI 3( WT-mTBI 6( APP-Sham 3 APP-Sham 6 APP-mTBI 3 APP-mTBI 6

Test for normal distribution

D'Agostino & Pearson test

|               |        |        |        |        |        |        |        |        |
|---------------|--------|--------|--------|--------|--------|--------|--------|--------|
| K2            | 1,05   | 1,466  | 0,403  | 0,8877 | 0,4505 | 3,345  | 3,763  | 0,2435 |
| P value       | 0,5915 | 0,4805 | 0,8175 | 0,6416 | 0,7983 | 0,1878 | 0,1523 | 0,8854 |
| Passed n/ Yes | Yes    | Yes    | Yes    | Yes    | Yes    | Yes    | Yes    | Yes    |
| P value st ns | ns     | ns     | ns     | ns     | ns     | ns     | ns     | ns     |

Anderson-Darling test

|               |        |        |        |        |        |        |        |        |
|---------------|--------|--------|--------|--------|--------|--------|--------|--------|
| A2*           | 0,2164 | 0,2732 | 0,236  | 0,3762 | 0,1464 | 0,562  | 0,537  | 0,1336 |
| P value       | 0,7631 | 0,5598 | 0,6897 | 0,317  | 0,941  | 0,0982 | 0,1153 | 0,962  |
| Passed n/ Yes | Yes    | Yes    | Yes    | Yes    | Yes    | Yes    | Yes    | Yes    |
| P value st ns | ns     | ns     | ns     | ns     | ns     | ns     | ns     | ns     |

Shapiro-Wilk test

|               |        |        |        |        |        |        |        |        |
|---------------|--------|--------|--------|--------|--------|--------|--------|--------|
| W             | 0,9471 | 0,9245 | 0,965  | 0,8935 | 0,9753 | 0,873  | 0,878  | 0,9813 |
| P value       | 0,6819 | 0,4673 | 0,8561 | 0,2524 | 0,9358 | 0,1611 | 0,1804 | 0,969  |
| Passed n/ Yes | Yes    | Yes    | Yes    | Yes    | Yes    | Yes    | Yes    | Yes    |
| P value st ns | ns     | ns     | ns     | ns     | ns     | ns     | ns     | ns     |

Kolmogorov-Smirnov test

|               |         |         |         |         |         |         |        |         |
|---------------|---------|---------|---------|---------|---------|---------|--------|---------|
| KS distan     | 0,1428  | 0,1542  | 0,1764  | 0,2053  | 0,1216  | 0,2496  | 0,2726 | 0,1151  |
| P value       | >0,1000 | >0,1000 | >0,1000 | >0,1000 | >0,1000 | >0,1000 | 0,0818 | >0,1000 |
| Passed n/ Yes | Yes     | Yes     | Yes     | Yes     | Yes     | Yes     | Yes    | Yes     |
| P value st ns | ns      | ns      | ns      | ns      | ns      | ns      | ns     | ns      |

Number of ' 8 8 8 8 8 8 8 8 8



2way ANOVA of Ab1-42 cortex

| Table Analyzed                         | Ab1-42 cortex        |         |                                     |                  |                 |
|----------------------------------------|----------------------|---------|-------------------------------------|------------------|-----------------|
| <b>Two-way ANOVA</b>                   | Ordinary             |         |                                     |                  |                 |
| <b>Alpha</b>                           | 0,05                 |         |                                     |                  |                 |
| <b>Source of Variation</b>             | % of total variation | P value | P value summary                     |                  | Significant?    |
| <b>Interaction</b>                     | 47,55                | 0,0015  | **                                  |                  | Yes             |
| <b>Injury</b>                          | 2,382                | 0,3213  | ns                                  |                  | No              |
| <b>Genotype</b>                        | 33,02                | 0,0043  | **                                  |                  | Yes             |
| <b>ANOVA table</b>                     | SS                   | DF      | MS                                  | F (DFn, DFd)     | P value         |
| <b>Interaction</b>                     | 0,1323               | 1       | 0,1323                              | F (1, 8) = 22.31 | P=0.0015        |
| <b>Injury</b>                          | 0,006627             | 1       | 0,006627                            | F (1, 8) = 1.118 | P=0.3213        |
| <b>Genotype</b>                        | 0,09188              | 1       | 0,09188                             | F (1, 8) = 15.49 | P=0.0043        |
| <b>Residual</b>                        | 0,04744              | 8       | 0,005930                            |                  |                 |
| <b>Difference between column means</b> |                      |         |                                     |                  |                 |
| <b>Mean of WT</b>                      | 0,4658               |         |                                     |                  |                 |
| <b>Mean of APP-SWE</b>                 | 0,6408               |         |                                     |                  |                 |
| <b>Difference between means</b>        | -0,1750              |         |                                     |                  |                 |
| <b>SE of difference</b>                | 0,04446              |         |                                     |                  |                 |
| <b>95% CI of difference</b>            | -0.2775 to -0.07247  |         |                                     |                  |                 |
| <b>Difference between row means</b>    |                      |         |                                     |                  |                 |
| <b>Mean of Sham</b>                    | 0,5298               |         |                                     |                  |                 |
| <b>Mean of mTBI</b>                    | 0,5768               |         |                                     |                  |                 |
| <b>Difference between means</b>        | -0,04700             |         |                                     |                  |                 |
| <b>SE of difference</b>                | 0,04446              |         |                                     |                  |                 |
| <b>95% CI of difference</b>            | -0.1495 to 0.05553   |         |                                     |                  |                 |
| <b>Interaction CI</b>                  |                      |         |                                     |                  |                 |
| <b>Mean diff, A1 - B1</b>              | 0,03500              |         |                                     |                  |                 |
| <b>Mean diff, A2 - B2</b>              | -0,3850              |         |                                     |                  |                 |
| <b>(A1 -B1) - (A2 - B2)</b>            | 0,4200               |         |                                     |                  |                 |
| <b>95% CI of difference</b>            | 0.2149 to 0.6251     |         |                                     |                  |                 |
| <b>(B1 - A1) - (B2 - A2)</b>           | -0,4200              |         |                                     |                  |                 |
| <b>95% CI of difference</b>            | -0.6251 to -0.2149   |         |                                     |                  |                 |
| <b>Normality of Residuals</b>          |                      |         |                                     |                  |                 |
| <b>Test name</b>                       | Statistics           | P value | Passed normality test (alpha=0.05)? |                  | P value summary |
| <b>D'Agostino-Pearson omnibus (K2)</b> | 3,171                | 0,2049  | Yes                                 |                  | ns              |
| <b>Anderson-Darling (A2*)</b>          | 0,5666               | 0,1123  | Yes                                 |                  | ns              |
| <b>Shapiro-Wilk (W)</b>                | 0,9184               | 0,2730  | Yes                                 |                  | ns              |
| <b>Kolmogorov-Smirnov (distance)</b>   | 0,1975               | 0,1000  | Yes                                 |                  | ns              |
| <b>Data summary</b>                    |                      |         |                                     |                  |                 |

|                                     |    |  |  |  |  |
|-------------------------------------|----|--|--|--|--|
| <b>Number of columns (Genotype)</b> | 2  |  |  |  |  |
| <b>Number of rows (Injury)</b>      | 2  |  |  |  |  |
| <b>Number of values</b>             | 12 |  |  |  |  |

2way ANOVA of Ab1-42 hipp

| Table Analyzed                         | Ab1-42 hipp          |         |                                     |                  |                 |
|----------------------------------------|----------------------|---------|-------------------------------------|------------------|-----------------|
| <b>Two-way ANOVA</b>                   | Ordinary             |         |                                     |                  |                 |
| <b>Alpha</b>                           | 0,05                 |         |                                     |                  |                 |
| <b>Source of Variation</b>             | % of total variation | P value | P value summary                     |                  | Significant?    |
| <b>Interaction</b>                     | 18,52                | 0,0587  | ns                                  |                  | No              |
| <b>Injury</b>                          | 3,936                | 0,3395  | ns                                  |                  | No              |
| <b>Genotype</b>                        | 47,02                | 0,0080  | **                                  |                  | Yes             |
| <b>ANOVA table</b>                     | SS                   | DF      | MS                                  | F (DFn, DFd)     | P value         |
| <b>Interaction</b>                     | 0,01031              | 1       | 0,01031                             | F (1, 8) = 4.853 | P=0.0587        |
| <b>Injury</b>                          | 0,002192             | 1       | 0,002192                            | F (1, 8) = 1.032 | P=0.3395        |
| <b>Genotype</b>                        | 0,02619              | 1       | 0,02619                             | F (1, 8) = 12.32 | P=0.0080        |
| <b>Residual</b>                        | 0,01700              | 8       | 0,002125                            |                  |                 |
| <b>Difference between column means</b> |                      |         |                                     |                  |                 |
| <b>Mean of WT</b>                      | 0,1922               |         |                                     |                  |                 |
| <b>Mean of APP-SWE</b>                 | 0,09873              |         |                                     |                  |                 |
| <b>Difference between means</b>        | 0,09343              |         |                                     |                  |                 |
| <b>SE of difference</b>                | 0,02662              |         |                                     |                  |                 |
| <b>95% CI of difference</b>            | 0.03205 to 0.1548    |         |                                     |                  |                 |
| <b>Difference between row means</b>    |                      |         |                                     |                  |                 |
| <b>Mean of Sham</b>                    | 0,1319               |         |                                     |                  |                 |
| <b>Mean of mTBI</b>                    | 0,1590               |         |                                     |                  |                 |
| <b>Difference between means</b>        | -0,02703             |         |                                     |                  |                 |
| <b>SE of difference</b>                | 0,02662              |         |                                     |                  |                 |
| <b>95% CI of difference</b>            | -0.08841 to 0.03435  |         |                                     |                  |                 |
| <b>Interaction CI</b>                  |                      |         |                                     |                  |                 |
| <b>Mean diff, A1 - B1</b>              | 0,03480              |         |                                     |                  |                 |
| <b>Mean diff, A2 - B2</b>              | 0,1521               |         |                                     |                  |                 |
| <b>(A1 -B1) - (A2 - B2)</b>            | -0,1173              |         |                                     |                  |                 |
| <b>95% CI of difference</b>            | -0.2400 to 0.005492  |         |                                     |                  |                 |
| <b>(B1 - A1) - (B2 - A2)</b>           | 0,1173               |         |                                     |                  |                 |
| <b>95% CI of difference</b>            | -0.005492 to 0.2400  |         |                                     |                  |                 |
| <b>Normality of Residuals</b>          |                      |         |                                     |                  |                 |
| <b>Test name</b>                       | Statistics           | P value | Passed normality test (alpha=0.05)? |                  | P value summary |
| <b>D'Agostino-Pearson omnibus (K2)</b> | 0,3082               | 0,8572  | Yes                                 |                  | ns              |
| <b>Anderson-Darling (A2*)</b>          | 0,2616               | 0,6380  | Yes                                 |                  | ns              |
| <b>Shapiro-Wilk (W)</b>                | 0,9561               | 0,7265  | Yes                                 |                  | ns              |
| <b>Kolmogorov-Smirnov (distance)</b>   | 0,1464               | 0,1000  | Yes                                 |                  | ns              |
| <b>Data summary</b>                    |                      |         |                                     |                  |                 |

|                                     |    |  |  |  |  |
|-------------------------------------|----|--|--|--|--|
| <b>Number of columns (Genotype)</b> | 2  |  |  |  |  |
| <b>Number of rows (Injury)</b>      | 2  |  |  |  |  |
| <b>Number of values</b>             | 12 |  |  |  |  |

2way ANOVA of Ab1-40 cortex

| Table Analyzed                         | Ab1-40 cortex        |         |                                     |                          |          |
|----------------------------------------|----------------------|---------|-------------------------------------|--------------------------|----------|
| <b>Two-way ANOVA</b>                   | Ordinary             |         |                                     |                          |          |
| <b>Alpha</b>                           | 0,05                 |         |                                     |                          |          |
| <b>Source of Variation</b>             | % of total variation | P value | P value summary                     | Significant?             |          |
| <b>Interaction</b>                     | 24,85                | 0,0661  | ns                                  | No                       |          |
| <b>Injury</b>                          | 16,97                | 0,1168  | ns                                  | No                       |          |
| <b>Genotype</b>                        | 14,25                | 0,1458  | ns                                  | No                       |          |
| <b>ANOVA table</b>                     | SS                   | DF      | MS                                  | F (DFn, DFd)             | P value  |
| <b>Interaction</b>                     | 0,02162              | 1       |                                     | 0,02162 F (1, 8) = 4.526 | P=0.0661 |
| <b>Injury</b>                          | 0,01477              | 1       |                                     | 0,01477 F (1, 8) = 3.091 | P=0.1168 |
| <b>Genotype</b>                        | 0,01240              | 1       |                                     | 0,01240 F (1, 8) = 2.596 | P=0.1458 |
| <b>Residual</b>                        | 0,03822              | 8       |                                     | 0,004778                 |          |
| <b>Difference between column means</b> |                      |         |                                     |                          |          |
| <b>Mean of WT</b>                      | 0,1435               |         |                                     |                          |          |
| <b>Mean of APP-SWE</b>                 | 0,07917              |         |                                     |                          |          |
| <b>Difference between means</b>        | 0,06430              |         |                                     |                          |          |
| <b>SE of difference</b>                | 0,03991              |         |                                     |                          |          |
| <b>95% CI of difference</b>            | -0.02773 to 0.1563   |         |                                     |                          |          |
| <b>Difference between row means</b>    |                      |         |                                     |                          |          |
| <b>Mean of Sham</b>                    | 0,1464               |         |                                     |                          |          |
| <b>Mean of mTBI</b>                    | 0,07623              |         |                                     |                          |          |
| <b>Difference between means</b>        | 0,07017              |         |                                     |                          |          |
| <b>SE of difference</b>                | 0,03991              |         |                                     |                          |          |
| <b>95% CI of difference</b>            | -0.02186 to 0.1622   |         |                                     |                          |          |
| <b>Interaction CI</b>                  |                      |         |                                     |                          |          |
| <b>Mean diff, A1 - B1</b>              | 0,1492               |         |                                     |                          |          |
| <b>Mean diff, A2 - B2</b>              | -0,02060             |         |                                     |                          |          |
| <b>(A1 - B1) - (A2 - B2)</b>           | 0,1698               |         |                                     |                          |          |
| <b>95% CI of difference</b>            | -0.01426 to 0.3539   |         |                                     |                          |          |
| <b>(B1 - A1) - (B2 - A2)</b>           | -0,1698              |         |                                     |                          |          |
| <b>95% CI of difference</b>            | -0.3539 to 0.01426   |         |                                     |                          |          |
| <b>Normality of Residuals</b>          |                      |         |                                     |                          |          |
| <b>Test name</b>                       | Statistics           | P value | Passed normality test (alpha=0.05)? | P value summary          |          |
| <b>D'Agostino-Pearson omnibus (K2)</b> | 7,321                | 0,0257  | No                                  | *                        |          |
| <b>Anderson-Darling (A2*)</b>          | 0,9416               | 0,0113  | No                                  | *                        |          |
| <b>Shapiro-Wilk (W)</b>                | 0,8396               | 0,0274  | No                                  | *                        |          |
| <b>Kolmogorov-Smirnov (distance)</b>   | 0,2873               | 0,0071  | No                                  | **                       |          |
| <b>Data summary</b>                    |                      |         |                                     |                          |          |

|                                     |    |  |  |  |  |
|-------------------------------------|----|--|--|--|--|
| <b>Number of columns (Genotype)</b> | 2  |  |  |  |  |
| <b>Number of rows (Injury)</b>      | 2  |  |  |  |  |
| <b>Number of values</b>             | 12 |  |  |  |  |

2way ANOVA of Ab1-40 hipp

| Table Analyzed                         | Ab1-40 hipp          |         |                                     |                 |                   |
|----------------------------------------|----------------------|---------|-------------------------------------|-----------------|-------------------|
| <b>Two-way ANOVA</b>                   | Ordinary             |         |                                     |                 |                   |
| <b>Alpha</b>                           | 0,05                 |         |                                     |                 |                   |
| <b>Source of Variation</b>             | % of total variation | P value | P value summary                     | Significant?    |                   |
| <b>Interaction</b>                     | 2,414                | 0,6086  | ns                                  | No              |                   |
| <b>Injury</b>                          | 13,08                | 0,2499  | ns                                  | No              |                   |
| <b>Genotype</b>                        | 16,50                | 0,2011  | ns                                  | No              |                   |
| <b>ANOVA table</b>                     | SS                   | DF      | MS                                  | F (DFn, DFd)    | P value           |
| <b>Interaction</b>                     | 0,0005575            | 1       |                                     | 0,0005575       | F (1, 8) = 0.2840 |
| <b>Injury</b>                          | 0,003021             | 1       |                                     | 0,003021        | F (1, 8) = 1.539  |
| <b>Genotype</b>                        | 0,003809             | 1       |                                     | 0,003809        | F (1, 8) = 1.940  |
| <b>Residual</b>                        | 0,01571              | 8       |                                     | 0,001963        |                   |
| <b>Difference between column means</b> |                      |         |                                     |                 |                   |
| <b>Mean of WT</b>                      | 0,06405              |         |                                     |                 |                   |
| <b>Mean of APP-SWE</b>                 | 0,02842              |         |                                     |                 |                   |
| <b>Difference between means</b>        | 0,03563              |         |                                     |                 |                   |
| <b>SE of difference</b>                | 0,02558              |         |                                     |                 |                   |
| <b>95% CI of difference</b>            | -0.02336 to 0.09462  |         |                                     |                 |                   |
| <b>Difference between row means</b>    |                      |         |                                     |                 |                   |
| <b>Mean of Sham</b>                    | 0,06210              |         |                                     |                 |                   |
| <b>Mean of mTBI</b>                    | 0,03037              |         |                                     |                 |                   |
| <b>Difference between means</b>        | 0,03173              |         |                                     |                 |                   |
| <b>SE of difference</b>                | 0,02558              |         |                                     |                 |                   |
| <b>95% CI of difference</b>            | -0.02726 to 0.09072  |         |                                     |                 |                   |
| <b>Interaction CI</b>                  |                      |         |                                     |                 |                   |
| <b>Mean diff, A1 - B1</b>              | 0,04927              |         |                                     |                 |                   |
| <b>Mean diff, A2 - B2</b>              | 0,02200              |         |                                     |                 |                   |
| <b>(A1 -B1) - (A2 - B2)</b>            | 0,02726              |         |                                     |                 |                   |
| <b>95% CI of difference</b>            | -0.09072 to 0.1452   |         |                                     |                 |                   |
| <b>(B1 - A1) - (B2 - A2)</b>           | -0,02726             |         |                                     |                 |                   |
| <b>95% CI of difference</b>            | -0.1452 to 0.09072   |         |                                     |                 |                   |
| <b>Normality of Residuals</b>          |                      |         |                                     |                 |                   |
| <b>Test name</b>                       | Statistics           | P value | Passed normality test (alpha=0.05)? | P value summary |                   |
| <b>D'Agostino-Pearson omnibus (K2)</b> | 5,442                | 0,0658  | Yes                                 | ns              |                   |
| <b>Anderson-Darling (A2*)</b>          | 0,3788               | 0,3464  | Yes                                 | ns              |                   |
| <b>Shapiro-Wilk (W)</b>                | 0,9146               | 0,2446  | Yes                                 | ns              |                   |
| <b>Kolmogorov-Smirnov (distance)</b>   | 0,1564               | 0,1000  | Yes                                 | ns              |                   |
| <b>Data summary</b>                    |                      |         |                                     |                 |                   |

|                                     |    |  |  |  |  |
|-------------------------------------|----|--|--|--|--|
| <b>Number of columns (Genotype)</b> | 2  |  |  |  |  |
| <b>Number of rows (Injury)</b>      | 2  |  |  |  |  |
| <b>Number of values</b>             | 12 |  |  |  |  |

2way ANOVA of BACE1 cortex

| Table Analyzed                         | BACE1 cortex         |         |                                     |                   |          |
|----------------------------------------|----------------------|---------|-------------------------------------|-------------------|----------|
| <b>Two-way ANOVA</b>                   | Ordinary             |         |                                     |                   |          |
| Alpha                                  | 0,05                 |         |                                     |                   |          |
| <b>Source of Variation</b>             | % of total variation | P value | P value summary                     | Significant?      |          |
| Interaction                            | 16,15                | 0,0462  | *                                   | Yes               |          |
| Injury                                 | 10,44                | 0,1005  | ns                                  | No                |          |
| Genotype                               | 13,06                | 0,0694  | ns                                  | No                |          |
| <b>ANOVA table</b>                     | SS (Type III)        | DF      | MS                                  | F (DFn, DFd)      | P value  |
| Interaction                            | 1,513                | 1       | 1,513                               | F (1, 14) = 4.783 | P=0.0462 |
| Injury                                 | 0,9778               | 1       | 0,9778                              | F (1, 14) = 3.092 | P=0.1005 |
| Genotype                               | 1,222                | 1       | 1,222                               | F (1, 14) = 3.866 | P=0.0694 |
| Residual                               | 4,427                | 14      | 0,3162                              |                   |          |
| <b>Difference between column means</b> |                      |         |                                     |                   |          |
| Predicted (LS) mean of WT              | 0,9398               |         |                                     |                   |          |
| Predicted (LS) mean of APP-SWE         | 1,493                |         |                                     |                   |          |
| Difference between predicted means     | -0,5528              |         |                                     |                   |          |
| SE of difference                       | 0,2812               |         |                                     |                   |          |
| 95% CI of difference                   | -1.156 to 0.05022    |         |                                     |                   |          |
| <b>Difference between row means</b>    |                      |         |                                     |                   |          |
| Predicted (LS) mean of Sham            | 0,9689               |         |                                     |                   |          |
| Predicted (LS) mean of mTBI            | 1,463                |         |                                     |                   |          |
| Difference between predicted means     | -0,4944              |         |                                     |                   |          |
| SE of difference                       | 0,2812               |         |                                     |                   |          |
| 95% CI of difference                   | -1.097 to 0.1086     |         |                                     |                   |          |
| <b>Interaction CI</b>                  |                      |         |                                     |                   |          |
| Mean diff, A1 - B1                     | 0,06211              |         |                                     |                   |          |
| Mean diff, A2 - B2                     | -1,168               |         |                                     |                   |          |
| (A1 - B1) - (A2 - B2)                  | 1,230                |         |                                     |                   |          |
| 95% CI of difference                   | 0.02378 to 2.436     |         |                                     |                   |          |
| (B1 - A1) - (B2 - A2)                  | -1,230               |         |                                     |                   |          |
| 95% CI of difference                   | -2.436 to -0.02378   |         |                                     |                   |          |
| <b>Normality of Residuals</b>          |                      |         |                                     |                   |          |
| Test name                              | Statistics           | P value | Passed normality test (alpha=0.05)? | P value summary   |          |
| D'Agostino-Pearson omnibus (K2)        | 3,940                | 0,1394  | Yes                                 | ns                |          |
| Anderson-Darling (A2*)                 | 1,272                | 0,0019  | No                                  | **                |          |
| Shapiro-Wilk (W)                       | 0,8560               | 0,0106  | No                                  | *                 |          |
| Kolmogorov-Smirnov (distance)          | 0,2341               | 0,0102  | No                                  | *                 |          |
| <b>Data summary</b>                    |                      |         |                                     |                   |          |
| Number of columns (Genotype)           | 2                    |         |                                     |                   |          |
| Number of rows (Injury)                | 2                    |         |                                     |                   |          |

|                         |    |  |  |  |
|-------------------------|----|--|--|--|
| <b>Number of values</b> | 18 |  |  |  |
|-------------------------|----|--|--|--|

2way ANOVA of BACE1 hipp

| Table Analyzed                         | BACE1 hipp           |         |                                     |                    |          |
|----------------------------------------|----------------------|---------|-------------------------------------|--------------------|----------|
| <b>Two-way ANOVA</b>                   | Ordinary             |         |                                     |                    |          |
| Alpha                                  | 0,05                 |         |                                     |                    |          |
| <b>Source of Variation</b>             | % of total variation | P value | P value summary                     | Significant?       |          |
| Interaction                            | 2,128                | 0,4547  | ns                                  | No                 |          |
| Injury                                 | 9,010                | 0,1310  | ns                                  | No                 |          |
| Genotype                               | 2,749                | 0,3963  | ns                                  | No                 |          |
| <b>ANOVA table</b>                     | SS (Type III)        | DF      | MS                                  | F (DFn, DFd)       | P value  |
| Interaction                            | 0,08917              | 1       | 0,08917                             | F (1, 24) = 0.5775 | P=0.4547 |
| Injury                                 | 0,3775               | 1       | 0,3775                              | F (1, 24) = 2.445  | P=0.1310 |
| Genotype                               | 0,1152               | 1       | 0,1152                              | F (1, 24) = 0.7459 | P=0.3963 |
| Residual                               | 3,706                | 24      | 0,1544                              |                    |          |
| <b>Difference between column means</b> |                      |         |                                     |                    |          |
| Predicted (LS) mean of WT              | 0,8088               |         |                                     |                    |          |
| Predicted (LS) mean of APP-SWE         | 0,6666               |         |                                     |                    |          |
| Difference between predicted means     | 0,1422               |         |                                     |                    |          |
| SE of difference                       | 0,1646               |         |                                     |                    |          |
| 95% CI of difference                   | -0.1976 to 0.4819    |         |                                     |                    |          |
| <b>Difference between row means</b>    |                      |         |                                     |                    |          |
| Predicted (LS) mean of Sham            | 0,8664               |         |                                     |                    |          |
| Predicted (LS) mean of mTBI            | 0,6090               |         |                                     |                    |          |
| Difference between predicted means     | 0,2574               |         |                                     |                    |          |
| SE of difference                       | 0,1646               |         |                                     |                    |          |
| 95% CI of difference                   | -0.08235 to 0.5971   |         |                                     |                    |          |
| <b>Interaction CI</b>                  |                      |         |                                     |                    |          |
| Mean diff, A1 - B1                     | 0,2673               |         |                                     |                    |          |
| Mean diff, A2 - B2                     | 0,01707              |         |                                     |                    |          |
| (A1 - B1) - (A2 - B2)                  | 0,2502               |         |                                     |                    |          |
| 95% CI of difference                   | -0.4293 to 0.9297    |         |                                     |                    |          |
| (B1 - A1) - (B2 - A2)                  | -0,2502              |         |                                     |                    |          |
| 95% CI of difference                   | -0.9297 to 0.4293    |         |                                     |                    |          |
| <b>Normality of Residuals</b>          |                      |         |                                     |                    |          |
| Test name                              | Statistics           | P value | Passed normality test (alpha=0.05)? | P value summary    |          |
| D'Agostino-Pearson omnibus (K2)        | 3,096                | 0,2126  | Yes                                 | ns                 |          |
| Anderson-Darling (A2*)                 | 0,5180               | 0,1726  | Yes                                 | ns                 |          |
| Shapiro-Wilk (W)                       | 0,9512               | 0,2120  | Yes                                 | ns                 |          |
| Kolmogorov-Smirnov (distance)          | 0,1411               | 0,1000  | Yes                                 | ns                 |          |
| <b>Data summary</b>                    |                      |         |                                     |                    |          |
| Number of columns (Genotype)           | 2                    |         |                                     |                    |          |
| Number of rows (Injury)                | 2                    |         |                                     |                    |          |

|                         |    |  |  |  |
|-------------------------|----|--|--|--|
| <b>Number of values</b> | 28 |  |  |  |
|-------------------------|----|--|--|--|

2way ANOVA of BACE2 cortex

| Table Analyzed                         | BACE2 cortex         |         |                                     |                 |                             |
|----------------------------------------|----------------------|---------|-------------------------------------|-----------------|-----------------------------|
| <b>Two-way ANOVA</b>                   | Ordinary             |         |                                     |                 |                             |
| Alpha                                  | 0,05                 |         |                                     |                 |                             |
| <b>Source of Variation</b>             | % of total variation | P value | P value summary                     | Significant?    |                             |
| Interaction                            | 2,699                | 0,4603  | ns                                  | No              |                             |
| Injury                                 | 11,88                | 0,1319  | ns                                  | No              |                             |
| Genotype                               | 1,808                | 0,5445  | ns                                  | No              |                             |
| <b>ANOVA table</b>                     | SS (Type III)        | DF      | MS                                  | F (DFn, DFd)    | P value                     |
| Interaction                            | 0,2239               | 1       |                                     | 0,2239          | F (1, 16) = 0.5725 P=0.4603 |
| Injury                                 | 0,9856               | 1       |                                     | 0,9856          | F (1, 16) = 2.521 P=0.1319  |
| Genotype                               | 0,1500               | 1       |                                     | 0,1500          | F (1, 16) = 0.3835 P=0.5445 |
| Residual                               | 6,257                | 16      |                                     | 0,3910          |                             |
| <b>Difference between column means</b> |                      |         |                                     |                 |                             |
| Predicted (LS) mean of WT              | 1,127                |         |                                     |                 |                             |
| Predicted (LS) mean of APP-SWE         | 1,316                |         |                                     |                 |                             |
| Difference between predicted means     | -0,1890              |         |                                     |                 |                             |
| SE of difference                       | 0,3051               |         |                                     |                 |                             |
| 95% CI of difference                   | -0.8358 to 0.4579    |         |                                     |                 |                             |
| <b>Difference between row means</b>    |                      |         |                                     |                 |                             |
| Predicted (LS) mean of Sham            | 0,9790               |         |                                     |                 |                             |
| Predicted (LS) mean of mTBI            | 1,463                |         |                                     |                 |                             |
| Difference between predicted means     | -0,4844              |         |                                     |                 |                             |
| SE of difference                       | 0,3051               |         |                                     |                 |                             |
| 95% CI of difference                   | -1.131 to 0.1624     |         |                                     |                 |                             |
| <b>Interaction CI</b>                  |                      |         |                                     |                 |                             |
| Mean diff, A1 - B1                     | 0,04193              |         |                                     |                 |                             |
| Mean diff, A2 - B2                     | -0,4198              |         |                                     |                 |                             |
| (A1 - B1) - (A2 - B2)                  | 0,4618               |         |                                     |                 |                             |
| 95% CI of difference                   | -0.8319 to 1.755     |         |                                     |                 |                             |
| (B1 - A1) - (B2 - A2)                  | -0,4618              |         |                                     |                 |                             |
| 95% CI of difference                   | -1.755 to 0.8319     |         |                                     |                 |                             |
| <b>Normality of Residuals</b>          |                      |         |                                     |                 |                             |
| Test name                              | Statistics           | P value | Passed normality test (alpha=0.05)? | P value summary |                             |
| D'Agostino-Pearson omnibus (K2)        | 0,7414               | 0,6903  | Yes                                 | ns              |                             |
| Anderson-Darling (A2*)                 | 1,333                | 0,0014  | No                                  | **              |                             |
| Shapiro-Wilk (W)                       | 0,8651               | 0,0096  | No                                  | **              |                             |
| Kolmogorov-Smirnov (distance)          | 0,2243               | 0,0096  | No                                  | **              |                             |
| <b>Data summary</b>                    |                      |         |                                     |                 |                             |
| Number of columns (Genotype)           | 2                    |         |                                     |                 |                             |
| Number of rows (Injury)                | 2                    |         |                                     |                 |                             |

|                         |    |  |  |  |
|-------------------------|----|--|--|--|
| <b>Number of values</b> | 20 |  |  |  |
|-------------------------|----|--|--|--|

2way ANOVA of BACE2 hipp

| Table Analyzed                         | BACE2 hipp           |         |                                     |                     |                 |
|----------------------------------------|----------------------|---------|-------------------------------------|---------------------|-----------------|
| <b>Two-way ANOVA</b>                   | Ordinary             |         |                                     |                     |                 |
| Alpha                                  | 0,05                 |         |                                     |                     |                 |
| <b>Source of Variation</b>             | % of total variation | P value | P value summary                     |                     | Significant?    |
| Interaction                            | 0,2423               | 0,7556  | ns                                  |                     | No              |
| Injury                                 | 7,805                | 0,0859  | ns                                  |                     | No              |
| Genotype                               | 27,70                | 0,0024  | **                                  |                     | Yes             |
| <b>ANOVA table</b>                     | SS (Type III)        | DF      | MS                                  | F (DFn, DFd)        | P value         |
| Interaction                            | 0,01819              | 1       | 0,01819                             | F (1, 26) = 0.09898 | P=0.7556        |
| Injury                                 | 0,5859               | 1       | 0,5859                              | F (1, 26) = 3.188   | P=0.0859        |
| Genotype                               | 2,079                | 1       | 2,079                               | F (1, 26) = 11.31   | P=0.0024        |
| Residual                               | 4,778                | 26      | 0,1838                              |                     |                 |
| <b>Difference between column means</b> |                      |         |                                     |                     |                 |
| Predicted (LS) mean of WT              | 0,8142               |         |                                     |                     |                 |
| Predicted (LS) mean of APP-SWE         | 1,409                |         |                                     |                     |                 |
| Difference between predicted means     | -0,5953              |         |                                     |                     |                 |
| SE of difference                       | 0,1770               |         |                                     |                     |                 |
| 95% CI of difference                   | -0.9591 to -0.2315   |         |                                     |                     |                 |
| <b>Difference between row means</b>    |                      |         |                                     |                     |                 |
| Predicted (LS) mean of Sham            | 1,270                |         |                                     |                     |                 |
| Predicted (LS) mean of mTBI            | 0,9538               |         |                                     |                     |                 |
| Difference between predicted means     | 0,3160               |         |                                     |                     |                 |
| SE of difference                       | 0,1770               |         |                                     |                     |                 |
| 95% CI of difference                   | -0.04780 to 0.6798   |         |                                     |                     |                 |
| <b>Interaction CI</b>                  |                      |         |                                     |                     |                 |
| Mean diff, A1 - B1                     | -0,5397              |         |                                     |                     |                 |
| Mean diff, A2 - B2                     | -0,6510              |         |                                     |                     |                 |
| (A1 - B1) - (A2 - B2)                  | 0,1114               |         |                                     |                     |                 |
| 95% CI of difference                   | -0.6162 to 0.8390    |         |                                     |                     |                 |
| (B1 - A1) - (B2 - A2)                  | -0,1114              |         |                                     |                     |                 |
| 95% CI of difference                   | -0.8390 to 0.6162    |         |                                     |                     |                 |
| <b>Normality of Residuals</b>          |                      |         |                                     |                     |                 |
| Test name                              | Statistics           | P value | Passed normality test (alpha=0.05)? |                     | P value summary |
| D'Agostino-Pearson omnibus (K2)        | 7,696                | 0,0213  | No                                  |                     | *               |
| Anderson-Darling (A2*)                 | 0,7163               | 0,0551  | Yes                                 |                     | ns              |
| Shapiro-Wilk (W)                       | 0,9356               | 0,0691  | Yes                                 |                     | ns              |
| Kolmogorov-Smirnov (distance)          | 0,1419               | 0,1000  | Yes                                 |                     | ns              |
| <b>Data summary</b>                    |                      |         |                                     |                     |                 |
| Number of columns (Genotype)           | 2                    |         |                                     |                     |                 |
| Number of rows (Injury)                | 2                    |         |                                     |                     |                 |
| Number of values                       | 30                   |         |                                     |                     |                 |

2way ANOVA of IFN-g plasma

| Table Analyzed                         | IFN-g plasma          |         |                                     |              |                             |
|----------------------------------------|-----------------------|---------|-------------------------------------|--------------|-----------------------------|
| <b>Two-way ANOVA</b>                   | Ordinary              |         |                                     |              |                             |
| Alpha                                  | 0,05                  |         |                                     |              |                             |
| <b>Source of Variation</b>             | % of total variation  | P value | P value summary                     |              | Significant?                |
| Interaction                            | 0,6451                | 0,4686  | ns                                  |              | No                          |
| Injury                                 | 10,40                 | 0,0118  | *                                   |              | Yes                         |
| Genotype                               | 74,26                 | <0.0001 | ****                                |              | Yes                         |
| <b>ANOVA table</b>                     | SS (Type III)         | DF      | MS                                  | F (DFn, DFd) | P value                     |
| Interaction                            | 1,842E-05             | 1       |                                     | 1,842E-05    | F (1, 11) = 0.5635 P=0.4686 |
| Injury                                 | 0,0002968             | 1       |                                     | 0,0002968    | F (1, 11) = 9.081 P=0.0118  |
| Genotype                               | 0,002120              | 1       |                                     | 0,002120     | F (1, 11) = 64.86 P<0.0001  |
| Residual                               | 0,0003595             | 11      |                                     | 3,268E-05    |                             |
| <b>Difference between column means</b> |                       |         |                                     |              |                             |
| Predicted (LS) mean of WT              | 0,02422               |         |                                     |              |                             |
| Predicted (LS) mean of APP-SWE         | 0,04854               |         |                                     |              |                             |
| Difference between predicted means     | -0,02433              |         |                                     |              |                             |
| SE of difference                       | 0,003021              |         |                                     |              |                             |
| 95% CI of difference                   | -0.03098 to -0.01768  |         |                                     |              |                             |
| <b>Difference between row means</b>    |                       |         |                                     |              |                             |
| Predicted (LS) mean of Sham            | 0,03183               |         |                                     |              |                             |
| Predicted (LS) mean of mTBI            | 0,04093               |         |                                     |              |                             |
| Difference between predicted means     | -0,009103             |         |                                     |              |                             |
| SE of difference                       | 0,003021              |         |                                     |              |                             |
| 95% CI of difference                   | -0.01575 to -0.002454 |         |                                     |              |                             |
| <b>Interaction CI</b>                  |                       |         |                                     |              |                             |
| Mean diff, A1 - B1                     | -0,02660              |         |                                     |              |                             |
| Mean diff, A2 - B2                     | -0,02206              |         |                                     |              |                             |
| (A1 - B1) - (A2 - B2)                  | -0,004535             |         |                                     |              |                             |
| 95% CI of difference                   | -0.01783 to 0.008762  |         |                                     |              |                             |
| (B1 - A1) - (B2 - A2)                  | 0,004535              |         |                                     |              |                             |
| 95% CI of difference                   | -0.008762 to 0.01783  |         |                                     |              |                             |
| <b>Normality of Residuals</b>          |                       |         |                                     |              |                             |
| Test name                              | Statistics            | P value | Passed normality test (alpha=0.05)? |              | P value summary             |
| D'Agostino-Pearson omnibus (K2)        | 0,1052                | 0,9488  | Yes                                 |              | ns                          |
| Anderson-Darling (A2*)                 | 0,1947                | 0,8697  | Yes                                 |              | ns                          |
| Shapiro-Wilk (W)                       | 0,9694                | 0,8491  | Yes                                 |              | ns                          |
| Kolmogorov-Smirnov (distance)          | 0,1098                | 0,1000  | Yes                                 |              | ns                          |
| <b>Data summary</b>                    |                       |         |                                     |              |                             |
| Number of columns (Genotype)           | 2                     |         |                                     |              |                             |
| Number of rows (Injury)                | 2                     |         |                                     |              |                             |
| Number of values                       | 15                    |         |                                     |              |                             |

2way ANOVA of IL-17A plasma

| Table Analyzed                         | IL-17A plasma        |         |                                     |                  |          |
|----------------------------------------|----------------------|---------|-------------------------------------|------------------|----------|
| <b>Two-way ANOVA</b>                   | Ordinary             |         |                                     |                  |          |
| Alpha                                  | 0,05                 |         |                                     |                  |          |
| <b>Source of Variation</b>             | % of total variation | P value | P value summary                     | Significant?     |          |
| Interaction                            | 17,26                | 0,0050  | **                                  | Yes              |          |
| Injury                                 | 50,06                | 0,0001  | ***                                 | Yes              |          |
| Genotype                               | 24,08                | 0,0018  | **                                  | Yes              |          |
| <b>ANOVA table</b>                     | SS (Type III)        | DF      | MS                                  | F (DFn, DFd)     | P value  |
| Interaction                            | 0,09225              | 1       | 0,09225                             | F (1, 9) = 13.59 | P=0.0050 |
| Injury                                 | 0,2675               | 1       | 0,2675                              | F (1, 9) = 39.42 | P=0.0001 |
| Genotype                               | 0,1287               | 1       | 0,1287                              | F (1, 9) = 18.96 | P=0.0018 |
| Residual                               | 0,06107              | 9       | 0,006786                            |                  |          |
| <b>Difference between column means</b> |                      |         |                                     |                  |          |
| Predicted (LS) mean of WT              | 0,7767               |         |                                     |                  |          |
| Predicted (LS) mean of APP-SWE         | 0,9772               |         |                                     |                  |          |
| Difference between predicted means     | -0,2005              |         |                                     |                  |          |
| SE of difference                       | 0,04605              |         |                                     |                  |          |
| 95% CI of difference                   | -0.3047 to -0.09637  |         |                                     |                  |          |
| <b>Difference between row means</b>    |                      |         |                                     |                  |          |
| Predicted (LS) mean of Sham            | 0,7324               |         |                                     |                  |          |
| Predicted (LS) mean of mTBI            | 1,022                |         |                                     |                  |          |
| Difference between predicted means     | -0,2891              |         |                                     |                  |          |
| SE of difference                       | 0,04605              |         |                                     |                  |          |
| 95% CI of difference                   | -0.3933 to -0.1850   |         |                                     |                  |          |
| <b>Interaction CI</b>                  |                      |         |                                     |                  |          |
| Mean diff, A1 - B1                     | -0,03075             |         |                                     |                  |          |
| Mean diff, A2 - B2                     | -0,3703              |         |                                     |                  |          |
| (A1 - B1) - (A2 - B2)                  | 0,3396               |         |                                     |                  |          |
| 95% CI of difference                   | 0.1312 to 0.5479     |         |                                     |                  |          |
| (B1 - A1) - (B2 - A2)                  | -0,3396              |         |                                     |                  |          |
| 95% CI of difference                   | -0.5479 to -0.1312   |         |                                     |                  |          |
| <b>Normality of Residuals</b>          |                      |         |                                     |                  |          |
| Test name                              | Statistics           | P value | Passed normality test (alpha=0.05)? | P value summary  |          |
| D'Agostino-Pearson omnibus (K2)        | 0,7892               | 0,6740  | Yes                                 | ns               |          |
| Anderson-Darling (A2*)                 | 0,2879               | 0,5598  | Yes                                 | ns               |          |
| Shapiro-Wilk (W)                       | 0,9582               | 0,7253  | Yes                                 | ns               |          |
| Kolmogorov-Smirnov (distance)          | 0,1595               | 0,1000  | Yes                                 | ns               |          |
| <b>Data summary</b>                    |                      |         |                                     |                  |          |
| Number of columns (Genotype)           | 2                    |         |                                     |                  |          |
| Number of rows (Injury)                | 2                    |         |                                     |                  |          |

|                  |    |  |  |  |
|------------------|----|--|--|--|
| Number of values | 13 |  |  |  |
|------------------|----|--|--|--|

2way ANOVA of IL-1beta plasma

| Table Analyzed                            | IL-1beta plasma      |         |                                     |                    |          |
|-------------------------------------------|----------------------|---------|-------------------------------------|--------------------|----------|
| <b>Two-way ANOVA</b>                      | Ordinary             |         |                                     |                    |          |
| <b>Alpha</b>                              | 0,05                 |         |                                     |                    |          |
| <b>Source of Variation</b>                | % of total variation | P value | P value summary                     | Significant?       |          |
| <b>Interaction</b>                        | 0,7104               | 0,3525  | ns                                  | No                 |          |
| <b>Injury</b>                             | 46,99                | <0.0001 | ****                                | Yes                |          |
| <b>Genotype</b>                           | 48,81                | <0.0001 | ****                                | Yes                |          |
| <b>ANOVA table</b>                        | SS (Type III)        | DF      | MS                                  | F (DFn, DFd)       | P value  |
| <b>Interaction</b>                        | 0,0003415            | 1       | 0,0003415                           | F (1, 11) = 0.9424 | P=0.3525 |
| <b>Injury</b>                             | 0,02258              | 1       | 0,02258                             | F (1, 11) = 62.33  | P<0.0001 |
| <b>Genotype</b>                           | 0,02346              | 1       | 0,02346                             | F (1, 11) = 64.75  | P<0.0001 |
| <b>Residual</b>                           | 0,003986             | 11      | 0,0003623                           |                    |          |
| <b>Difference between column means</b>    |                      |         |                                     |                    |          |
| <b>Predicted (LS) mean of WT</b>          | 0,06075              |         |                                     |                    |          |
| <b>Predicted (LS) mean of APP-SWE</b>     | 0,1417               |         |                                     |                    |          |
| <b>Difference between predicted means</b> | -0,08093             |         |                                     |                    |          |
| <b>SE of difference</b>                   | 0,01006              |         |                                     |                    |          |
| <b>95% CI of difference</b>               | -0.1031 to -0.05879  |         |                                     |                    |          |
| <b>Difference between row means</b>       |                      |         |                                     |                    |          |
| <b>Predicted (LS) mean of Sham</b>        | 0,06151              |         |                                     |                    |          |
| <b>Predicted (LS) mean of mTBI</b>        | 0,1409               |         |                                     |                    |          |
| <b>Difference between predicted means</b> | -0,07940             |         |                                     |                    |          |
| <b>SE of difference</b>                   | 0,01006              |         |                                     |                    |          |
| <b>95% CI of difference</b>               | -0.1015 to -0.05727  |         |                                     |                    |          |
| <b>Interaction CI</b>                     |                      |         |                                     |                    |          |
| <b>Mean diff, A1 - B1</b>                 | -0,09069             |         |                                     |                    |          |
| <b>Mean diff, A2 - B2</b>                 | -0,07117             |         |                                     |                    |          |
| <b>(A1 - B1) - (A2 - B2)</b>              | -0,01953             |         |                                     |                    |          |
| <b>95% CI of difference</b>               | -0.06380 to 0.02475  |         |                                     |                    |          |
| <b>(B1 - A1) - (B2 - A2)</b>              | 0,01953              |         |                                     |                    |          |
| <b>95% CI of difference</b>               | -0.02475 to 0.06380  |         |                                     |                    |          |
| <b>Normality of Residuals</b>             |                      |         |                                     |                    |          |
| <b>Test name</b>                          | Statistics           | P value | Passed normality test (alpha=0.05)? | P value summary    |          |
| <b>D'Agostino-Pearson omnibus (K2)</b>    | 1,374                | 0,5030  | Yes                                 | ns                 |          |
| <b>Anderson-Darling (A2*)</b>             | 0,2769               | 0,6015  | Yes                                 | ns                 |          |
| <b>Shapiro-Wilk (W)</b>                   | 0,9733               | 0,9039  | Yes                                 | ns                 |          |
| <b>Kolmogorov-Smirnov (distance)</b>      | 0,1324               | 0,1000  | Yes                                 | ns                 |          |
| <b>Data summary</b>                       |                      |         |                                     |                    |          |
| <b>Number of columns (Genotype)</b>       | 2                    |         |                                     |                    |          |
| <b>Number of rows (Injury)</b>            | 2                    |         |                                     |                    |          |
| <b>Number of values</b>                   | 15                   |         |                                     |                    |          |

2way ANOVA of TNF-a plasma

| Table Analyzed                         | TNF-a plasma         |         |                                     |                   |          |
|----------------------------------------|----------------------|---------|-------------------------------------|-------------------|----------|
| <b>Two-way ANOVA</b>                   | Ordinary             |         |                                     |                   |          |
| Alpha                                  | 0,05                 |         |                                     |                   |          |
| <b>Source of Variation</b>             | % of total variation | P value | P value summary                     | Significant?      |          |
| Interaction                            | 8,830                | 0,1336  | ns                                  | No                |          |
| Injury                                 | 50,42                | 0,0023  | **                                  | Yes               |          |
| Genotype                               | 6,555                | 0,1909  | ns                                  | No                |          |
| <b>ANOVA table</b>                     | SS (Type III)        | DF      | MS                                  | F (DFn, DFd)      | P value  |
| Interaction                            | 0,008536             | 1       | 0,008536                            | F (1, 12) = 2.589 | P=0.1336 |
| Injury                                 | 0,04874              | 1       | 0,04874                             | F (1, 12) = 14.78 | P=0.0023 |
| Genotype                               | 0,006336             | 1       | 0,006336                            | F (1, 12) = 1.922 | P=0.1909 |
| Residual                               | 0,03956              | 12      | 0,003297                            |                   |          |
| <b>Difference between column means</b> |                      |         |                                     |                   |          |
| Predicted (LS) mean of WT              | 0,5189               |         |                                     |                   |          |
| Predicted (LS) mean of APP-SWE         | 0,5594               |         |                                     |                   |          |
| Difference between predicted means     | -0,04046             |         |                                     |                   |          |
| SE of difference                       | 0,02918              |         |                                     |                   |          |
| 95% CI of difference                   | -0.1040 to 0.02313   |         |                                     |                   |          |
| <b>Difference between row means</b>    |                      |         |                                     |                   |          |
| Predicted (LS) mean of Sham            | 0,4830               |         |                                     |                   |          |
| Predicted (LS) mean of mTBI            | 0,5953               |         |                                     |                   |          |
| Difference between predicted means     | -0,1122              |         |                                     |                   |          |
| SE of difference                       | 0,02918              |         |                                     |                   |          |
| 95% CI of difference                   | -0.1758 to -0.04862  |         |                                     |                   |          |
| <b>Interaction CI</b>                  |                      |         |                                     |                   |          |
| Mean diff, A1 - B1                     | -0,08742             |         |                                     |                   |          |
| Mean diff, A2 - B2                     | 0,006500             |         |                                     |                   |          |
| (A1 - B1) - (A2 - B2)                  | -0,09392             |         |                                     |                   |          |
| 95% CI of difference                   | -0.2211 to 0.03326   |         |                                     |                   |          |
| (B1 - A1) - (B2 - A2)                  | 0,09392              |         |                                     |                   |          |
| 95% CI of difference                   | -0.03326 to 0.2211   |         |                                     |                   |          |
| <b>Normality of Residuals</b>          |                      |         |                                     |                   |          |
| Test name                              | Statistics           | P value | Passed normality test (alpha=0.05)? | P value summary   |          |
| D'Agostino-Pearson omnibus (K2)        | 4,182                | 0,1236  | Yes                                 | ns                |          |
| Anderson-Darling (A2*)                 | 0,6144               | 0,0906  | Yes                                 | ns                |          |
| Shapiro-Wilk (W)                       | 0,9284               | 0,2298  | Yes                                 | ns                |          |
| Kolmogorov-Smirnov (distance)          | 0,2001               | 0,0864  | Yes                                 | ns                |          |
| <b>Data summary</b>                    |                      |         |                                     |                   |          |
| Number of columns (Genotype)           | 2                    |         |                                     |                   |          |
| Number of rows (Injury)                | 2                    |         |                                     |                   |          |

|                         |    |  |  |  |
|-------------------------|----|--|--|--|
| <b>Number of values</b> | 16 |  |  |  |
|-------------------------|----|--|--|--|

2way ANOVA of IL22 plasma

| Table Analyzed                         | IL22 plasma          |         |                                     |                    |          |
|----------------------------------------|----------------------|---------|-------------------------------------|--------------------|----------|
| <b>Two-way ANOVA</b>                   | Ordinary             |         |                                     |                    |          |
| Alpha                                  | 0,05                 |         |                                     |                    |          |
| <b>Source of Variation</b>             | % of total variation | P value | P value summary                     | Significant?       |          |
| Interaction                            | 26,37                | 0,0717  | ns                                  | No                 |          |
| Injury                                 | 0,8996               | 0,7199  | ns                                  | No                 |          |
| Genotype                               | 0,9514               | 0,7123  | ns                                  | No                 |          |
| <b>ANOVA table</b>                     | SS (Type III)        | DF      | MS                                  | F (DFn, DFd)       | P value  |
| Interaction                            | 0,05500              | 1       | 0,05500                             | F (1, 11) = 3.970  | P=0.0717 |
| Injury                                 | 0,001876             | 1       | 0,001876                            | F (1, 11) = 0.1354 | P=0.7199 |
| Genotype                               | 0,001984             | 1       | 0,001984                            | F (1, 11) = 0.1432 | P=0.7123 |
| Residual                               | 0,1524               | 11      | 0,01385                             |                    |          |
| <b>Difference between column means</b> |                      |         |                                     |                    |          |
| Predicted (LS) mean of WT              | 0,1776               |         |                                     |                    |          |
| Predicted (LS) mean of APP-SWE         | 0,2011               |         |                                     |                    |          |
| Difference between predicted means     | -0,02354             |         |                                     |                    |          |
| SE of difference                       | 0,06219              |         |                                     |                    |          |
| 95% CI of difference                   | -0.1604 to 0.1133    |         |                                     |                    |          |
| <b>Difference between row means</b>    |                      |         |                                     |                    |          |
| Predicted (LS) mean of Sham            | 0,1779               |         |                                     |                    |          |
| Predicted (LS) mean of mTBI            | 0,2008               |         |                                     |                    |          |
| Difference between predicted means     | -0,02289             |         |                                     |                    |          |
| SE of difference                       | 0,06219              |         |                                     |                    |          |
| 95% CI of difference                   | -0.1598 to 0.1140    |         |                                     |                    |          |
| <b>Interaction CI</b>                  |                      |         |                                     |                    |          |
| Mean diff, A1 - B1                     | -0,1475              |         |                                     |                    |          |
| Mean diff, A2 - B2                     | 0,1004               |         |                                     |                    |          |
| (A1 - B1) - (A2 - B2)                  | -0,2478              |         |                                     |                    |          |
| 95% CI of difference                   | -0.5216 to 0.02592   |         |                                     |                    |          |
| (B1 - A1) - (B2 - A2)                  | 0,2478               |         |                                     |                    |          |
| 95% CI of difference                   | -0.02592 to 0.5216   |         |                                     |                    |          |
| <b>Normality of Residuals</b>          |                      |         |                                     |                    |          |
| Test name                              | Statistics           | P value | Passed normality test (alpha=0.05)? | P value summary    |          |
| D'Agostino-Pearson omnibus (K2)        | 1,408                | 0,4945  | Yes                                 | ns                 |          |
| Anderson-Darling (A2*)                 | 0,2220               | 0,7911  | Yes                                 | ns                 |          |
| Shapiro-Wilk (W)                       | 0,9642               | 0,7643  | Yes                                 | ns                 |          |
| Kolmogorov-Smirnov (distance)          | 0,1292               | 0,1000  | Yes                                 | ns                 |          |
| <b>Data summary</b>                    |                      |         |                                     |                    |          |
| Number of columns (Genotype)           | 2                    |         |                                     |                    |          |
| Number of rows (Injury)                | 2                    |         |                                     |                    |          |

|                         |    |  |  |  |
|-------------------------|----|--|--|--|
| <b>Number of values</b> | 15 |  |  |  |
|-------------------------|----|--|--|--|

2way ANOVA of IL6 plasma

| Table Analyzed                         | IL6 plasma             |         |                                     |                    |          |
|----------------------------------------|------------------------|---------|-------------------------------------|--------------------|----------|
| <b>Two-way ANOVA</b>                   | Ordinary               |         |                                     |                    |          |
| Alpha                                  | 0,05                   |         |                                     |                    |          |
| <b>Source of Variation</b>             | % of total variation   | P value | P value summary                     | Significant?       |          |
| Interaction                            | 37,35                  | 0,0449  | *                                   | Yes                |          |
| Injury                                 | 0,2756                 | 0,8460  | ns                                  | No                 |          |
| Genotype                               | 1,308                  | 0,6735  | ns                                  | No                 |          |
| <b>ANOVA table</b>                     | SS (Type III)          | DF      | MS                                  | F (DFn, DFd)       | P value  |
| Interaction                            | 0,0003779              | 1       | 0,0003779                           | F (1, 9) = 5.416   | P=0.0449 |
| Injury                                 | 2,788E-06              | 1       | 2,788E-06                           | F (1, 9) = 0.03996 | P=0.8460 |
| Genotype                               | 1,323E-05              | 1       | 1,323E-05                           | F (1, 9) = 0.1896  | P=0.6735 |
| Residual                               | 0,0006279              | 9       | 6,977E-05                           |                    |          |
| <b>Difference between column means</b> |                        |         |                                     |                    |          |
| Predicted (LS) mean of WT              | 0,01843                |         |                                     |                    |          |
| Predicted (LS) mean of APP-SWE         | 0,02047                |         |                                     |                    |          |
| Difference between predicted means     | -0,002033              |         |                                     |                    |          |
| SE of difference                       | 0,004669               |         |                                     |                    |          |
| 95% CI of difference                   | -0.01260 to 0.008529   |         |                                     |                    |          |
| <b>Difference between row means</b>    |                        |         |                                     |                    |          |
| Predicted (LS) mean of Sham            | 0,01898                |         |                                     |                    |          |
| Predicted (LS) mean of mTBI            | 0,01992                |         |                                     |                    |          |
| Difference between predicted means     | -0,0009333             |         |                                     |                    |          |
| SE of difference                       | 0,004669               |         |                                     |                    |          |
| 95% CI of difference                   | -0.01150 to 0.009629   |         |                                     |                    |          |
| <b>Interaction CI</b>                  |                        |         |                                     |                    |          |
| Mean diff, A1 - B1                     | -0,01290               |         |                                     |                    |          |
| Mean diff, A2 - B2                     | 0,008833               |         |                                     |                    |          |
| (A1 - B1) - (A2 - B2)                  | -0,02173               |         |                                     |                    |          |
| 95% CI of difference                   | -0.04286 to -0.0006081 |         |                                     |                    |          |
| (B1 - A1) - (B2 - A2)                  | 0,02173                |         |                                     |                    |          |
| 95% CI of difference                   | 0.0006081 to 0.04286   |         |                                     |                    |          |
| <b>Normality of Residuals</b>          |                        |         |                                     |                    |          |
| Test name                              | Statistics             | P value | Passed normality test (alpha=0.05)? | P value summary    |          |
| D'Agostino-Pearson omnibus (K2)        | 0,3931                 | 0,8216  | Yes                                 | ns                 |          |
| Anderson-Darling (A2*)                 | 0,3098                 | 0,5117  | Yes                                 | ns                 |          |
| Shapiro-Wilk (W)                       | 0,9539                 | 0,6578  | Yes                                 | ns                 |          |
| Kolmogorov-Smirnov (distance)          | 0,1620                 | 0,1000  | Yes                                 | ns                 |          |
| <b>Data summary</b>                    |                        |         |                                     |                    |          |
| Number of columns (Genotype)           | 2                      |         |                                     |                    |          |
| Number of rows (Injury)                | 2                      |         |                                     |                    |          |
| Number of values                       | 13                     |         |                                     |                    |          |

2way ANOVA of AEA pmol:g cortex

| Table Analyzed                         | AEA pmol/g cortex    |         |                                     |                 |                    |
|----------------------------------------|----------------------|---------|-------------------------------------|-----------------|--------------------|
| <b>Two-way ANOVA</b>                   | Ordinary             |         |                                     |                 |                    |
| <b>Alpha</b>                           | 0,05                 |         |                                     |                 |                    |
| <b>Source of Variation</b>             | % of total variation | P value | P value summary                     | Significant?    |                    |
| <b>Interaction</b>                     | 2,322                | 0,3989  | ns                                  | No              |                    |
| <b>Injury</b>                          | 20,71                | 0,0198  | *                                   | Yes             |                    |
| <b>Genotype</b>                        | 27,53                | 0,0088  | **                                  | Yes             |                    |
| <b>ANOVA table</b>                     | SS                   | DF      | MS                                  | F (DFn, DFd)    | P value            |
| <b>Interaction</b>                     | 489,0                | 1       |                                     | 489,0           | F (1, 16) = 0.7514 |
| <b>Injury</b>                          | 4360                 | 1       |                                     | 4360            | F (1, 16) = 6.701  |
| <b>Genotype</b>                        | 5798                 | 1       |                                     | 5798            | F (1, 16) = 8.910  |
| <b>Residual</b>                        | 10412                | 16      |                                     | 650,7           |                    |
| <b>Difference between column means</b> |                      |         |                                     |                 |                    |
| <b>Mean of WT</b>                      | 43,40                |         |                                     |                 |                    |
| <b>Mean of APP-SWE</b>                 | 77,45                |         |                                     |                 |                    |
| <b>Difference between means</b>        | -34,05               |         |                                     |                 |                    |
| <b>SE of difference</b>                | 11,41                |         |                                     |                 |                    |
| <b>95% CI of difference</b>            | -58.24 to -9.869     |         |                                     |                 |                    |
| <b>Difference between row means</b>    |                      |         |                                     |                 |                    |
| <b>Mean of Sham</b>                    | 75,19                |         |                                     |                 |                    |
| <b>Mean of mTBI</b>                    | 45,66                |         |                                     |                 |                    |
| <b>Difference between means</b>        | 29,53                |         |                                     |                 |                    |
| <b>SE of difference</b>                | 11,41                |         |                                     |                 |                    |
| <b>95% CI of difference</b>            | 5.347 to 53.72       |         |                                     |                 |                    |
| <b>Interaction CI</b>                  |                      |         |                                     |                 |                    |
| <b>Mean diff, A1 - B1</b>              | -43,94               |         |                                     |                 |                    |
| <b>Mean diff, A2 - B2</b>              | -24,16               |         |                                     |                 |                    |
| <b>(A1 - B1) - (A2 - B2)</b>           | -19,78               |         |                                     |                 |                    |
| <b>95% CI of difference</b>            | -68.15 to 28.59      |         |                                     |                 |                    |
| <b>(B1 - A1) - (B2 - A2)</b>           | 19,78                |         |                                     |                 |                    |
| <b>95% CI of difference</b>            | -28.59 to 68.15      |         |                                     |                 |                    |
| <b>Normality of Residuals</b>          |                      |         |                                     |                 |                    |
| <b>Test name</b>                       | Statistics           | P value | Passed normality test (alpha=0.05)? | P value summary |                    |
| <b>D'Agostino-Pearson omnibus (K2)</b> | 12,86                | 0,0016  | No                                  | **              |                    |
| <b>Anderson-Darling (A2*)</b>          | 1,326                | 0,0014  | No                                  | **              |                    |
| <b>Shapiro-Wilk (W)</b>                | 0,8237               | 0,0020  | No                                  | **              |                    |
| <b>Kolmogorov-Smirnov (distance)</b>   | 0,2228               | 0,0104  | No                                  | *               |                    |
| <b>Data summary</b>                    |                      |         |                                     |                 |                    |

|                                     |    |  |  |  |  |
|-------------------------------------|----|--|--|--|--|
| <b>Number of columns (Genotype)</b> | 2  |  |  |  |  |
| <b>Number of rows (Injury)</b>      | 2  |  |  |  |  |
| <b>Number of values</b>             | 20 |  |  |  |  |

2way ANOVA of 2-AG pmol:mg cortex

| Table Analyzed                         | 2-AG pmol/mg cortex  |         |                                     |                    |                 |
|----------------------------------------|----------------------|---------|-------------------------------------|--------------------|-----------------|
| <b>Two-way ANOVA</b>                   | Ordinary             |         |                                     |                    |                 |
| <b>Alpha</b>                           | 0,05                 |         |                                     |                    |                 |
| <b>Source of Variation</b>             | % of total variation | P value | P value summary                     |                    | Significant?    |
| <b>Interaction</b>                     | 0,2764               | 0,7197  | ns                                  |                    | No              |
| <b>Injury</b>                          | 1,754                | 0,3711  | ns                                  |                    | No              |
| <b>Genotype</b>                        | 64,83                | <0.0001 | ****                                |                    | Yes             |
| <b>ANOVA table</b>                     | SS                   | DF      | MS                                  | F (DFn, DFd)       | P value         |
| <b>Interaction</b>                     | 0,1248               | 1       | 0,1248                              | F (1, 16) = 0.1334 | P=0.7197        |
| <b>Injury</b>                          | 0,7920               | 1       | 0,7920                              | F (1, 16) = 0.8468 | P=0.3711        |
| <b>Genotype</b>                        | 29,28                | 1       | 29,28                               | F (1, 16) = 31.31  | P<0.0001        |
| <b>Residual</b>                        | 14,97                | 16      | 0,9353                              |                    |                 |
| <b>Difference between column means</b> |                      |         |                                     |                    |                 |
| <b>Mean of WT</b>                      | 0,6600               |         |                                     |                    |                 |
| <b>Mean of APP-SWE</b>                 | 3,080                |         |                                     |                    |                 |
| <b>Difference between means</b>        | -2,420               |         |                                     |                    |                 |
| <b>SE of difference</b>                | 0,4325               |         |                                     |                    |                 |
| <b>95% CI of difference</b>            | -3.337 to -1.503     |         |                                     |                    |                 |
| <b>Difference between row means</b>    |                      |         |                                     |                    |                 |
| <b>Mean of Sham</b>                    | 2,069                |         |                                     |                    |                 |
| <b>Mean of mTBI</b>                    | 1,671                |         |                                     |                    |                 |
| <b>Difference between means</b>        | 0,3980               |         |                                     |                    |                 |
| <b>SE of difference</b>                | 0,4325               |         |                                     |                    |                 |
| <b>95% CI of difference</b>            | -0.5189 to 1.315     |         |                                     |                    |                 |
| <b>Interaction CI</b>                  |                      |         |                                     |                    |                 |
| <b>Mean diff, A1 - B1</b>              | -2,262               |         |                                     |                    |                 |
| <b>Mean diff, A2 - B2</b>              | -2,578               |         |                                     |                    |                 |
| <b>(A1 - B1) - (A2 - B2)</b>           | 0,3160               |         |                                     |                    |                 |
| <b>95% CI of difference</b>            | -1.518 to 2.150      |         |                                     |                    |                 |
| <b>(B1 - A1) - (B2 - A2)</b>           | -0,3160              |         |                                     |                    |                 |
| <b>95% CI of difference</b>            | -2.150 to 1.518      |         |                                     |                    |                 |
| <b>Normality of Residuals</b>          |                      |         |                                     |                    |                 |
| <b>Test name</b>                       | Statistics           | P value | Passed normality test (alpha=0.05)? |                    | P value summary |
| <b>D'Agostino-Pearson omnibus (K2)</b> | 7,349                | 0,0254  | No                                  |                    | *               |
| <b>Anderson-Darling (A2*)</b>          | 0,7249               | 0,0492  | No                                  |                    | *               |
| <b>Shapiro-Wilk (W)</b>                | 0,9030               | 0,0470  | No                                  |                    | *               |
| <b>Kolmogorov-Smirnov (distance)</b>   | 0,1813               | 0,0837  | Yes                                 |                    | ns              |
| <b>Data summary</b>                    |                      |         |                                     |                    |                 |
| <b>Number of columns (Genotype)</b>    | 2                    |         |                                     |                    |                 |
| <b>Number of rows (Injury)</b>         | 2                    |         |                                     |                    |                 |

|                         |    |  |  |  |
|-------------------------|----|--|--|--|
| <b>Number of values</b> | 20 |  |  |  |
|-------------------------|----|--|--|--|

2way ANOVA of PEA pmol:mg cortex

| Table Analyzed                         | PEA pmol/mg cortex   |         |                                     |  |                             |
|----------------------------------------|----------------------|---------|-------------------------------------|--|-----------------------------|
| <b>Two-way ANOVA</b>                   | Ordinary             |         |                                     |  |                             |
| <b>Alpha</b>                           | 0,05                 |         |                                     |  |                             |
| <b>Source of Variation</b>             | % of total variation | P value | P value summary                     |  | Significant?                |
| <b>Interaction</b>                     | 1,460                | 0,5533  | ns                                  |  | No                          |
| <b>Injury</b>                          | 12,58                | 0,0945  | ns                                  |  | No                          |
| <b>Genotype</b>                        | 22,24                | 0,0311  | *                                   |  | Yes                         |
| <b>ANOVA table</b>                     | SS                   | DF      | MS                                  |  | F (DFn, DFd) P value        |
| <b>Interaction</b>                     | 0,004805             | 1       | 0,004805                            |  | F (1, 16) = 0.3667 P=0.5533 |
| <b>Injury</b>                          | 0,04141              | 1       | 0,04141                             |  | F (1, 16) = 3.159 P=0.0945  |
| <b>Genotype</b>                        | 0,07321              | 1       | 0,07321                             |  | F (1, 16) = 5.586 P=0.0311  |
| <b>Residual</b>                        | 0,2097               | 16      | 0,01311                             |  |                             |
| <b>Difference between column means</b> |                      |         |                                     |  |                             |
| <b>Mean of WT</b>                      | 0,3710               |         |                                     |  |                             |
| <b>Mean of APP-SWE</b>                 | 0,2500               |         |                                     |  |                             |
| <b>Difference between means</b>        | 0,1210               |         |                                     |  |                             |
| <b>SE of difference</b>                | 0,05120              |         |                                     |  |                             |
| <b>95% CI of difference</b>            | 0.01247 to 0.2295    |         |                                     |  |                             |
| <b>Difference between row means</b>    |                      |         |                                     |  |                             |
| <b>Mean of Sham</b>                    | 0,3560               |         |                                     |  |                             |
| <b>Mean of mTBI</b>                    | 0,2650               |         |                                     |  |                             |
| <b>Difference between means</b>        | 0,09100              |         |                                     |  |                             |
| <b>SE of difference</b>                | 0,05120              |         |                                     |  |                             |
| <b>95% CI of difference</b>            | -0.01753 to 0.1995   |         |                                     |  |                             |
| <b>Interaction CI</b>                  |                      |         |                                     |  |                             |
| <b>Mean diff, A1 - B1</b>              | 0,1520               |         |                                     |  |                             |
| <b>Mean diff, A2 - B2</b>              | 0,09000              |         |                                     |  |                             |
| <b>(A1 - B1) - (A2 - B2)</b>           | 0,06200              |         |                                     |  |                             |
| <b>95% CI of difference</b>            | -0.1551 to 0.2791    |         |                                     |  |                             |
| <b>(B1 - A1) - (B2 - A2)</b>           | -0,06200             |         |                                     |  |                             |
| <b>95% CI of difference</b>            | -0.2791 to 0.1551    |         |                                     |  |                             |
| <b>Normality of Residuals</b>          |                      |         |                                     |  |                             |
| <b>Test name</b>                       | Statistics           | P value | Passed normality test (alpha=0.05)? |  | P value summary             |
| <b>D'Agostino-Pearson omnibus (K2)</b> | 13,13                | 0,0014  | No                                  |  | **                          |
| <b>Anderson-Darling (A2*)</b>          | 0,9306               | 0,0145  | No                                  |  | *                           |
| <b>Shapiro-Wilk (W)</b>                | 0,8671               | 0,0105  | No                                  |  | *                           |
| <b>Kolmogorov-Smirnov (distance)</b>   | 0,2121               | 0,0188  | No                                  |  | *                           |
| <b>Data summary</b>                    |                      |         |                                     |  |                             |
| <b>Number of columns (Genotype)</b>    | 2                    |         |                                     |  |                             |

|                                |    |  |  |  |  |
|--------------------------------|----|--|--|--|--|
| <b>Number of rows (Injury)</b> | 2  |  |  |  |  |
| <b>Number of values</b>        | 20 |  |  |  |  |

2way ANOVA of OEA pmol:mg cortex

| Table Analyzed                         | OEA pmol/mg cortex   |         |                                     |                 |                               |
|----------------------------------------|----------------------|---------|-------------------------------------|-----------------|-------------------------------|
| <b>Two-way ANOVA</b>                   | Ordinary             |         |                                     |                 |                               |
| <b>Alpha</b>                           | 0,05                 |         |                                     |                 |                               |
| <b>Source of Variation</b>             | % of total variation | P value | P value summary                     | Significant?    |                               |
| <b>Interaction</b>                     | 5,327                | 0,1518  | ns                                  | No              |                               |
| <b>Injury</b>                          | 9,109                | 0,0666  | ns                                  | No              |                               |
| <b>Genotype</b>                        | 47,94                | 0,0004  | ***                                 | Yes             |                               |
| <b>ANOVA table</b>                     | SS                   | DF      | MS                                  | F (DFn, DFd)    | P value                       |
| <b>Interaction</b>                     | 0,02113              | 1       |                                     | 0,02113         | F (1, 16) = 2.265<br>P=0.1518 |
| <b>Injury</b>                          | 0,03613              | 1       |                                     | 0,03613         | F (1, 16) = 3.874<br>P=0.0666 |
| <b>Genotype</b>                        | 0,1901               | 1       |                                     | 0,1901          | F (1, 16) = 20.39<br>P=0.0004 |
| <b>Residual</b>                        | 0,1492               | 16      |                                     | 0,009325        |                               |
| <b>Difference between column means</b> |                      |         |                                     |                 |                               |
| <b>Mean of WT</b>                      | 0,2350               |         |                                     |                 |                               |
| <b>Mean of APP-SWE</b>                 | 0,4300               |         |                                     |                 |                               |
| <b>Difference between means</b>        | -0,1950              |         |                                     |                 |                               |
| <b>SE of difference</b>                | 0,04319              |         |                                     |                 |                               |
| <b>95% CI of difference</b>            | -0.2865 to -0.1035   |         |                                     |                 |                               |
| <b>Difference between row means</b>    |                      |         |                                     |                 |                               |
| <b>Mean of Sham</b>                    | 0,3750               |         |                                     |                 |                               |
| <b>Mean of mTBI</b>                    | 0,2900               |         |                                     |                 |                               |
| <b>Difference between means</b>        | 0,08500              |         |                                     |                 |                               |
| <b>SE of difference</b>                | 0,04319              |         |                                     |                 |                               |
| <b>95% CI of difference</b>            | -0.006549 to 0.1765  |         |                                     |                 |                               |
| <b>Interaction CI</b>                  |                      |         |                                     |                 |                               |
| <b>Mean diff, A1 - B1</b>              | -0,1300              |         |                                     |                 |                               |
| <b>Mean diff, A2 - B2</b>              | -0,2600              |         |                                     |                 |                               |
| <b>(A1 - B1) - (A2 - B2)</b>           | 0,1300               |         |                                     |                 |                               |
| <b>95% CI of difference</b>            | -0.05310 to 0.3131   |         |                                     |                 |                               |
| <b>(B1 - A1) - (B2 - A2)</b>           | -0,1300              |         |                                     |                 |                               |
| <b>95% CI of difference</b>            | -0.3131 to 0.05310   |         |                                     |                 |                               |
| <b>Normality of Residuals</b>          |                      |         |                                     |                 |                               |
| <b>Test name</b>                       | Statistics           | P value | Passed normality test (alpha=0.05)? | P value summary |                               |
| <b>D'Agostino-Pearson omnibus (K2)</b> | 11,54                | 0,0031  | No                                  | **              |                               |
| <b>Anderson-Darling (A2*)</b>          | 1,251                | 0,0022  | No                                  | **              |                               |
| <b>Shapiro-Wilk (W)</b>                | 0,8574               | 0,0071  | No                                  | **              |                               |
| <b>Kolmogorov-Smirnov (distance)</b>   | 0,2500               | 0,0020  | No                                  | **              |                               |
| <b>Data summary</b>                    |                      |         |                                     |                 |                               |
| <b>Number of columns (Genotype)</b>    | 2                    |         |                                     |                 |                               |

|                                |    |  |  |  |  |
|--------------------------------|----|--|--|--|--|
| <b>Number of rows (Injury)</b> | 2  |  |  |  |  |
| <b>Number of values</b>        | 20 |  |  |  |  |

2way ANOVA of DHEA pmol:mg cortex

| Table Analyzed                         | DHEA pmol/mg cortex  |         |                                     |              |                               |
|----------------------------------------|----------------------|---------|-------------------------------------|--------------|-------------------------------|
| <b>Two-way ANOVA</b>                   | Ordinary             |         |                                     |              |                               |
| <b>Alpha</b>                           | 0,05                 |         |                                     |              |                               |
| <b>Source of Variation</b>             | % of total variation | P value | P value summary                     |              | Significant?                  |
| <b>Interaction</b>                     | 0,01510              | 0,9548  | ns                                  |              | No                            |
| <b>Injury</b>                          | 4,720                | 0,3240  | ns                                  |              | No                            |
| <b>Genotype</b>                        | 22,34                | 0,0417  | *                                   |              | Yes                           |
| <b>ANOVA table</b>                     | SS                   | DF      | MS                                  | F (DFn, DFd) | P value                       |
| <b>Interaction</b>                     | 3,802E-05            | 1       |                                     | 3,802E-05    | F (1, 16) = 0.003312 P=0.9548 |
| <b>Injury</b>                          | 0,01189              | 1       |                                     | 0,01189      | F (1, 16) = 1.035 P=0.3240    |
| <b>Genotype</b>                        | 0,05626              | 1       |                                     | 0,05626      | F (1, 16) = 4.901 P=0.0417    |
| <b>Residual</b>                        | 0,1837               | 16      |                                     | 0,01148      |                               |
| <b>Difference between column means</b> |                      |         |                                     |              |                               |
| <b>Mean of WT</b>                      | 0,2430               |         |                                     |              |                               |
| <b>Mean of APP-SWE</b>                 | 0,3491               |         |                                     |              |                               |
| <b>Difference between means</b>        | -0,1061              |         |                                     |              |                               |
| <b>SE of difference</b>                | 0,04792              |         |                                     |              |                               |
| <b>95% CI of difference</b>            | -0.2076 to -0.004496 |         |                                     |              |                               |
| <b>Difference between row means</b>    |                      |         |                                     |              |                               |
| <b>Mean of Sham</b>                    | 0,3204               |         |                                     |              |                               |
| <b>Mean of mTBI</b>                    | 0,2717               |         |                                     |              |                               |
| <b>Difference between means</b>        | 0,04876              |         |                                     |              |                               |
| <b>SE of difference</b>                | 0,04792              |         |                                     |              |                               |
| <b>95% CI of difference</b>            | -0.05282 to 0.1503   |         |                                     |              |                               |
| <b>Interaction CI</b>                  |                      |         |                                     |              |                               |
| <b>Mean diff, A1 - B1</b>              | -0,1088              |         |                                     |              |                               |
| <b>Mean diff, A2 - B2</b>              | -0,1033              |         |                                     |              |                               |
| <b>(A1 - B1) - (A2 - B2)</b>           | -0,005515            |         |                                     |              |                               |
| <b>95% CI of difference</b>            | -0.2087 to 0.1976    |         |                                     |              |                               |
| <b>(B1 - A1) - (B2 - A2)</b>           | 0,005515             |         |                                     |              |                               |
| <b>95% CI of difference</b>            | -0.1976 to 0.2087    |         |                                     |              |                               |
| <b>Normality of Residuals</b>          |                      |         |                                     |              |                               |
| <b>Test name</b>                       | Statistics           | P value | Passed normality test (alpha=0.05)? |              | P value summary               |
| <b>D'Agostino-Pearson omnibus (K2)</b> | 2,619                | 0,2700  | Yes                                 |              | ns                            |
| <b>Anderson-Darling (A2*)</b>          | 0,4596               | 0,2344  | Yes                                 |              | ns                            |
| <b>Shapiro-Wilk (W)</b>                | 0,9361               | 0,2019  | Yes                                 |              | ns                            |
| <b>Kolmogorov-Smirnov (distance)</b>   | 0,1404               | 0,1000  | Yes                                 |              | ns                            |
| <b>Data summary</b>                    |                      |         |                                     |              |                               |
| <b>Number of columns (Genotype)</b>    | 2                    |         |                                     |              |                               |
| <b>Number of rows (Injury)</b>         | 2                    |         |                                     |              |                               |
| <b>Number of values</b>                | 20                   |         |                                     |              |                               |

2way ANOVA of EPEA pmol:mg cortex

| Table Analyzed                         | EPEA pmol/mg cortex   |         |                                     |                   |                 |
|----------------------------------------|-----------------------|---------|-------------------------------------|-------------------|-----------------|
| <b>Two-way ANOVA</b>                   | Ordinary              |         |                                     |                   |                 |
| <b>Alpha</b>                           | 0,05                  |         |                                     |                   |                 |
| <b>Source of Variation</b>             | % of total variation  | P value | P value summary                     |                   | Significant?    |
| <b>Interaction</b>                     | 13,31                 | 0,0273  | *                                   |                   | Yes             |
| <b>Injury</b>                          | 26,31                 | 0,0036  | **                                  |                   | Yes             |
| <b>Genotype</b>                        | 24,26                 | 0,0047  | **                                  |                   | Yes             |
| <b>ANOVA table</b>                     | SS                    | DF      | MS                                  | F (DFn, DFd)      | P value         |
| <b>Interaction</b>                     | 0,0001468             | 1       | 0,0001468                           | F (1, 16) = 5.897 | P=0.0273        |
| <b>Injury</b>                          | 0,0002902             | 1       | 0,0002902                           | F (1, 16) = 11.66 | P=0.0036        |
| <b>Genotype</b>                        | 0,0002675             | 1       | 0,0002675                           | F (1, 16) = 10.75 | P=0.0047        |
| <b>Residual</b>                        | 0,0003983             | 16      | 2,489E-05                           |                   |                 |
| <b>Difference between column means</b> |                       |         |                                     |                   |                 |
| <b>Mean of WT</b>                      | 0,006900              |         |                                     |                   |                 |
| <b>Mean of APP-SWE</b>                 | 0,01421               |         |                                     |                   |                 |
| <b>Difference between means</b>        | -0,007315             |         |                                     |                   |                 |
| <b>SE of difference</b>                | 0,002231              |         |                                     |                   |                 |
| <b>95% CI of difference</b>            | -0.01204 to -0.002585 |         |                                     |                   |                 |
| <b>Difference between row means</b>    |                       |         |                                     |                   |                 |
| <b>Mean of Sham</b>                    | 0,01437               |         |                                     |                   |                 |
| <b>Mean of mTBI</b>                    | 0,006748              |         |                                     |                   |                 |
| <b>Difference between means</b>        | 0,007618              |         |                                     |                   |                 |
| <b>SE of difference</b>                | 0,002231              |         |                                     |                   |                 |
| <b>95% CI of difference</b>            | 0.002888 to 0.01235   |         |                                     |                   |                 |
| <b>Interaction CI</b>                  |                       |         |                                     |                   |                 |
| <b>Mean diff, A1 - B1</b>              | -0,01273              |         |                                     |                   |                 |
| <b>Mean diff, A2 - B2</b>              | -0,001897             |         |                                     |                   |                 |
| <b>(A1 - B1) - (A2 - B2)</b>           | -0,01084              |         |                                     |                   |                 |
| <b>95% CI of difference</b>            | -0.02030 to -0.001377 |         |                                     |                   |                 |
| <b>(B1 - A1) - (B2 - A2)</b>           | 0,01084               |         |                                     |                   |                 |
| <b>95% CI of difference</b>            | 0.001377 to 0.02030   |         |                                     |                   |                 |
| <b>Normality of Residuals</b>          |                       |         |                                     |                   |                 |
| <b>Test name</b>                       | Statistics            | P value | Passed normality test (alpha=0.05)? |                   | P value summary |
| <b>D'Agostino-Pearson omnibus (K2)</b> | 0,9544                | 0,6205  | Yes                                 |                   | ns              |
| <b>Anderson-Darling (A2*)</b>          | 0,3318                | 0,4827  | Yes                                 |                   | ns              |
| <b>Shapiro-Wilk (W)</b>                | 0,9605                | 0,5542  | Yes                                 |                   | ns              |
| <b>Kolmogorov-Smirnov (distance)</b>   | 0,1326                | 0,1000  | Yes                                 |                   | ns              |
| <b>Data summary</b>                    |                       |         |                                     |                   |                 |
| <b>Number of columns (Genotype)</b>    | 2                     |         |                                     |                   |                 |
| <b>Number of rows (Injury)</b>         | 2                     |         |                                     |                   |                 |

|                         |    |  |  |  |
|-------------------------|----|--|--|--|
| <b>Number of values</b> | 20 |  |  |  |
|-------------------------|----|--|--|--|

2way ANOVA of 2-DHG pmol:mg cortex

| Compare cell means regardless of rows and columns |            |                    |                  |             |                  |    |        |       |
|---------------------------------------------------|------------|--------------------|------------------|-------------|------------------|----|--------|-------|
| <b>Number of families</b>                         | 1          |                    |                  |             |                  |    |        |       |
| <b>Number of comparisons per family</b>           | 6          |                    |                  |             |                  |    |        |       |
| <b>Alpha</b>                                      | 0,05       |                    |                  |             |                  |    |        |       |
| <b>Tukey's multiple comparisons test</b>          | Mean Diff. | 95.00% CI of diff. | Below threshold? | Summary     | Adjusted P Value |    |        |       |
| <b>Sham:WT vs. Sham:APP-SWE</b>                   | -5,810     | -19.19 to 7.573    | No               | ns          | 0,6105           |    |        |       |
| <b>Sham:WT vs. mTBI:WT</b>                        | -5,014     | -18.40 to 8.369    | No               | ns          | 0,7109           |    |        |       |
| <b>Sham:WT vs. mTBI:APP-SWE</b>                   | 0,6700     | -12.71 to 14.05    | No               | ns          | 0,9989           |    |        |       |
| <b>Sham:APP-SWE vs. mTBI:WT</b>                   | 0,7960     | -12.59 to 14.18    | No               | ns          | 0,9982           |    |        |       |
| <b>Sham:APP-SWE vs. mTBI:APP-SWE</b>              | 6,480      | -6.903 to 19.86    | No               | ns          | 0,5257           |    |        |       |
| <b>mTBI:WT vs. mTBI:APP-SWE</b>                   | 5,684      | -7.699 to 19.07    | No               | ns          | 0,6266           |    |        |       |
| <b>Test details</b>                               | Mean 1     | Mean 2             | Mean Diff.       | SE of diff. | N1               | N2 | q      | DF    |
| <b>Sham:WT vs. Sham:APP-SWE</b>                   | 11,97      | 17,78              | -5,810           | 4,678       | 5                | 5  | 1,757  | 16,00 |
| <b>Sham:WT vs. mTBI:WT</b>                        | 11,97      | 16,98              | -5,014           | 4,678       | 5                | 5  | 1,516  | 16,00 |
| <b>Sham:WT vs. mTBI:APP-SWE</b>                   | 11,97      | 11,30              | 0,6700           | 4,678       | 5                | 5  | 0,2026 | 16,00 |
| <b>Sham:APP-SWE vs. mTBI:WT</b>                   | 17,78      | 16,98              | 0,7960           | 4,678       | 5                | 5  | 0,2407 | 16,00 |
| <b>Sham:APP-SWE vs. mTBI:APP-SWE</b>              | 17,78      | 11,30              | 6,480            | 4,678       | 5                | 5  | 1,959  | 16,00 |
| <b>mTBI:WT vs. mTBI:APP-SWE</b>                   | 16,98      | 11,30              | 5,684            | 4,678       | 5                | 5  | 1,718  | 16,00 |

2way ANOVA of OIGly pmol:mg cortex

| Compare cell means regardless of rows and columns |            |                    |                  |             |                  |    |        |       |
|---------------------------------------------------|------------|--------------------|------------------|-------------|------------------|----|--------|-------|
| <b>Number of families</b>                         | 1          |                    |                  |             |                  |    |        |       |
| <b>Number of comparisons per family</b>           | 6          |                    |                  |             |                  |    |        |       |
| <b>Alpha</b>                                      | 0,05       |                    |                  |             |                  |    |        |       |
| <b>Tukey's multiple comparisons test</b>          | Mean Diff. | 95.00% CI of diff. | Below threshold? | Summary     | Adjusted P Value |    |        |       |
| <b>Sham:WT vs. Sham:APP-SWE</b>                   | -0,3860    | -1.785 to 1.013    | No               | ns          | 0,8582           |    |        |       |
| <b>Sham:WT vs. mTBI:WT</b>                        | 0,4740     | -0.9251 to 1.873   | No               | ns          | 0,7684           |    |        |       |
| <b>Sham:WT vs. mTBI:APP-SWE</b>                   | -0,3060    | -1.705 to 1.093    | No               | ns          | 0,9223           |    |        |       |
| <b>Sham:APP-SWE vs. mTBI:WT</b>                   | 0,8600     | -0.5391 to 2.259   | No               | ns          | 0,3279           |    |        |       |
| <b>Sham:APP-SWE vs. mTBI:APP-SWE</b>              | 0,08000    | -1.319 to 1.479    | No               | ns          | 0,9984           |    |        |       |
| <b>mTBI:WT vs. mTBI:APP-SWE</b>                   | -0,7800    | -2.179 to 0.6191   | No               | ns          | 0,4088           |    |        |       |
| <b>Test details</b>                               | Mean 1     | Mean 2             | Mean Diff.       | SE of diff. | N1               | N2 | q      | DF    |
| <b>Sham:WT vs. Sham:APP-SWE</b>                   | 1,634      | 2,020              | -0,3860          | 0,4890      | 5                | 5  | 1,116  | 16,00 |
| <b>Sham:WT vs. mTBI:WT</b>                        | 1,634      | 1,160              | 0,4740           | 0,4890      | 5                | 5  | 1,371  | 16,00 |
| <b>Sham:WT vs. mTBI:APP-SWE</b>                   | 1,634      | 1,940              | -0,3060          | 0,4890      | 5                | 5  | 0,8849 | 16,00 |
| <b>Sham:APP-SWE vs. mTBI:WT</b>                   | 2,020      | 1,160              | 0,8600           | 0,4890      | 5                | 5  | 2,487  | 16,00 |
| <b>Sham:APP-SWE vs. mTBI:APP-SWE</b>              | 2,020      | 1,940              | 0,08000          | 0,4890      | 5                | 5  | 0,2313 | 16,00 |
| <b>mTBI:WT vs. mTBI:APP-SWE</b>                   | 1,160      | 1,940              | -0,7800          | 0,4890      | 5                | 5  | 2,256  | 16,00 |

2way ANOVA of OA5HT pmol:mg cortex

| Table Analyzed                            | OA5HT pmol/mg cortex |         |                                     |                   |          |
|-------------------------------------------|----------------------|---------|-------------------------------------|-------------------|----------|
| <b>Two-way ANOVA</b>                      | Ordinary             |         |                                     |                   |          |
| <b>Alpha</b>                              | 0,05                 |         |                                     |                   |          |
| <b>Source of Variation</b>                | % of total variation | P value | P value summary                     | Significant?      |          |
| <b>Interaction</b>                        | 30,68                | 0,0006  | ***                                 | Yes               |          |
| <b>Injury</b>                             | 30,92                | 0,0006  | ***                                 | Yes               |          |
| <b>Genotype</b>                           | 33,14                | 0,0005  | ***                                 | Yes               |          |
| <b>ANOVA table</b>                        | SS (Type III)        | DF      | MS                                  | F (DFn, DFd)      | P value  |
| <b>Interaction</b>                        | 813,6                | 1       | 813,6                               | F (1, 12) = 20.95 | P=0.0006 |
| <b>Injury</b>                             | 820,0                | 1       | 820,0                               | F (1, 12) = 21.12 | P=0.0006 |
| <b>Genotype</b>                           | 878,8                | 1       | 878,8                               | F (1, 12) = 22.64 | P=0.0005 |
| <b>Residual</b>                           | 465,9                | 12      | 38,83                               |                   |          |
| <b>Difference between column means</b>    |                      |         |                                     |                   |          |
| <b>Predicted (LS) mean of WT</b>          | 15,66                |         |                                     |                   |          |
| <b>Predicted (LS) mean of APP-SWE</b>     | 0,3530               |         |                                     |                   |          |
| <b>Difference between predicted means</b> | 15,31                |         |                                     |                   |          |
| <b>SE of difference</b>                   | 3,218                |         |                                     |                   |          |
| <b>95% CI of difference</b>               | 8.298 to 22.32       |         |                                     |                   |          |
| <b>Difference between row means</b>       |                      |         |                                     |                   |          |
| <b>Predicted (LS) mean of Sham</b>        | 0,6137               |         |                                     |                   |          |
| <b>Predicted (LS) mean of mTBI</b>        | 15,40                |         |                                     |                   |          |
| <b>Difference between predicted means</b> | -14,79               |         |                                     |                   |          |
| <b>SE of difference</b>                   | 3,218                |         |                                     |                   |          |
| <b>95% CI of difference</b>               | -21.80 to -7.777     |         |                                     |                   |          |
| <b>Interaction CI</b>                     |                      |         |                                     |                   |          |
| <b>Mean diff, A1 - B1</b>                 | 0,5793               |         |                                     |                   |          |
| <b>Mean diff, A2 - B2</b>                 | 30,04                |         |                                     |                   |          |
| <b>(A1 - B1) - (A2 - B2)</b>              | -29,46               |         |                                     |                   |          |
| <b>95% CI of difference</b>               | -43.48 to -15.44     |         |                                     |                   |          |
| <b>(B1 - A1) - (B2 - A2)</b>              | 29,46                |         |                                     |                   |          |
| <b>95% CI of difference</b>               | 15.44 to 43.48       |         |                                     |                   |          |
| <b>Normality of Residuals</b>             |                      |         |                                     |                   |          |
| <b>Test name</b>                          | Statistics           | P value | Passed normality test (alpha=0.05)? | P value summary   |          |
| <b>D'Agostino-Pearson omnibus (K2)</b>    | 19,11                | <0.0001 | No                                  | ****              |          |
| <b>Anderson-Darling (A2*)</b>             | 3,030                | <0.0001 | No                                  | ****              |          |
| <b>Shapiro-Wilk (W)</b>                   | 0,6034               | <0.0001 | No                                  | ****              |          |
| <b>Kolmogorov-Smirnov (distance)</b>      | 0,3963               | <0.0001 | No                                  | ****              |          |
| <b>Data summary</b>                       |                      |         |                                     |                   |          |
| <b>Number of columns (Genotype)</b>       | 2                    |         |                                     |                   |          |
| <b>Number of rows (Injury)</b>            | 2                    |         |                                     |                   |          |
| <b>Number of values</b>                   | 16                   |         |                                     |                   |          |

2way ANOVA of DHA5HT pmol:mg cortex

| Table Analyzed                            | DHA5HT pmol/mg cortex |         |                                     |                   |          |
|-------------------------------------------|-----------------------|---------|-------------------------------------|-------------------|----------|
| <b>Two-way ANOVA</b>                      | Ordinary              |         |                                     |                   |          |
| <b>Alpha</b>                              | 0,05                  |         |                                     |                   |          |
| <b>Source of Variation</b>                | % of total variation  | P value | P value summary                     | Significant?      |          |
| <b>Interaction</b>                        | 23,55                 | 0,0194  | *                                   | Yes               |          |
| <b>Injury</b>                             | 23,32                 | 0,0199  | *                                   | Yes               |          |
| <b>Genotype</b>                           | 25,97                 | 0,0152  | *                                   | Yes               |          |
| <b>ANOVA table</b>                        | SS (Type III)         | DF      | MS                                  | F (DFn, DFd)      | P value  |
| <b>Interaction</b>                        | 4146                  | 1       | 4146                                | F (1, 11) = 7.475 | P=0.0194 |
| <b>Injury</b>                             | 4106                  | 1       | 4106                                | F (1, 11) = 7.404 | P=0.0199 |
| <b>Genotype</b>                           | 4572                  | 1       | 4572                                | F (1, 11) = 8.244 | P=0.0152 |
| <b>Residual</b>                           | 6101                  | 11      | 554,6                               |                   |          |
| <b>Difference between column means</b>    |                       |         |                                     |                   |          |
| <b>Predicted (LS) mean of WT</b>          | 36,24                 |         |                                     |                   |          |
| <b>Predicted (LS) mean of APP-SWE</b>     | 0,5110                |         |                                     |                   |          |
| <b>Difference between predicted means</b> | 35,73                 |         |                                     |                   |          |
| <b>SE of difference</b>                   | 12,44                 |         |                                     |                   |          |
| <b>95% CI of difference</b>               | 8.341 to 63.11        |         |                                     |                   |          |
| <b>Difference between row means</b>       |                       |         |                                     |                   |          |
| <b>Predicted (LS) mean of Sham</b>        | 1,446                 |         |                                     |                   |          |
| <b>Predicted (LS) mean of mTBI</b>        | 35,30                 |         |                                     |                   |          |
| <b>Difference between predicted means</b> | -33,86                |         |                                     |                   |          |
| <b>SE of difference</b>                   | 12,44                 |         |                                     |                   |          |
| <b>95% CI of difference</b>               | -61.24 to -6.471      |         |                                     |                   |          |
| <b>Interaction CI</b>                     |                       |         |                                     |                   |          |
| <b>Mean diff, A1 - B1</b>                 | 1,708                 |         |                                     |                   |          |
| <b>Mean diff, A2 - B2</b>                 | 69,75                 |         |                                     |                   |          |
| <b>(A1 - B1) - (A2 - B2)</b>              | -68,04                |         |                                     |                   |          |
| <b>95% CI of difference</b>               | -122.8 to -13.27      |         |                                     |                   |          |
| <b>(B1 - A1) - (B2 - A2)</b>              | 68,04                 |         |                                     |                   |          |
| <b>95% CI of difference</b>               | 13.27 to 122.8        |         |                                     |                   |          |
| <b>Normality of Residuals</b>             |                       |         |                                     |                   |          |
| <b>Test name</b>                          | Statistics            | P value | Passed normality test (alpha=0.05)? | P value summary   |          |
| <b>D'Agostino-Pearson omnibus (K2)</b>    | 13,72                 | 0,0010  | No                                  | **                |          |
| <b>Anderson-Darling (A2*)</b>             | 2,880                 | <0.0001 | No                                  | ****              |          |
| <b>Shapiro-Wilk (W)</b>                   | 0,6227                | <0.0001 | No                                  | ****              |          |
| <b>Kolmogorov-Smirnov (distance)</b>      | 0,3982                | <0.0001 | No                                  | ****              |          |
| <b>Data summary</b>                       |                       |         |                                     |                   |          |
| <b>Number of columns (Genotype)</b>       | 2                     |         |                                     |                   |          |
| <b>Number of rows (Injury)</b>            | 2                     |         |                                     |                   |          |
| <b>Number of values</b>                   | 15                    |         |                                     |                   |          |

2way ANOVA of EPA5HT pmol:mg cortex

| Table Analyzed                            | EPA5HT pmol/mg cortex |         |                                     |                    |          |
|-------------------------------------------|-----------------------|---------|-------------------------------------|--------------------|----------|
| <b>Two-way ANOVA</b>                      | Ordinary              |         |                                     |                    |          |
| <b>Alpha</b>                              | 0,05                  |         |                                     |                    |          |
| <b>Source of Variation</b>                | % of total variation  | P value | P value summary                     | Significant?       |          |
| <b>Interaction</b>                        | 2,347                 | 0,4340  | ns                                  | No                 |          |
| <b>Injury</b>                             | 3,059                 | 0,3733  | ns                                  | No                 |          |
| <b>Genotype</b>                           | 37,86                 | 0,0056  | **                                  | Yes                |          |
| <b>ANOVA table</b>                        | SS (Type III)         | DF      | MS                                  | F (DFn, DFd)       | P value  |
| <b>Interaction</b>                        | 0,7361                | 1       | 0,7361                              | F (1, 15) = 0.6462 | P=0.4340 |
| <b>Injury</b>                             | 0,9593                | 1       | 0,9593                              | F (1, 15) = 0.8421 | P=0.3733 |
| <b>Genotype</b>                           | 11,87                 | 1       | 11,87                               | F (1, 15) = 10.42  | P=0.0056 |
| <b>Residual</b>                           | 17,09                 | 15      | 1,139                               |                    |          |
| <b>Difference between column means</b>    |                       |         |                                     |                    |          |
| <b>Predicted (LS) mean of WT</b>          | 2,869                 |         |                                     |                    |          |
| <b>Predicted (LS) mean of APP-SWE</b>     | 1,280                 |         |                                     |                    |          |
| <b>Difference between predicted means</b> | 1,589                 |         |                                     |                    |          |
| <b>SE of difference</b>                   | 0,4920                |         |                                     |                    |          |
| <b>95% CI of difference</b>               | 0.5398 to 2.637       |         |                                     |                    |          |
| <b>Difference between row means</b>       |                       |         |                                     |                    |          |
| <b>Predicted (LS) mean of Sham</b>        | 2,300                 |         |                                     |                    |          |
| <b>Predicted (LS) mean of mTBI</b>        | 1,849                 |         |                                     |                    |          |
| <b>Difference between predicted means</b> | 0,4515                |         |                                     |                    |          |
| <b>SE of difference</b>                   | 0,4920                |         |                                     |                    |          |
| <b>95% CI of difference</b>               | -0.5972 to 1.500      |         |                                     |                    |          |
| <b>Interaction CI</b>                     |                       |         |                                     |                    |          |
| <b>Mean diff, A1 - B1</b>                 | 1,984                 |         |                                     |                    |          |
| <b>Mean diff, A2 - B2</b>                 | 1,193                 |         |                                     |                    |          |
| <b>(A1 - B1) - (A2 - B2)</b>              | 0,7910                |         |                                     |                    |          |
| <b>95% CI of difference</b>               | -1.306 to 2.888       |         |                                     |                    |          |
| <b>(B1 - A1) - (B2 - A2)</b>              | -0,7910               |         |                                     |                    |          |
| <b>95% CI of difference</b>               | -2.888 to 1.306       |         |                                     |                    |          |
| <b>Normality of Residuals</b>             |                       |         |                                     |                    |          |
| <b>Test name</b>                          | Statistics            | P value | Passed normality test (alpha=0.05)? | P value summary    |          |
| <b>D'Agostino-Pearson omnibus (K2)</b>    | 1,022                 | 0,5999  | Yes                                 | ns                 |          |
| <b>Anderson-Darling (A2*)</b>             | 0,2116                | 0,8319  | Yes                                 | ns                 |          |
| <b>Shapiro-Wilk (W)</b>                   | 0,9809                | 0,9525  | Yes                                 | ns                 |          |
| <b>Kolmogorov-Smirnov (distance)</b>      | 0,1041                | 0,1000  | Yes                                 | ns                 |          |
| <b>Data summary</b>                       |                       |         |                                     |                    |          |
| <b>Number of columns (Genotype)</b>       | 2                     |         |                                     |                    |          |
| <b>Number of rows (Injury)</b>            | 2                     |         |                                     |                    |          |
| <b>Number of values</b>                   | 19                    |         |                                     |                    |          |

2way ANOVA of PA5HT pmol:mg cortex

| Compare cell means regardless of rows and columns |                           |                       |                           |             |                  |    |         |       |
|---------------------------------------------------|---------------------------|-----------------------|---------------------------|-------------|------------------|----|---------|-------|
| <b>Number of families</b>                         | 1                         |                       |                           |             |                  |    |         |       |
| <b>Number of comparisons per family</b>           | 6                         |                       |                           |             |                  |    |         |       |
| <b>Alpha</b>                                      | 0,05                      |                       |                           |             |                  |    |         |       |
| <b>Tukey's multiple comparisons test</b>          | Predicted (LS) mean diff. | 95.00% CI of diff.    | Below threshold?          | Summary     | Adjusted P Value |    |         |       |
| <b>Sham:WT vs. Sham:APP-SWE</b>                   | -21,60                    | -58.52 to 15.32       | No                        | ns          | 0,3596           |    |         |       |
| <b>Sham:WT vs. mTBI:WT</b>                        | -0,5885                   | -37.51 to 36.33       | No                        | ns          | >0.9999          |    |         |       |
| <b>Sham:WT vs. mTBI:APP-SWE</b>                   | -1,388                    | -40.30 to 37.53       | No                        | ns          | 0,9996           |    |         |       |
| <b>Sham:APP-SWE vs. mTBI:WT</b>                   | 21,01                     | -13.80 to 55.82       | No                        | ns          | 0,3342           |    |         |       |
| <b>Sham:APP-SWE vs. mTBI:APP-SWE</b>              | 20,21                     | -16.71 to 57.13       | No                        | ns          | 0,4143           |    |         |       |
| <b>mTBI:WT vs. mTBI:APP-SWE</b>                   | -0,7990                   | -37.72 to 36.12       | No                        | ns          | >0.9999          |    |         |       |
| <b>Test details</b>                               | Predicted (LS) mean 1     | Predicted (LS) mean 2 | Predicted (LS) mean diff. | SE of diff. | N1               | N2 | q       | DF    |
| <b>Sham:WT vs. Sham:APP-SWE</b>                   | 14,12                     | 35,72                 | -21,60                    | 12,70       | 4                | 5  | 2,405   | 14,00 |
| <b>Sham:WT vs. mTBI:WT</b>                        | 14,12                     | 14,71                 | -0,5885                   | 12,70       | 4                | 5  | 0,06552 | 14,00 |
| <b>Sham:WT vs. mTBI:APP-SWE</b>                   | 14,12                     | 15,51                 | -1,388                    | 13,39       | 4                | 4  | 0,1466  | 14,00 |
| <b>Sham:APP-SWE vs. mTBI:WT</b>                   | 35,72                     | 14,71                 | 21,01                     | 11,98       | 5                | 5  | 2,481   | 14,00 |
| <b>Sham:APP-SWE vs. mTBI:APP-SWE</b>              | 35,72                     | 15,51                 | 20,21                     | 12,70       | 5                | 4  | 2,250   | 14,00 |
| <b>mTBI:WT vs. mTBI:APP-SWE</b>                   | 14,71                     | 15,51                 | -0,7990                   | 12,70       | 5                | 4  | 0,08896 | 14,00 |

2way ANOVA of AEA pmol:g hipp

| Compare cell means regardless of rows and columns |            |                    |                  |             |                  |    |          |       |  |
|---------------------------------------------------|------------|--------------------|------------------|-------------|------------------|----|----------|-------|--|
| Number of families                                | 1          |                    |                  |             |                  |    |          |       |  |
| Number of comparisons per family                  | 6          |                    |                  |             |                  |    |          |       |  |
| Alpha                                             | 0,05       |                    |                  |             |                  |    |          |       |  |
| Tukey's multiple comparisons test                 | Mean Diff. | 95.00% CI of diff. | Below threshold? | Summary     | Adjusted P Value |    |          |       |  |
| Sham:WT vs. Sham:APP-SWE                          | -30,66     | -102.3 to 41.01    | No               | ns          | 0,6213           |    |          |       |  |
| Sham:WT vs. mTBI:WT                               | 22,62      | -49.04 to 94.29    | No               | ns          | 0,8034           |    |          |       |  |
| Sham:WT vs. mTBI:APP-SWE                          | 0,05800    | -71.61 to 71.73    | No               | ns          | >0.9999          |    |          |       |  |
| Sham:APP-SWE vs. mTBI:WT                          | 53,29      | -18.38 to 125.0    | No               | ns          | 0,1866           |    |          |       |  |
| Sham:APP-SWE vs. mTBI:APP-SWE                     | 30,72      | -40.95 to 102.4    | No               | ns          | 0,6199           |    |          |       |  |
| mTBI:WT vs. mTBI:APP-SWE                          | -22,57     | -94.23 to 49.10    | No               | ns          | 0,8045           |    |          |       |  |
| Test details                                      | Mean 1     | Mean 2             | Mean Diff.       | SE of diff. | N1               | N2 | q        | DF    |  |
| Sham:WT vs. Sham:APP-SWE                          | 141,4      | 172,0              | -30,66           | 25,05       | 5                | 5  | 1,731    | 16,00 |  |
| Sham:WT vs. mTBI:WT                               | 141,4      | 118,7              | 22,62            | 25,05       | 5                | 5  | 1,277    | 16,00 |  |
| Sham:WT vs. mTBI:APP-SWE                          | 141,4      | 141,3              | 0,05800          | 25,05       | 5                | 5  | 0,003274 | 16,00 |  |
| Sham:APP-SWE vs. mTBI:WT                          | 172,0      | 118,7              | 53,29            | 25,05       | 5                | 5  | 3,008    | 16,00 |  |
| Sham:APP-SWE vs. mTBI:APP-SWE                     | 172,0      | 141,3              | 30,72            | 25,05       | 5                | 5  | 1,734    | 16,00 |  |
| mTBI:WT vs. mTBI:APP-SWE                          | 118,7      | 141,3              | -22,57           | 25,05       | 5                | 5  | 1,274    | 16,00 |  |

2way ANOVA of 2-AG pmol:mg hipp

| Table Analyzed                         | 2-AG pmol/mg hipp    |         |                                     |         |                     |          |
|----------------------------------------|----------------------|---------|-------------------------------------|---------|---------------------|----------|
| <b>Two-way ANOVA</b>                   | Ordinary             |         |                                     |         |                     |          |
| <b>Alpha</b>                           | 0,05                 |         |                                     |         |                     |          |
| <b>Source of Variation</b>             | % of total variation | P value | P value summary                     |         | Significant?        |          |
| <b>Interaction</b>                     | 2,486                | 0,2096  | ns                                  |         | No                  |          |
| <b>Injury</b>                          | 0,06086              | 0,8405  | ns                                  |         | No                  |          |
| <b>Genotype</b>                        | 74,18                | <0.0001 | ****                                |         | Yes                 |          |
| <b>ANOVA table</b>                     | SS                   | DF      | MS                                  |         | F (DFn, DFd)        | P value  |
| <b>Interaction</b>                     | 0,4322               | 1       |                                     | 0,4322  | F (1, 16) = 1.709   | P=0.2096 |
| <b>Injury</b>                          | 0,01058              | 1       |                                     | 0,01058 | F (1, 16) = 0.04184 | P=0.8405 |
| <b>Genotype</b>                        | 12,90                | 1       |                                     | 12,90   | F (1, 16) = 51.00   | P<0.0001 |
| <b>Residual</b>                        | 4,046                | 16      |                                     | 0,2529  |                     |          |
| <b>Difference between column means</b> |                      |         |                                     |         |                     |          |
| <b>Mean of WT</b>                      | 0,7840               |         |                                     |         |                     |          |
| <b>Mean of APP-SWE</b>                 | 2,390                |         |                                     |         |                     |          |
| <b>Difference between means</b>        | -1,606               |         |                                     |         |                     |          |
| <b>SE of difference</b>                | 0,2249               |         |                                     |         |                     |          |
| <b>95% CI of difference</b>            | -2.083 to -1.129     |         |                                     |         |                     |          |
| <b>Difference between row means</b>    |                      |         |                                     |         |                     |          |
| <b>Mean of Sham</b>                    | 1,564                |         |                                     |         |                     |          |
| <b>Mean of mTBI</b>                    | 1,610                |         |                                     |         |                     |          |
| <b>Difference between means</b>        | -0,04600             |         |                                     |         |                     |          |
| <b>SE of difference</b>                | 0,2249               |         |                                     |         |                     |          |
| <b>95% CI of difference</b>            | -0.5227 to 0.4307    |         |                                     |         |                     |          |
| <b>Interaction CI</b>                  |                      |         |                                     |         |                     |          |
| <b>Mean diff, A1 - B1</b>              | -1,312               |         |                                     |         |                     |          |
| <b>Mean diff, A2 - B2</b>              | -1,900               |         |                                     |         |                     |          |
| <b>(A1 - B1) - (A2 - B2)</b>           | 0,5880               |         |                                     |         |                     |          |
| <b>95% CI of difference</b>            | -0.3655 to 1.541     |         |                                     |         |                     |          |
| <b>(B1 - A1) - (B2 - A2)</b>           | -0,5880              |         |                                     |         |                     |          |
| <b>95% CI of difference</b>            | -1.541 to 0.3655     |         |                                     |         |                     |          |
| <b>Normality of Residuals</b>          |                      |         |                                     |         |                     |          |
| <b>Test name</b>                       | Statistics           | P value | Passed normality test (alpha=0.05)? |         | P value summary     |          |
| <b>D'Agostino-Pearson omnibus (K2)</b> | 1,023                | 0,5996  | Yes                                 |         | ns                  |          |
| <b>Anderson-Darling (A2*)</b>          | 0,1955               | 0,8754  | Yes                                 |         | ns                  |          |
| <b>Shapiro-Wilk (W)</b>                | 0,9736               | 0,8275  | Yes                                 |         | ns                  |          |
| <b>Kolmogorov-Smirnov (distance)</b>   | 0,08118              | 0,1000  | Yes                                 |         | ns                  |          |
| <b>Data summary</b>                    |                      |         |                                     |         |                     |          |
| <b>Number of columns (Genotype)</b>    | 2                    |         |                                     |         |                     |          |
| <b>Number of rows (Injury)</b>         | 2                    |         |                                     |         |                     |          |

|                         |    |  |  |  |
|-------------------------|----|--|--|--|
| <b>Number of values</b> | 20 |  |  |  |
|-------------------------|----|--|--|--|

2way ANOVA of PEA pmol:mg hipp

| Table Analyzed                            | PEA pmol/mg hipp     |         |                                     |                 |                             |
|-------------------------------------------|----------------------|---------|-------------------------------------|-----------------|-----------------------------|
| <b>Two-way ANOVA</b>                      | Ordinary             |         |                                     |                 |                             |
| <b>Alpha</b>                              | 0,05                 |         |                                     |                 |                             |
| <b>Source of Variation</b>                | % of total variation | P value | P value summary                     | Significant?    |                             |
| <b>Interaction</b>                        | 1,210                | 0,5559  | ns                                  | No              |                             |
| <b>Injury</b>                             | 3,706                | 0,3085  | ns                                  | No              |                             |
| <b>Genotype</b>                           | 47,27                | 0,0019  | **                                  | Yes             |                             |
| <b>ANOVA table</b>                        | SS (Type III)        | DF      | MS                                  | F (DFn, DFd)    | P value                     |
| <b>Interaction</b>                        | 0,03012              | 1       |                                     | 0,03012         | F (1, 15) = 0.3628 P=0.5559 |
| <b>Injury</b>                             | 0,09224              | 1       |                                     | 0,09224         | F (1, 15) = 1.111 P=0.3085  |
| <b>Genotype</b>                           | 1,176                | 1       |                                     | 1,176           | F (1, 15) = 14.17 P=0.0019  |
| <b>Residual</b>                           | 1,245                | 15      |                                     | 0,08301         |                             |
| <b>Difference between column means</b>    |                      |         |                                     |                 |                             |
| <b>Predicted (LS) mean of WT</b>          | 0,8100               |         |                                     |                 |                             |
| <b>Predicted (LS) mean of APP-SWE</b>     | 0,3100               |         |                                     |                 |                             |
| <b>Difference between predicted means</b> | 0,5000               |         |                                     |                 |                             |
| <b>SE of difference</b>                   | 0,1328               |         |                                     |                 |                             |
| <b>95% CI of difference</b>               | 0.2169 to 0.7831     |         |                                     |                 |                             |
| <b>Difference between row means</b>       |                      |         |                                     |                 |                             |
| <b>Predicted (LS) mean of Sham</b>        | 0,6300               |         |                                     |                 |                             |
| <b>Predicted (LS) mean of mTBI</b>        | 0,4900               |         |                                     |                 |                             |
| <b>Difference between predicted means</b> | 0,1400               |         |                                     |                 |                             |
| <b>SE of difference</b>                   | 0,1328               |         |                                     |                 |                             |
| <b>95% CI of difference</b>               | -0.1431 to 0.4231    |         |                                     |                 |                             |
| <b>Interaction CI</b>                     |                      |         |                                     |                 |                             |
| <b>Mean diff, A1 - B1</b>                 | 0,5800               |         |                                     |                 |                             |
| <b>Mean diff, A2 - B2</b>                 | 0,4200               |         |                                     |                 |                             |
| <b>(A1 - B1) - (A2 - B2)</b>              | 0,1600               |         |                                     |                 |                             |
| <b>95% CI of difference</b>               | -0.4062 to 0.7262    |         |                                     |                 |                             |
| <b>(B1 - A1) - (B2 - A2)</b>              | -0,1600              |         |                                     |                 |                             |
| <b>95% CI of difference</b>               | -0.7262 to 0.4062    |         |                                     |                 |                             |
| <b>Normality of Residuals</b>             |                      |         |                                     |                 |                             |
| <b>Test name</b>                          | Statistics           | P value | Passed normality test (alpha=0.05)? | P value summary |                             |
| <b>D'Agostino-Pearson omnibus (K2)</b>    | 17,52                | 0,0002  | No                                  | ***             |                             |
| <b>Anderson-Darling (A2*)</b>             | 0,9630               | 0,0118  | No                                  | *               |                             |
| <b>Shapiro-Wilk (W)</b>                   | 0,8426               | 0,0051  | No                                  | **              |                             |
| <b>Kolmogorov-Smirnov (distance)</b>      | 0,2446               | 0,0040  | No                                  | **              |                             |
| <b>Data summary</b>                       |                      |         |                                     |                 |                             |
| <b>Number of columns (Genotype)</b>       | 2                    |         |                                     |                 |                             |
| <b>Number of rows (Injury)</b>            | 2                    |         |                                     |                 |                             |
| <b>Number of values</b>                   | 19                   |         |                                     |                 |                             |

2way ANOVA of OEA pmol:mg hipp

| Compare cell means regardless of rows and columns |            |                    |                  |             |                  |    |        |       |
|---------------------------------------------------|------------|--------------------|------------------|-------------|------------------|----|--------|-------|
| Number of families                                | 1          |                    |                  |             |                  |    |        |       |
| Number of comparisons per family                  | 6          |                    |                  |             |                  |    |        |       |
| Alpha                                             | 0,05       |                    |                  |             |                  |    |        |       |
| Tukey's multiple comparisons test                 | Mean Diff. | 95.00% CI of diff. | Below threshold? | Summary     | Adjusted P Value |    |        |       |
| Sham:WT vs. Sham:APP-SWE                          | -0,3400    | -0.6965 to 0.01650 | No               | ns          | 0,0643           |    |        |       |
| Sham:WT vs. mTBI:WT                               | -0,02800   | -0.3845 to 0.3285  | No               | ns          | 0,9958           |    |        |       |
| Sham:WT vs. mTBI:APP-SWE                          | -0,1200    | -0.4765 to 0.2365  | No               | ns          | 0,7718           |    |        |       |
| Sham:APP-SWE vs. mTBI:WT                          | 0,3120     | -0.04450 to 0.6685 | No               | ns          | 0,0974           |    |        |       |
| Sham:APP-SWE vs. mTBI:APP-SWE                     | 0,2200     | -0.1365 to 0.5765  | No               | ns          | 0,3247           |    |        |       |
| mTBI:WT vs. mTBI:APP-SWE                          | -0,09200   | -0.4485 to 0.2645  | No               | ns          | 0,8802           |    |        |       |
| Test details                                      | Mean 1     | Mean 2             | Mean Diff.       | SE of diff. | N1               | N2 | q      | DF    |
| Sham:WT vs. Sham:APP-SWE                          | 0,4200     | 0,7600             | -0,3400          | 0,1246      | 5                | 5  | 3,859  | 16,00 |
| Sham:WT vs. mTBI:WT                               | 0,4200     | 0,4480             | -0,02800         | 0,1246      | 5                | 5  | 0,3178 | 16,00 |
| Sham:WT vs. mTBI:APP-SWE                          | 0,4200     | 0,5400             | -0,1200          | 0,1246      | 5                | 5  | 1,362  | 16,00 |
| Sham:APP-SWE vs. mTBI:WT                          | 0,7600     | 0,4480             | 0,3120           | 0,1246      | 5                | 5  | 3,541  | 16,00 |
| Sham:APP-SWE vs. mTBI:APP-SWE                     | 0,7600     | 0,5400             | 0,2200           | 0,1246      | 5                | 5  | 2,497  | 16,00 |
| mTBI:WT vs. mTBI:APP-SWE                          | 0,4480     | 0,5400             | -0,09200         | 0,1246      | 5                | 5  | 1,044  | 16,00 |

2way ANOVA of DHEA pmol:mg hipp

| Compare cell means regardless of rows and columns |            |                      |                  |             |                  |    |       |       |  |
|---------------------------------------------------|------------|----------------------|------------------|-------------|------------------|----|-------|-------|--|
| Number of families                                | 1          |                      |                  |             |                  |    |       |       |  |
| Number of comparisons per family                  | 6          |                      |                  |             |                  |    |       |       |  |
| Alpha                                             | 0,05       |                      |                  |             |                  |    |       |       |  |
| Tukey's multiple comparisons test                 | Mean Diff. | 95.00% CI of diff.   | Below threshold? | Summary     | Adjusted P Value |    |       |       |  |
| Sham:WT vs. Sham:APP-SWE                          | -0,2984    | -0.5937 to -0.003057 | Yes              | *           | 0,0472           |    |       |       |  |
| Sham:WT vs. mTBI:WT                               | 0,07800    | -0.2173 to 0.3733    | No               | ns          | 0,8729           |    |       |       |  |
| Sham:WT vs. mTBI:APP-SWE                          | -0,07492   | -0.3702 to 0.2204    | No               | ns          | 0,8854           |    |       |       |  |
| Sham:APP-SWE vs. mTBI:WT                          | 0,3764     | 0.08106 to 0.6717    | Yes              | *           | 0,0105           |    |       |       |  |
| Sham:APP-SWE vs. mTBI:APP-SWE                     | 0,2235     | -0.07186 to 0.5188   | No               | ns          | 0,1754           |    |       |       |  |
| mTBI:WT vs. mTBI:APP-SWE                          | -0,1529    | -0.4482 to 0.1424    | No               | ns          | 0,4706           |    |       |       |  |
| Test details                                      | Mean 1     | Mean 2               | Mean Diff.       | SE of diff. | N1               | N2 | q     | DF    |  |
| Sham:WT vs. Sham:APP-SWE                          | 0,3640     | 0,6624               | -0,2984          | 0,1032      | 5                | 5  | 4,088 | 16,00 |  |
| Sham:WT vs. mTBI:WT                               | 0,3640     | 0,2860               | 0,07800          | 0,1032      | 5                | 5  | 1,069 | 16,00 |  |
| Sham:WT vs. mTBI:APP-SWE                          | 0,3640     | 0,4389               | -0,07492         | 0,1032      | 5                | 5  | 1,026 | 16,00 |  |
| Sham:APP-SWE vs. mTBI:WT                          | 0,6624     | 0,2860               | 0,3764           | 0,1032      | 5                | 5  | 5,157 | 16,00 |  |
| Sham:APP-SWE vs. mTBI:APP-SWE                     | 0,6624     | 0,4389               | 0,2235           | 0,1032      | 5                | 5  | 3,062 | 16,00 |  |
| mTBI:WT vs. mTBI:APP-SWE                          | 0,2860     | 0,4389               | -0,1529          | 0,1032      | 5                | 5  | 2,095 | 16,00 |  |

2way ANOVA of EPEA pmol:mg hipp

| Compare cell means regardless of rows and columns |            |                      |                  |             |                  |    |        |       |
|---------------------------------------------------|------------|----------------------|------------------|-------------|------------------|----|--------|-------|
| <b>Number of families</b>                         | 1          |                      |                  |             |                  |    |        |       |
| <b>Number of comparisons per family</b>           | 6          |                      |                  |             |                  |    |        |       |
| <b>Alpha</b>                                      | 0,05       |                      |                  |             |                  |    |        |       |
| <b>Tukey's multiple comparisons test</b>          | Mean Diff. | 95.00% CI of diff.   | Below threshold? | Summary     | Adjusted P Value |    |        |       |
| <b>Sham:WT vs. Sham:APP-SWE</b>                   | -0,001461  | -0.01513 to 0.01221  | No               | ns          | 0,9897           |    |        |       |
| <b>Sham:WT vs. mTBI:WT</b>                        | 0,006000   | -0.007672 to 0.01967 | No               | ns          | 0,6024           |    |        |       |
| <b>Sham:WT vs. mTBI:APP-SWE</b>                   | 0,002738   | -0.01093 to 0.01641  | No               | ns          | 0,9387           |    |        |       |
| <b>Sham:APP-SWE vs. mTBI:WT</b>                   | 0,007461   | -0.006211 to 0.02113 | No               | ns          | 0,4268           |    |        |       |
| <b>Sham:APP-SWE vs. mTBI:APP-SWE</b>              | 0,004199   | -0.009473 to 0.01787 | No               | ns          | 0,8158           |    |        |       |
| <b>mTBI:WT vs. mTBI:APP-SWE</b>                   | -0,003262  | -0.01693 to 0.01041  | No               | ns          | 0,9022           |    |        |       |
| <b>Test details</b>                               | Mean 1     | Mean 2               | Mean Diff.       | SE of diff. | N1               | N2 | q      | DF    |
| <b>Sham:WT vs. Sham:APP-SWE</b>                   | 0,02000    | 0,02146              | -0,001461        | 0,004779    | 5                | 5  | 0,4323 | 16,00 |
| <b>Sham:WT vs. mTBI:WT</b>                        | 0,02000    | 0,01400              | 0,006000         | 0,004779    | 5                | 5  | 1,776  | 16,00 |
| <b>Sham:WT vs. mTBI:APP-SWE</b>                   | 0,02000    | 0,01726              | 0,002738         | 0,004779    | 5                | 5  | 0,8103 | 16,00 |
| <b>Sham:APP-SWE vs. mTBI:WT</b>                   | 0,02146    | 0,01400              | 0,007461         | 0,004779    | 5                | 5  | 2,208  | 16,00 |
| <b>Sham:APP-SWE vs. mTBI:APP-SWE</b>              | 0,02146    | 0,01726              | 0,004199         | 0,004779    | 5                | 5  | 1,243  | 16,00 |
| <b>mTBI:WT vs. mTBI:APP-SWE</b>                   | 0,01400    | 0,01726              | -0,003262        | 0,004779    | 5                | 5  | 0,9654 | 16,00 |

2way ANOVA of 2-DHG pmol:mg hipp

| Compare cell means regardless of rows and columns |                           |                       |                           |             |                  |    |        |       |
|---------------------------------------------------|---------------------------|-----------------------|---------------------------|-------------|------------------|----|--------|-------|
| <b>Number of families</b>                         | 1                         |                       |                           |             |                  |    |        |       |
| <b>Number of comparisons per family</b>           | 6                         |                       |                           |             |                  |    |        |       |
| <b>Alpha</b>                                      | 0,05                      |                       |                           |             |                  |    |        |       |
| <b>Tukey's multiple comparisons test</b>          | Predicted (LS) mean diff. | 95.00% CI of diff.    | Below threshold?          | Summary     | Adjusted P Value |    |        |       |
| <b>Sham:WT vs. Sham:APP-SWE</b>                   | -14,42                    | -38.98 to 10.15       | No                        | ns          | 0,3518           |    |        |       |
| <b>Sham:WT vs. mTBI:WT</b>                        | 19,33                     | -5.236 to 43.89       | No                        | ns          | 0,1463           |    |        |       |
| <b>Sham:WT vs. mTBI:APP-SWE</b>                   | -5,222                    | -33.19 to 22.75       | No                        | ns          | 0,9455           |    |        |       |
| <b>Sham:APP-SWE vs. mTBI:WT</b>                   | 33,74                     | 10.58 to 56.90        | Yes                       | **          | 0,0044           |    |        |       |
| <b>Sham:APP-SWE vs. mTBI:APP-SWE</b>              | 9,193                     | -17.55 to 35.94       | No                        | ns          | 0,7471           |    |        |       |
| <b>mTBI:WT vs. mTBI:APP-SWE</b>                   | -24,55                    | -51.29 to 2.193       | No                        | ns          | 0,0764           |    |        |       |
| <b>Test details</b>                               | Predicted (LS) mean 1     | Predicted (LS) mean 2 | Predicted (LS) mean diff. | SE of diff. | N1               | N2 | q      | DF    |
| <b>Sham:WT vs. Sham:APP-SWE</b>                   | 39,95                     | 54,36                 | -14,42                    | 8,370       | 4                | 5  | 2,436  | 13,00 |
| <b>Sham:WT vs. mTBI:WT</b>                        | 39,95                     | 20,62                 | 19,33                     | 8,370       | 4                | 5  | 3,266  | 13,00 |
| <b>Sham:WT vs. mTBI:APP-SWE</b>                   | 39,95                     | 45,17                 | -5,222                    | 9,529       | 4                | 3  | 0,7749 | 13,00 |
| <b>Sham:APP-SWE vs. mTBI:WT</b>                   | 54,36                     | 20,62                 | 33,74                     | 7,891       | 5                | 5  | 6,048  | 13,00 |
| <b>Sham:APP-SWE vs. mTBI:APP-SWE</b>              | 54,36                     | 45,17                 | 9,193                     | 9,112       | 5                | 3  | 1,427  | 13,00 |
| <b>mTBI:WT vs. mTBI:APP-SWE</b>                   | 20,62                     | 45,17                 | -24,55                    | 9,112       | 5                | 3  | 3,811  | 13,00 |

2way ANOVA of OIGly pmol:mg hipp

| Table Analyzed                         | OIGly pmol/mg hipp   |         |                                     |                     |          |
|----------------------------------------|----------------------|---------|-------------------------------------|---------------------|----------|
| <b>Two-way ANOVA</b>                   | Ordinary             |         |                                     |                     |          |
| Alpha                                  | 0,05                 |         |                                     |                     |          |
| <b>Source of Variation</b>             | % of total variation | P value | P value summary                     | Significant?        |          |
| Interaction                            | 21,49                | 0,0236  | *                                   | Yes                 |          |
| Injury                                 | 0,09831              | 0,8661  | ns                                  | No                  |          |
| Genotype                               | 31,80                | 0,0080  | **                                  | Yes                 |          |
| <b>ANOVA table</b>                     | SS (Type III)        | DF      | MS                                  | F (DFn, DFd)        | P value  |
| Interaction                            | 6,413                | 1       | 6,413                               | F (1, 14) = 6.447   | P=0.0236 |
| Injury                                 | 0,02934              | 1       | 0,02934                             | F (1, 14) = 0.02949 | P=0.8661 |
| Genotype                               | 9,490                | 1       | 9,490                               | F (1, 14) = 9.539   | P=0.0080 |
| Residual                               | 13,93                | 14      | 0,9948                              |                     |          |
| <b>Difference between column means</b> |                      |         |                                     |                     |          |
| Predicted (LS) mean of WT              | 1,859                |         |                                     |                     |          |
| Predicted (LS) mean of APP-SWE         | 3,320                |         |                                     |                     |          |
| Difference between predicted means     | -1,461               |         |                                     |                     |          |
| SE of difference                       | 0,4731               |         |                                     |                     |          |
| 95% CI of difference                   | -2.476 to -0.4465    |         |                                     |                     |          |
| <b>Difference between row means</b>    |                      |         |                                     |                     |          |
| Predicted (LS) mean of Sham            | 2,630                |         |                                     |                     |          |
| Predicted (LS) mean of mTBI            | 2,549                |         |                                     |                     |          |
| Difference between predicted means     | 0,08125              |         |                                     |                     |          |
| SE of difference                       | 0,4731               |         |                                     |                     |          |
| 95% CI of difference                   | -0.9335 to 1.096     |         |                                     |                     |          |
| <b>Interaction CI</b>                  |                      |         |                                     |                     |          |
| Mean diff, A1 - B1                     | -0,2600              |         |                                     |                     |          |
| Mean diff, A2 - B2                     | -2,663               |         |                                     |                     |          |
| (A1 - B1) - (A2 - B2)                  | 2,403                |         |                                     |                     |          |
| 95% CI of difference                   | 0.3730 to 4.432      |         |                                     |                     |          |
| (B1 - A1) - (B2 - A2)                  | -2,403               |         |                                     |                     |          |
| 95% CI of difference                   | -4.432 to -0.3730    |         |                                     |                     |          |
| <b>Normality of Residuals</b>          |                      |         |                                     |                     |          |
| Test name                              | Statistics           | P value | Passed normality test (alpha=0.05)? | P value summary     |          |
| D'Agostino-Pearson omnibus (K2)        | 0,3562               | 0,8369  | Yes                                 | ns                  |          |
| Anderson-Darling (A2*)                 | 0,1425               | 0,9638  | Yes                                 | ns                  |          |
| Shapiro-Wilk (W)                       | 0,9819               | 0,9675  | Yes                                 | ns                  |          |
| Kolmogorov-Smirnov (distance)          | 0,09085              | 0,1000  | Yes                                 | ns                  |          |
| <b>Data summary</b>                    |                      |         |                                     |                     |          |
| Number of columns (Genotype)           | 2                    |         |                                     |                     |          |
| Number of rows (Injury)                | 2                    |         |                                     |                     |          |
| Number of values                       | 18                   |         |                                     |                     |          |

2way ANOVA of OA5HT pmol:mg hipp

| Table Analyzed                         | OA5HT pmol/mg hipp   |         |                                     |                    |          |
|----------------------------------------|----------------------|---------|-------------------------------------|--------------------|----------|
| <b>Two-way ANOVA</b>                   | Ordinary             |         |                                     |                    |          |
| Alpha                                  | 0,05                 |         |                                     |                    |          |
| <b>Source of Variation</b>             | % of total variation | P value | P value summary                     | Significant?       |          |
| Interaction                            | 37,54                | 0,0065  | **                                  | Yes                |          |
| Injury                                 | 2,450                | 0,4280  | ns                                  | No                 |          |
| Genotype                               | 7,535                | 0,1742  | ns                                  | No                 |          |
| <b>ANOVA table</b>                     | SS (Type III)        | DF      | MS                                  | F (DFn, DFd)       | P value  |
| Interaction                            | 11,49                | 1       | 11,49                               | F (1, 14) = 10.21  | P=0.0065 |
| Injury                                 | 0,7500               | 1       | 0,7500                              | F (1, 14) = 0.6663 | P=0.4280 |
| Genotype                               | 2,307                | 1       | 2,307                               | F (1, 14) = 2.049  | P=0.1742 |
| Residual                               | 15,76                | 14      | 1,126                               |                    |          |
| <b>Difference between column means</b> |                      |         |                                     |                    |          |
| Predicted (LS) mean of WT              | 0,9063               |         |                                     |                    |          |
| Predicted (LS) mean of APP-SWE         | 1,640                |         |                                     |                    |          |
| Difference between predicted means     | -0,7337              |         |                                     |                    |          |
| SE of difference                       | 0,5125               |         |                                     |                    |          |
| 95% CI of difference                   | -1.833 to 0.3655     |         |                                     |                    |          |
| <b>Difference between row means</b>    |                      |         |                                     |                    |          |
| Predicted (LS) mean of Sham            | 1,064                |         |                                     |                    |          |
| Predicted (LS) mean of mTBI            | 1,482                |         |                                     |                    |          |
| Difference between predicted means     | -0,4183              |         |                                     |                    |          |
| SE of difference                       | 0,5125               |         |                                     |                    |          |
| 95% CI of difference                   | -1.518 to 0.6809     |         |                                     |                    |          |
| <b>Interaction CI</b>                  |                      |         |                                     |                    |          |
| Mean diff, A1 - B1                     | 0,9040               |         |                                     |                    |          |
| Mean diff, A2 - B2                     | -2,371               |         |                                     |                    |          |
| (A1 - B1) - (A2 - B2)                  | 3,275                |         |                                     |                    |          |
| 95% CI of difference                   | 1.077 to 5.474       |         |                                     |                    |          |
| (B1 - A1) - (B2 - A2)                  | -3,275               |         |                                     |                    |          |
| 95% CI of difference                   | -5.474 to -1.077     |         |                                     |                    |          |
| <b>Normality of Residuals</b>          |                      |         |                                     |                    |          |
| Test name                              | Statistics           | P value | Passed normality test (alpha=0.05)? | P value summary    |          |
| D'Agostino-Pearson omnibus (K2)        | 1,469                | 0,4798  | Yes                                 | ns                 |          |
| Anderson-Darling (A2*)                 | 0,4308               | 0,2734  | Yes                                 | ns                 |          |
| Shapiro-Wilk (W)                       | 0,9332               | 0,2212  | Yes                                 | ns                 |          |
| Kolmogorov-Smirnov (distance)          | 0,1795               | 0,1000  | Yes                                 | ns                 |          |
| <b>Data summary</b>                    |                      |         |                                     |                    |          |
| Number of columns (Genotype)           | 2                    |         |                                     |                    |          |
| Number of rows (Injury)                | 2                    |         |                                     |                    |          |
| Number of values                       | 18                   |         |                                     |                    |          |

2way ANOVA of DHA5HT pmol:mg hipp

| Compare cell means regardless of rows and columns |                           |                       |                           |             |                  |    |       |       |
|---------------------------------------------------|---------------------------|-----------------------|---------------------------|-------------|------------------|----|-------|-------|
| <b>Number of families</b>                         | 1                         |                       |                           |             |                  |    |       |       |
| <b>Number of comparisons per family</b>           | 6                         |                       |                           |             |                  |    |       |       |
| <b>Alpha</b>                                      | 0,05                      |                       |                           |             |                  |    |       |       |
| <b>Tukey's multiple comparisons test</b>          | Predicted (LS) mean diff. | 95.00% CI of diff.    | Below threshold?          | Summary     | Adjusted P Value |    |       |       |
| <b>Sham:WT vs. Sham:APP-SWE</b>                   | -0,5725                   | -2.177 to 1.032       | No                        | ns          | 0,7256           |    |       |       |
| <b>Sham:WT vs. mTBI:WT</b>                        | 0,7275                    | -1.099 to 2.554       | No                        | ns          | 0,6556           |    |       |       |
| <b>Sham:WT vs. mTBI:APP-SWE</b>                   | -0,9905                   | -2.595 to 0.6136      | No                        | ns          | 0,3112           |    |       |       |
| <b>Sham:APP-SWE vs. mTBI:WT</b>                   | 1,300                     | -0.4463 to 3.046      | No                        | ns          | 0,1787           |    |       |       |
| <b>Sham:APP-SWE vs. mTBI:APP-SWE</b>              | -0,4180                   | -1.930 to 1.094       | No                        | ns          | 0,8481           |    |       |       |
| <b>mTBI:WT vs. mTBI:APP-SWE</b>                   | -1,718                    | -3.464 to 0.02829     | No                        | ns          | 0,0544           |    |       |       |
| <b>Test details</b>                               | Predicted (LS) mean 1     | Predicted (LS) mean 2 | Predicted (LS) mean diff. | SE of diff. | N1               | N2 | q     | DF    |
| <b>Sham:WT vs. Sham:APP-SWE</b>                   | 1,498                     | 2,070                 | -0,5725                   | 0,5465      | 4                | 5  | 1,481 | 13,00 |
| <b>Sham:WT vs. mTBI:WT</b>                        | 1,498                     | 0,7700                | 0,7275                    | 0,6222      | 4                | 3  | 1,653 | 13,00 |
| <b>Sham:WT vs. mTBI:APP-SWE</b>                   | 1,498                     | 2,488                 | -0,9905                   | 0,5465      | 4                | 5  | 2,563 | 13,00 |
| <b>Sham:APP-SWE vs. mTBI:WT</b>                   | 2,070                     | 0,7700                | 1,300                     | 0,5950      | 5                | 3  | 3,090 | 13,00 |
| <b>Sham:APP-SWE vs. mTBI:APP-SWE</b>              | 2,070                     | 2,488                 | -0,4180                   | 0,5153      | 5                | 5  | 1,147 | 13,00 |
| <b>mTBI:WT vs. mTBI:APP-SWE</b>                   | 0,7700                    | 2,488                 | -1,718                    | 0,5950      | 3                | 5  | 4,084 | 13,00 |

2way ANOVA of EPA5HT pmol:mg hipp

| Table Analyzed                         | EPA5HT pmol/mg hipp  |         |                                     |                 |                   |
|----------------------------------------|----------------------|---------|-------------------------------------|-----------------|-------------------|
| <b>Two-way ANOVA</b>                   | Ordinary             |         |                                     |                 |                   |
| Alpha                                  | 0,05                 |         |                                     |                 |                   |
| <b>Source of Variation</b>             | % of total variation | P value | P value summary                     | Significant?    |                   |
| Interaction                            | 26,17                | 0,0072  | **                                  | Yes             |                   |
| Injury                                 | 18,39                | 0,0196  | *                                   | Yes             |                   |
| Genotype                               | 22,73                | 0,0110  | *                                   | Yes             |                   |
| <b>ANOVA table</b>                     | SS (Type III)        | DF      | MS                                  | F (DFn, DFd)    | P value           |
| Interaction                            | 211,2                | 1       |                                     | 211,2           | F (1, 14) = 9.879 |
| Injury                                 | 148,4                | 1       |                                     | 148,4           | F (1, 14) = 6.944 |
| Genotype                               | 183,5                | 1       |                                     | 183,5           | F (1, 14) = 8.581 |
| Residual                               | 299,3                | 14      |                                     | 21,38           |                   |
| <b>Difference between column means</b> |                      |         |                                     |                 |                   |
| Predicted (LS) mean of WT              | 12,39                |         |                                     |                 |                   |
| Predicted (LS) mean of APP-SWE         | 5,969                |         |                                     |                 |                   |
| Difference between predicted means     | 6,425                |         |                                     |                 |                   |
| SE of difference                       | 2,193                |         |                                     |                 |                   |
| 95% CI of difference                   | 1.721 to 11.13       |         |                                     |                 |                   |
| <b>Difference between row means</b>    |                      |         |                                     |                 |                   |
| Predicted (LS) mean of Sham            | 12,07                |         |                                     |                 |                   |
| Predicted (LS) mean of mTBI            | 6,292                |         |                                     |                 |                   |
| Difference between predicted means     | 5,779                |         |                                     |                 |                   |
| SE of difference                       | 2,193                |         |                                     |                 |                   |
| 95% CI of difference                   | 1.075 to 10.48       |         |                                     |                 |                   |
| <b>Interaction CI</b>                  |                      |         |                                     |                 |                   |
| Mean diff, A1 - B1                     | 13,32                |         |                                     |                 |                   |
| Mean diff, A2 - B2                     | -0,4685              |         |                                     |                 |                   |
| (A1 - B1) - (A2 - B2)                  | 13,79                |         |                                     |                 |                   |
| 95% CI of difference                   | 4.379 to 23.19       |         |                                     |                 |                   |
| (B1 - A1) - (B2 - A2)                  | -13,79               |         |                                     |                 |                   |
| 95% CI of difference                   | -23.19 to -4.379     |         |                                     |                 |                   |
| <b>Normality of Residuals</b>          |                      |         |                                     |                 |                   |
| Test name                              | Statistics           | P value | Passed normality test (alpha=0.05)? | P value summary |                   |
| D'Agostino-Pearson omnibus (K2)        | 2,396                | 0,3018  | Yes                                 | ns              |                   |
| Anderson-Darling (A2*)                 | 0,3726               | 0,3811  | Yes                                 | ns              |                   |
| Shapiro-Wilk (W)                       | 0,9436               | 0,3331  | Yes                                 | ns              |                   |
| Kolmogorov-Smirnov (distance)          | 0,1436               | 0,1000  | Yes                                 | ns              |                   |
| <b>Data summary</b>                    |                      |         |                                     |                 |                   |
| Number of columns (Genotype)           | 2                    |         |                                     |                 |                   |
| Number of rows (Injury)                | 2                    |         |                                     |                 |                   |
| Number of values                       | 18                   |         |                                     |                 |                   |

2way ANOVA of PA5HT pmol:mg hipp

| Table Analyzed                         | PA5HT pmol/mg hipp   |         |                                     |                 |                            |
|----------------------------------------|----------------------|---------|-------------------------------------|-----------------|----------------------------|
| <b>Two-way ANOVA</b>                   | Ordinary             |         |                                     |                 |                            |
| Alpha                                  | 0,05                 |         |                                     |                 |                            |
| <b>Source of Variation</b>             | % of total variation | P value | P value summary                     | Significant?    |                            |
| Interaction                            | 3,317                | 0,2164  | ns                                  | No              |                            |
| Injury                                 | 58,07                | 0,0001  | ***                                 | Yes             |                            |
| Genotype                               | 11,95                | 0,0283  | *                                   | Yes             |                            |
| <b>ANOVA table</b>                     | SS (Type III)        | DF      | MS                                  | F (DFn, DFd)    | P value                    |
| Interaction                            | 341,4                | 1       |                                     | 341,4           | F (1, 13) = 1.688 P=0.2164 |
| Injury                                 | 5977                 | 1       |                                     | 5977            | F (1, 13) = 29.56 P=0.0001 |
| Genotype                               | 1231                 | 1       |                                     | 1231            | F (1, 13) = 6.085 P=0.0283 |
| Residual                               | 2629                 | 13      |                                     | 202,2           |                            |
| <b>Difference between column means</b> |                      |         |                                     |                 |                            |
| Predicted (LS) mean of WT              | 69,20                |         |                                     |                 |                            |
| Predicted (LS) mean of APP-SWE         | 52,11                |         |                                     |                 |                            |
| Difference between predicted means     | 17,10                |         |                                     |                 |                            |
| SE of difference                       | 6,930                |         |                                     |                 |                            |
| 95% CI of difference                   | 2.123 to 32.07       |         |                                     |                 |                            |
| <b>Difference between row means</b>    |                      |         |                                     |                 |                            |
| Predicted (LS) mean of Sham            | 79,50                |         |                                     |                 |                            |
| Predicted (LS) mean of mTBI            | 41,82                |         |                                     |                 |                            |
| Difference between predicted means     | 37,68                |         |                                     |                 |                            |
| SE of difference                       | 6,930                |         |                                     |                 |                            |
| 95% CI of difference                   | 22.71 to 52.65       |         |                                     |                 |                            |
| <b>Interaction CI</b>                  |                      |         |                                     |                 |                            |
| Mean diff, A1 - B1                     | 26,10                |         |                                     |                 |                            |
| Mean diff, A2 - B2                     | 8,091                |         |                                     |                 |                            |
| (A1 - B1) - (A2 - B2)                  | 18,01                |         |                                     |                 |                            |
| 95% CI of difference                   | -11.94 to 47.95      |         |                                     |                 |                            |
| (B1 - A1) - (B2 - A2)                  | -18,01               |         |                                     |                 |                            |
| 95% CI of difference                   | -47.95 to 11.94      |         |                                     |                 |                            |
| <b>Normality of Residuals</b>          |                      |         |                                     |                 |                            |
| Test name                              | Statistics           | P value | Passed normality test (alpha=0.05)? | P value summary |                            |
| D'Agostino-Pearson omnibus (K2)        | 0,5143               | 0,7732  | Yes                                 | ns              |                            |
| Anderson-Darling (A2*)                 | 0,2014               | 0,8566  | Yes                                 | ns              |                            |
| Shapiro-Wilk (W)                       | 0,9778               | 0,9346  | Yes                                 | ns              |                            |
| Kolmogorov-Smirnov (distance)          | 0,1161               | 0,1000  | Yes                                 | ns              |                            |
| <b>Data summary</b>                    |                      |         |                                     |                 |                            |
| Number of columns (Genotype)           | 2                    |         |                                     |                 |                            |
| Number of rows (Injury)                | 2                    |         |                                     |                 |                            |
| Number of values                       | 17                   |         |                                     |                 |                            |

2way ANOVA of Napepld cortex

| Table Analyzed                         | Napepld cortex       |         |                                     |                    |          |
|----------------------------------------|----------------------|---------|-------------------------------------|--------------------|----------|
| <b>Two-way ANOVA</b>                   | Ordinary             |         |                                     |                    |          |
| Alpha                                  | 0,05                 |         |                                     |                    |          |
| <b>Source of Variation</b>             | % of total variation | P value | P value summary                     | Significant?       |          |
| Interaction                            | 49,74                | 0,0005  | ***                                 | Yes                |          |
| Injury                                 | 1,368                | 0,4840  | ns                                  | No                 |          |
| Genotype                               | 0,6904               | 0,6177  | ns                                  | No                 |          |
| <b>ANOVA table</b>                     | SS (Type III)        | DF      | MS                                  | F (DFn, DFd)       | P value  |
| Interaction                            | 2,526                | 1       | 2,526                               | F (1, 16) = 18.67  | P=0.0005 |
| Injury                                 | 0,06945              | 1       | 0,06945                             | F (1, 16) = 0.5133 | P=0.4840 |
| Genotype                               | 0,03506              | 1       | 0,03506                             | F (1, 16) = 0.2591 | P=0.6177 |
| Residual                               | 2,165                | 16      | 0,1353                              |                    |          |
| <b>Difference between column means</b> |                      |         |                                     |                    |          |
| Predicted (LS) mean of WT              | 0,5771               |         |                                     |                    |          |
| Predicted (LS) mean of APP-SWE         | 0,6626               |         |                                     |                    |          |
| Difference between predicted means     | -0,08546             |         |                                     |                    |          |
| SE of difference                       | 0,1679               |         |                                     |                    |          |
| 95% CI of difference                   | -0.4414 to 0.2705    |         |                                     |                    |          |
| <b>Difference between row means</b>    |                      |         |                                     |                    |          |
| Predicted (LS) mean of Sham            | 0,6800               |         |                                     |                    |          |
| Predicted (LS) mean of mTBI            | 0,5597               |         |                                     |                    |          |
| Difference between predicted means     | 0,1203               |         |                                     |                    |          |
| SE of difference                       | 0,1679               |         |                                     |                    |          |
| 95% CI of difference                   | -0.2356 to 0.4762    |         |                                     |                    |          |
| <b>Interaction CI</b>                  |                      |         |                                     |                    |          |
| Mean diff, A1 - B1                     | 0,6400               |         |                                     |                    |          |
| Mean diff, A2 - B2                     | -0,8109              |         |                                     |                    |          |
| (A1 - B1) - (A2 - B2)                  | 1,451                |         |                                     |                    |          |
| 95% CI of difference                   | 0.7390 to 2.163      |         |                                     |                    |          |
| (B1 - A1) - (B2 - A2)                  | -1,451               |         |                                     |                    |          |
| 95% CI of difference                   | -2.163 to -0.7390    |         |                                     |                    |          |
| <b>Normality of Residuals</b>          |                      |         |                                     |                    |          |
| Test name                              | Statistics           | P value | Passed normality test (alpha=0.05)? | P value summary    |          |
| D'Agostino-Pearson omnibus (K2)        | 4,212                | 0,1217  | Yes                                 | ns                 |          |
| Anderson-Darling (A2*)                 | 1,024                | 0,0084  | No                                  | **                 |          |
| Shapiro-Wilk (W)                       | 0,8864               | 0,0231  | No                                  | *                  |          |
| Kolmogorov-Smirnov (distance)          | 0,1895               | 0,0579  | Yes                                 | ns                 |          |
| <b>Data summary</b>                    |                      |         |                                     |                    |          |
| Number of columns (Genotype)           | 2                    |         |                                     |                    |          |
| Number of rows (Injury)                | 2                    |         |                                     |                    |          |

|                         |    |  |  |  |
|-------------------------|----|--|--|--|
| <b>Number of values</b> | 20 |  |  |  |
|-------------------------|----|--|--|--|

2way ANOVA of Gde1 cortex

| Table Analyzed                         | Gde1 cortex          |         |                                     |                   |          |
|----------------------------------------|----------------------|---------|-------------------------------------|-------------------|----------|
| <b>Two-way ANOVA</b>                   | Ordinary             |         |                                     |                   |          |
| Alpha                                  | 0,05                 |         |                                     |                   |          |
| <b>Source of Variation</b>             | % of total variation | P value | P value summary                     | Significant?      |          |
| Interaction                            | 35,19                | <0.0001 | ****                                | Yes               |          |
| Injury                                 | 27,25                | <0.0001 | ****                                | Yes               |          |
| Genotype                               | 43,36                | <0.0001 | ****                                | Yes               |          |
| <b>ANOVA table</b>                     | SS (Type III)        | DF      | MS                                  | F (DFn, DFd)      | P value  |
| Interaction                            | 24,81                | 1       | 24,81                               | F (1, 16) = 125.2 | P<0.0001 |
| Injury                                 | 19,21                | 1       | 19,21                               | F (1, 16) = 96.94 | P<0.0001 |
| Genotype                               | 30,57                | 1       | 30,57                               | F (1, 16) = 154.2 | P<0.0001 |
| Residual                               | 3,171                | 16      | 0,1982                              |                   |          |
| <b>Difference between column means</b> |                      |         |                                     |                   |          |
| Predicted (LS) mean of WT              | 0,8636               |         |                                     |                   |          |
| Predicted (LS) mean of APP-SWE         | 3,387                |         |                                     |                   |          |
| Difference between predicted means     | -2,524               |         |                                     |                   |          |
| SE of difference                       | 0,2032               |         |                                     |                   |          |
| 95% CI of difference                   | -2.954 to -2.093     |         |                                     |                   |          |
| <b>Difference between row means</b>    |                      |         |                                     |                   |          |
| Predicted (LS) mean of Sham            | 1,125                |         |                                     |                   |          |
| Predicted (LS) mean of mTBI            | 3,126                |         |                                     |                   |          |
| Difference between predicted means     | -2,001               |         |                                     |                   |          |
| SE of difference                       | 0,2032               |         |                                     |                   |          |
| 95% CI of difference                   | -2.432 to -1.570     |         |                                     |                   |          |
| <b>Interaction CI</b>                  |                      |         |                                     |                   |          |
| Mean diff, A1 - B1                     | -0,2502              |         |                                     |                   |          |
| Mean diff, A2 - B2                     | -4,797               |         |                                     |                   |          |
| (A1 - B1) - (A2 - B2)                  | 4,547                |         |                                     |                   |          |
| 95% CI of difference                   | 3.685 to 5.409       |         |                                     |                   |          |
| (B1 - A1) - (B2 - A2)                  | -4,547               |         |                                     |                   |          |
| 95% CI of difference                   | -5.409 to -3.685     |         |                                     |                   |          |
| <b>Normality of Residuals</b>          |                      |         |                                     |                   |          |
| Test name                              | Statistics           | P value | Passed normality test (alpha=0.05)? | P value summary   |          |
| D'Agostino-Pearson omnibus (K2)        | 1,533                | 0,4645  | Yes                                 | ns                |          |
| Anderson-Darling (A2*)                 | 0,4298               | 0,2786  | Yes                                 | ns                |          |
| Shapiro-Wilk (W)                       | 0,9350               | 0,1928  | Yes                                 | ns                |          |
| Kolmogorov-Smirnov (distance)          | 0,1782               | 0,0959  | Yes                                 | ns                |          |
| <b>Data summary</b>                    |                      |         |                                     |                   |          |
| Number of columns (Genotype)           | 2                    |         |                                     |                   |          |
| Number of rows (Injury)                | 2                    |         |                                     |                   |          |

|                         |    |  |  |  |
|-------------------------|----|--|--|--|
| <b>Number of values</b> | 20 |  |  |  |
|-------------------------|----|--|--|--|

2way ANOVA of Faah cortex

| Table Analyzed                         | Faah cortex          |         |                                     |                 |                             |
|----------------------------------------|----------------------|---------|-------------------------------------|-----------------|-----------------------------|
| <b>Two-way ANOVA</b>                   | Ordinary             |         |                                     |                 |                             |
| Alpha                                  | 0,05                 |         |                                     |                 |                             |
| <b>Source of Variation</b>             | % of total variation | P value | P value summary                     | Significant?    |                             |
| Interaction                            | 12,25                | 0,1362  | ns                                  | No              |                             |
| Injury                                 | 8,710                | 0,2045  | ns                                  | No              |                             |
| Genotype                               | 2,832                | 0,4616  | ns                                  | No              |                             |
| <b>ANOVA table</b>                     | SS (Type III)        | DF      | MS                                  | F (DFn, DFd)    | P value                     |
| Interaction                            | 0,4663               | 1       |                                     | 0,4663          | F (1, 16) = 2.462 P=0.1362  |
| Injury                                 | 0,3315               | 1       |                                     | 0,3315          | F (1, 16) = 1.750 P=0.2045  |
| Genotype                               | 0,1078               | 1       |                                     | 0,1078          | F (1, 16) = 0.5691 P=0.4616 |
| Residual                               | 3,031                | 16      |                                     | 0,1894          |                             |
| <b>Difference between column means</b> |                      |         |                                     |                 |                             |
| Predicted (LS) mean of WT              | 0,9756               |         |                                     |                 |                             |
| Predicted (LS) mean of APP-SWE         | 0,8257               |         |                                     |                 |                             |
| Difference between predicted means     | 0,1499               |         |                                     |                 |                             |
| SE of difference                       | 0,1987               |         |                                     |                 |                             |
| 95% CI of difference                   | -0.2713 to 0.5710    |         |                                     |                 |                             |
| <b>Difference between row means</b>    |                      |         |                                     |                 |                             |
| Predicted (LS) mean of Sham            | 0,7692               |         |                                     |                 |                             |
| Predicted (LS) mean of mTBI            | 1,032                |         |                                     |                 |                             |
| Difference between predicted means     | -0,2628              |         |                                     |                 |                             |
| SE of difference                       | 0,1987               |         |                                     |                 |                             |
| 95% CI of difference                   | -0.6839 to 0.1583    |         |                                     |                 |                             |
| <b>Interaction CI</b>                  |                      |         |                                     |                 |                             |
| Mean diff, A1 - B1                     | 0,4615               |         |                                     |                 |                             |
| Mean diff, A2 - B2                     | -0,1618              |         |                                     |                 |                             |
| (A1 - B1) - (A2 - B2)                  | 0,6234               |         |                                     |                 |                             |
| 95% CI of difference                   | -0.2189 to 1.466     |         |                                     |                 |                             |
| (B1 - A1) - (B2 - A2)                  | -0,6234              |         |                                     |                 |                             |
| 95% CI of difference                   | -1.466 to 0.2189     |         |                                     |                 |                             |
| <b>Normality of Residuals</b>          |                      |         |                                     |                 |                             |
| Test name                              | Statistics           | P value | Passed normality test (alpha=0.05)? | P value summary |                             |
| D'Agostino-Pearson omnibus (K2)        | 5,369                | 0,0683  | Yes                                 | ns              |                             |
| Anderson-Darling (A2*)                 | 0,6148               | 0,0944  | Yes                                 | ns              |                             |
| Shapiro-Wilk (W)                       | 0,8996               | 0,0406  | No                                  | *               |                             |
| Kolmogorov-Smirnov (distance)          | 0,1602               | 0,1000  | Yes                                 | ns              |                             |
| <b>Data summary</b>                    |                      |         |                                     |                 |                             |
| Number of columns (Genotype)           | 2                    |         |                                     |                 |                             |
| Number of rows (Injury)                | 2                    |         |                                     |                 |                             |

|                         |    |  |  |  |
|-------------------------|----|--|--|--|
| <b>Number of values</b> | 20 |  |  |  |
|-------------------------|----|--|--|--|

2way ANOVA of Dagla cortex

| Table Analyzed                         | Dagla cortex         |         |                                     |                   |          |
|----------------------------------------|----------------------|---------|-------------------------------------|-------------------|----------|
| <b>Two-way ANOVA</b>                   | Ordinary             |         |                                     |                   |          |
| Alpha                                  | 0,05                 |         |                                     |                   |          |
| <b>Source of Variation</b>             | % of total variation | P value | P value summary                     | Significant?      |          |
| Interaction                            | 2,434                | <0.0001 | ****                                | Yes               |          |
| Injury                                 | 2,195                | <0.0001 | ****                                | Yes               |          |
| Genotype                               | 95,00                | <0.0001 | ****                                | Yes               |          |
| <b>ANOVA table</b>                     | SS (Type III)        | DF      | MS                                  | F (DFn, DFd)      | P value  |
| Interaction                            | 21,14                | 1       | 21,14                               | F (1, 16) = 34.14 | P<0.0001 |
| Injury                                 | 19,07                | 1       | 19,07                               | F (1, 16) = 30.80 | P<0.0001 |
| Genotype                               | 825,1                | 1       | 825,1                               | F (1, 16) = 1333  | P<0.0001 |
| Residual                               | 9,905                | 16      | 0,6190                              |                   |          |
| <b>Difference between column means</b> |                      |         |                                     |                   |          |
| Predicted (LS) mean of WT              | 0,9473               |         |                                     |                   |          |
| Predicted (LS) mean of APP-SWE         | 14,06                |         |                                     |                   |          |
| Difference between predicted means     | -13,11               |         |                                     |                   |          |
| SE of difference                       | 0,3591               |         |                                     |                   |          |
| 95% CI of difference                   | -13.87 to -12.35     |         |                                     |                   |          |
| <b>Difference between row means</b>    |                      |         |                                     |                   |          |
| Predicted (LS) mean of Sham            | 6,506                |         |                                     |                   |          |
| Predicted (LS) mean of mTBI            | 8,499                |         |                                     |                   |          |
| Difference between predicted means     | -1,993               |         |                                     |                   |          |
| SE of difference                       | 0,3591               |         |                                     |                   |          |
| 95% CI of difference                   | -2.754 to -1.232     |         |                                     |                   |          |
| <b>Interaction CI</b>                  |                      |         |                                     |                   |          |
| Mean diff, A1 - B1                     | -11,01               |         |                                     |                   |          |
| Mean diff, A2 - B2                     | -15,21               |         |                                     |                   |          |
| (A1 - B1) - (A2 - B2)                  | 4,197                |         |                                     |                   |          |
| 95% CI of difference                   | 2.674 to 5.720       |         |                                     |                   |          |
| (B1 - A1) - (B2 - A2)                  | -4,197               |         |                                     |                   |          |
| 95% CI of difference                   | -5.720 to -2.674     |         |                                     |                   |          |
| <b>Normality of Residuals</b>          |                      |         |                                     |                   |          |
| Test name                              | Statistics           | P value | Passed normality test (alpha=0.05)? | P value summary   |          |
| D'Agostino-Pearson omnibus (K2)        | 6,119                | 0,0469  | No                                  | *                 |          |
| Anderson-Darling (A2*)                 | 0,6032               | 0,1012  | Yes                                 | ns                |          |
| Shapiro-Wilk (W)                       | 0,9119               | 0,0694  | Yes                                 | ns                |          |
| Kolmogorov-Smirnov (distance)          | 0,1615               | 0,1000  | Yes                                 | ns                |          |
| <b>Data summary</b>                    |                      |         |                                     |                   |          |
| Number of columns (Genotype)           | 2                    |         |                                     |                   |          |
| Number of rows (Injury)                | 2                    |         |                                     |                   |          |

|                         |    |  |  |  |
|-------------------------|----|--|--|--|
| <b>Number of values</b> | 20 |  |  |  |
|-------------------------|----|--|--|--|

2way ANOVA of Magl cortex

| Table Analyzed                         | Magl cortex          |         |                                     |                     |                 |
|----------------------------------------|----------------------|---------|-------------------------------------|---------------------|-----------------|
| <b>Two-way ANOVA</b>                   | Ordinary             |         |                                     |                     |                 |
| Alpha                                  | 0,05                 |         |                                     |                     |                 |
| <b>Source of Variation</b>             | % of total variation | P value | P value summary                     |                     | Significant?    |
| Interaction                            | 0,1597               | 0,8188  | ns                                  |                     | No              |
| Injury                                 | 4,694                | 0,2249  | ns                                  |                     | No              |
| Genotype                               | 47,46                | 0,0010  | **                                  |                     | Yes             |
| <b>ANOVA table</b>                     | SS (Type III)        | DF      | MS                                  | F (DFn, DFd)        | P value         |
| Interaction                            | 0,008658             | 1       | 0,008658                            | F (1, 16) = 0.05423 | P=0.8188        |
| Injury                                 | 0,2544               | 1       | 0,2544                              | F (1, 16) = 1.594   | P=0.2249        |
| Genotype                               | 2,573                | 1       | 2,573                               | F (1, 16) = 16.12   | P=0.0010        |
| Residual                               | 2,555                | 16      | 0,1597                              |                     |                 |
| <b>Difference between column means</b> |                      |         |                                     |                     |                 |
| Predicted (LS) mean of WT              | 0,8636               |         |                                     |                     |                 |
| Predicted (LS) mean of APP-SWE         | 0,1315               |         |                                     |                     |                 |
| Difference between predicted means     | 0,7321               |         |                                     |                     |                 |
| SE of difference                       | 0,1824               |         |                                     |                     |                 |
| 95% CI of difference                   | 0.3455 to 1.119      |         |                                     |                     |                 |
| <b>Difference between row means</b>    |                      |         |                                     |                     |                 |
| Predicted (LS) mean of Sham            | 0,6127               |         |                                     |                     |                 |
| Predicted (LS) mean of mTBI            | 0,3825               |         |                                     |                     |                 |
| Difference between predicted means     | 0,2302               |         |                                     |                     |                 |
| SE of difference                       | 0,1824               |         |                                     |                     |                 |
| 95% CI of difference                   | -0.1564 to 0.6169    |         |                                     |                     |                 |
| <b>Interaction CI</b>                  |                      |         |                                     |                     |                 |
| Mean diff, A1 - B1                     | 0,7746               |         |                                     |                     |                 |
| Mean diff, A2 - B2                     | 0,6897               |         |                                     |                     |                 |
| (A1 - B1) - (A2 - B2)                  | 0,08494              |         |                                     |                     |                 |
| 95% CI of difference                   | -0.6883 to 0.8582    |         |                                     |                     |                 |
| (B1 - A1) - (B2 - A2)                  | -0,08494             |         |                                     |                     |                 |
| 95% CI of difference                   | -0.8582 to 0.6883    |         |                                     |                     |                 |
| <b>Normality of Residuals</b>          |                      |         |                                     |                     |                 |
| Test name                              | Statistics           | P value | Passed normality test (alpha=0.05)? |                     | P value summary |
| D'Agostino-Pearson omnibus (K2)        | 3,295                | 0,1926  | Yes                                 |                     | ns              |
| Anderson-Darling (A2*)                 | 0,5824               | 0,1145  | Yes                                 |                     | ns              |
| Shapiro-Wilk (W)                       | 0,9167               | 0,0857  | Yes                                 |                     | ns              |
| Kolmogorov-Smirnov (distance)          | 0,1859               | 0,0685  | Yes                                 |                     | ns              |
| <b>Data summary</b>                    |                      |         |                                     |                     |                 |
| Number of columns (Genotype)           | 2                    |         |                                     |                     |                 |
| Number of rows (Injury)                | 2                    |         |                                     |                     |                 |
| Number of values                       | 20                   |         |                                     |                     |                 |

2way ANOVA of Cb1 cortex

| Table Analyzed                         | Cb1 cortex           |         |                                     |                   |          |
|----------------------------------------|----------------------|---------|-------------------------------------|-------------------|----------|
| <b>Two-way ANOVA</b>                   | Ordinary             |         |                                     |                   |          |
| Alpha                                  | 0,05                 |         |                                     |                   |          |
| <b>Source of Variation</b>             | % of total variation | P value | P value summary                     | Significant?      |          |
| Interaction                            | 3,506                | <0.0001 | ****                                | Yes               |          |
| Injury                                 | 4,554                | <0.0001 | ****                                | Yes               |          |
| Genotype                               | 92,18                | <0.0001 | ****                                | Yes               |          |
| <b>ANOVA table</b>                     | SS (Type III)        | DF      | MS                                  | F (DFn, DFd)      | P value  |
| Interaction                            | 5,278                | 1       | 5,278                               | F (1, 16) = 51.32 | P<0.0001 |
| Injury                                 | 6,856                | 1       | 6,856                               | F (1, 16) = 66.67 | P<0.0001 |
| Genotype                               | 138,8                | 1       | 138,8                               | F (1, 16) = 1349  | P<0.0001 |
| Residual                               | 1,645                | 16      | 0,1028                              |                   |          |
| <b>Difference between column means</b> |                      |         |                                     |                   |          |
| Predicted (LS) mean of WT              | 1,073                |         |                                     |                   |          |
| Predicted (LS) mean of APP-SWE         | 6,450                |         |                                     |                   |          |
| Difference between predicted means     | -5,377               |         |                                     |                   |          |
| SE of difference                       | 0,1464               |         |                                     |                   |          |
| 95% CI of difference                   | -5.687 to -5.066     |         |                                     |                   |          |
| <b>Difference between row means</b>    |                      |         |                                     |                   |          |
| Predicted (LS) mean of Sham            | 3,164                |         |                                     |                   |          |
| Predicted (LS) mean of mTBI            | 4,359                |         |                                     |                   |          |
| Difference between predicted means     | -1,195               |         |                                     |                   |          |
| SE of difference                       | 0,1464               |         |                                     |                   |          |
| 95% CI of difference                   | -1.505 to -0.8848    |         |                                     |                   |          |
| <b>Interaction CI</b>                  |                      |         |                                     |                   |          |
| Mean diff, A1 - B1                     | -4,328               |         |                                     |                   |          |
| Mean diff, A2 - B2                     | -6,425               |         |                                     |                   |          |
| (A1 - B1) - (A2 - B2)                  | 2,097                |         |                                     |                   |          |
| 95% CI of difference                   | 1.477 to 2.718       |         |                                     |                   |          |
| (B1 - A1) - (B2 - A2)                  | -2,097               |         |                                     |                   |          |
| 95% CI of difference                   | -2.718 to -1.477     |         |                                     |                   |          |
| <b>Normality of Residuals</b>          |                      |         |                                     |                   |          |
| Test name                              | Statistics           | P value | Passed normality test (alpha=0.05)? | P value summary   |          |
| D'Agostino-Pearson omnibus (K2)        | 0,2610               | 0,8777  | Yes                                 | ns                |          |
| Anderson-Darling (A2*)                 | 0,1341               | 0,9744  | Yes                                 | ns                |          |
| Shapiro-Wilk (W)                       | 0,9844               | 0,9774  | Yes                                 | ns                |          |
| Kolmogorov-Smirnov (distance)          | 0,09623              | 0,1000  | Yes                                 | ns                |          |
| <b>Data summary</b>                    |                      |         |                                     |                   |          |
| Number of columns (Genotype)           | 2                    |         |                                     |                   |          |
| Number of rows (Injury)                | 2                    |         |                                     |                   |          |

|                         |    |  |  |  |
|-------------------------|----|--|--|--|
| <b>Number of values</b> | 20 |  |  |  |
|-------------------------|----|--|--|--|

2way ANOVA of Ppara cortex

| Table Analyzed                         | Ppara cortex         |         |                                     |                    |          |
|----------------------------------------|----------------------|---------|-------------------------------------|--------------------|----------|
| <b>Two-way ANOVA</b>                   | Ordinary             |         |                                     |                    |          |
| Alpha                                  | 0,05                 |         |                                     |                    |          |
| <b>Source of Variation</b>             | % of total variation | P value | P value summary                     | Significant?       |          |
| Interaction                            | 8,825                | 0,1762  | ns                                  | No                 |          |
| Injury                                 | 14,12                | 0,0924  | ns                                  | No                 |          |
| Genotype                               | 0,9406               | 0,6503  | ns                                  | No                 |          |
| <b>ANOVA table</b>                     | SS (Type III)        | DF      | MS                                  | F (DFn, DFd)       | P value  |
| Interaction                            | 1,556                | 1       | 1,556                               | F (1, 16) = 2.003  | P=0.1762 |
| Injury                                 | 2,489                | 1       | 2,489                               | F (1, 16) = 3.204  | P=0.0924 |
| Genotype                               | 0,1658               | 1       | 0,1658                              | F (1, 16) = 0.2134 | P=0.6503 |
| Residual                               | 12,43                | 16      | 0,7770                              |                    |          |
| <b>Difference between column means</b> |                      |         |                                     |                    |          |
| Predicted (LS) mean of WT              | 1,645                |         |                                     |                    |          |
| Predicted (LS) mean of APP-SWE         | 1,459                |         |                                     |                    |          |
| Difference between predicted means     | 0,1859               |         |                                     |                    |          |
| SE of difference                       | 0,4023               |         |                                     |                    |          |
| 95% CI of difference                   | -0.6670 to 1.039     |         |                                     |                    |          |
| <b>Difference between row means</b>    |                      |         |                                     |                    |          |
| Predicted (LS) mean of Sham            | 1,192                |         |                                     |                    |          |
| Predicted (LS) mean of mTBI            | 1,912                |         |                                     |                    |          |
| Difference between predicted means     | -0,7201              |         |                                     |                    |          |
| SE of difference                       | 0,4023               |         |                                     |                    |          |
| 95% CI of difference                   | -1.573 to 0.1328     |         |                                     |                    |          |
| <b>Interaction CI</b>                  |                      |         |                                     |                    |          |
| Mean diff, A1 - B1                     | -0,3835              |         |                                     |                    |          |
| Mean diff, A2 - B2                     | 0,7552               |         |                                     |                    |          |
| (A1 - B1) - (A2 - B2)                  | -1,139               |         |                                     |                    |          |
| 95% CI of difference                   | -2.845 to 0.5671     |         |                                     |                    |          |
| (B1 - A1) - (B2 - A2)                  | 1,139                |         |                                     |                    |          |
| 95% CI of difference                   | -0.5671 to 2.845     |         |                                     |                    |          |
| <b>Normality of Residuals</b>          |                      |         |                                     |                    |          |
| Test name                              | Statistics           | P value | Passed normality test (alpha=0.05)? | P value summary    |          |
| D'Agostino-Pearson omnibus (K2)        | 19,78                | <0.0001 | No                                  | ****               |          |
| Anderson-Darling (A2*)                 | 1,100                | 0,0053  | No                                  | **                 |          |
| Shapiro-Wilk (W)                       | 0,8246               | 0,0021  | No                                  | **                 |          |
| Kolmogorov-Smirnov (distance)          | 0,2176               | 0,0139  | No                                  | *                  |          |
| <b>Data summary</b>                    |                      |         |                                     |                    |          |
| Number of columns (Genotype)           | 2                    |         |                                     |                    |          |
| Number of rows (Injury)                | 2                    |         |                                     |                    |          |

|                         |    |  |  |  |
|-------------------------|----|--|--|--|
| <b>Number of values</b> | 20 |  |  |  |
|-------------------------|----|--|--|--|

2way ANOVA of Pparg cortex

| Table Analyzed                         | Pparg cortex         |         |                                     |                   |          |
|----------------------------------------|----------------------|---------|-------------------------------------|-------------------|----------|
| <b>Two-way ANOVA</b>                   | Ordinary             |         |                                     |                   |          |
| Alpha                                  | 0,05                 |         |                                     |                   |          |
| <b>Source of Variation</b>             | % of total variation | P value | P value summary                     | Significant?      |          |
| Interaction                            | 0,4335               | 0,1061  | ns                                  | No                |          |
| Injury                                 | 0,7067               | 0,0439  | *                                   | Yes               |          |
| Genotype                               | 96,22                | <0.0001 | ****                                | Yes               |          |
| <b>ANOVA table</b>                     | SS (Type III)        | DF      | MS                                  | F (DFn, DFd)      | P value  |
| Interaction                            | 0,9913               | 1       | 0,9913                              | F (1, 16) = 2.934 | P=0.1061 |
| Injury                                 | 1,616                | 1       | 1,616                               | F (1, 16) = 4.783 | P=0.0439 |
| Genotype                               | 220,0                | 1       | 220,0                               | F (1, 16) = 651.2 | P<0.0001 |
| Residual                               | 5,406                | 16      | 0,3379                              |                   |          |
| <b>Difference between column means</b> |                      |         |                                     |                   |          |
| Predicted (LS) mean of WT              | 1,517                |         |                                     |                   |          |
| Predicted (LS) mean of APP-SWE         | 8,288                |         |                                     |                   |          |
| Difference between predicted means     | -6,770               |         |                                     |                   |          |
| SE of difference                       | 0,2653               |         |                                     |                   |          |
| 95% CI of difference                   | -7.333 to -6.208     |         |                                     |                   |          |
| <b>Difference between row means</b>    |                      |         |                                     |                   |          |
| Predicted (LS) mean of Sham            | 4,612                |         |                                     |                   |          |
| Predicted (LS) mean of mTBI            | 5,193                |         |                                     |                   |          |
| Difference between predicted means     | -0,5802              |         |                                     |                   |          |
| SE of difference                       | 0,2653               |         |                                     |                   |          |
| 95% CI of difference                   | -1.143 to -0.01778   |         |                                     |                   |          |
| <b>Interaction CI</b>                  |                      |         |                                     |                   |          |
| Mean diff, A1 - B1                     | -7,225               |         |                                     |                   |          |
| Mean diff, A2 - B2                     | -6,316               |         |                                     |                   |          |
| (A1 - B1) - (A2 - B2)                  | -0,9089              |         |                                     |                   |          |
| 95% CI of difference                   | -2.034 to 0.2160     |         |                                     |                   |          |
| (B1 - A1) - (B2 - A2)                  | 0,9089               |         |                                     |                   |          |
| 95% CI of difference                   | -0.2160 to 2.034     |         |                                     |                   |          |
| <b>Normality of Residuals</b>          |                      |         |                                     |                   |          |
| Test name                              | Statistics           | P value | Passed normality test (alpha=0.05)? | P value summary   |          |
| D'Agostino-Pearson omnibus (K2)        | 1,309                | 0,5196  | Yes                                 | ns                |          |
| Anderson-Darling (A2*)                 | 0,7500               | 0,0424  | No                                  | *                 |          |
| Shapiro-Wilk (W)                       | 0,9321               | 0,1692  | Yes                                 | ns                |          |
| Kolmogorov-Smirnov (distance)          | 0,1812               | 0,0841  | Yes                                 | ns                |          |
| <b>Data summary</b>                    |                      |         |                                     |                   |          |
| Number of columns (Genotype)           | 2                    |         |                                     |                   |          |
| Number of rows (Injury)                | 2                    |         |                                     |                   |          |

|                         |    |  |  |  |
|-------------------------|----|--|--|--|
| <b>Number of values</b> | 20 |  |  |  |
|-------------------------|----|--|--|--|

2way ANOVA of Napepld hipp

| Table Analyzed                         | Napepld hipp         |         |                                     |                     |              |
|----------------------------------------|----------------------|---------|-------------------------------------|---------------------|--------------|
| <b>Two-way ANOVA</b>                   | Ordinary             |         |                                     |                     |              |
| <b>Alpha</b>                           | 0,05                 |         |                                     |                     |              |
| <b>Source of Variation</b>             | % of total variation | P value | P value summary                     |                     | Significant? |
| <b>Interaction</b>                     | 0,1377               | 0,8208  | ns                                  |                     | No           |
| <b>Injury</b>                          | 13,99                | 0,0379  | *                                   |                     | Yes          |
| <b>Genotype</b>                        | 55,04                | 0,0006  | ***                                 |                     | Yes          |
| <b>ANOVA table</b>                     | SS                   | DF      | MS                                  | F (DFn, DFd)        | P value      |
| <b>Interaction</b>                     | 0,004567             | 1       | 0,004567                            | F (1, 12) = 0.05358 | P=0.8208     |
| <b>Injury</b>                          | 0,4638               | 1       | 0,4638                              | F (1, 12) = 5.442   | P=0.0379     |
| <b>Genotype</b>                        | 1,825                | 1       | 1,825                               | F (1, 12) = 21.41   | P=0.0006     |
| <b>Residual</b>                        | 1,023                | 12      | 0,08524                             |                     |              |
| <b>Difference between column means</b> |                      |         |                                     |                     |              |
| <b>Mean of WT</b>                      | 0,8466               |         |                                     |                     |              |
| <b>Mean of APP-SWE</b>                 | 1,522                |         |                                     |                     |              |
| <b>Difference between means</b>        | -0,6755              |         |                                     |                     |              |
| <b>SE of difference</b>                | 0,1460               |         |                                     |                     |              |
| <b>95% CI of difference</b>            | -0.9936 to -0.3575   |         |                                     |                     |              |
| <b>Difference between row means</b>    |                      |         |                                     |                     |              |
| <b>Mean of Sham</b>                    | 1,355                |         |                                     |                     |              |
| <b>Mean of mTBI</b>                    | 1,014                |         |                                     |                     |              |
| <b>Difference between means</b>        | 0,3405               |         |                                     |                     |              |
| <b>SE of difference</b>                | 0,1460               |         |                                     |                     |              |
| <b>95% CI of difference</b>            | 0.02247 to 0.6586    |         |                                     |                     |              |
| <b>Interaction CI</b>                  |                      |         |                                     |                     |              |
| <b>Mean diff, A1 - B1</b>              | -0,7093              |         |                                     |                     |              |
| <b>Mean diff, A2 - B2</b>              | -0,6417              |         |                                     |                     |              |
| <b>(A1 -B1) - (A2 - B2)</b>            | -0,06758             |         |                                     |                     |              |
| <b>95% CI of difference</b>            | -0.7037 to 0.5685    |         |                                     |                     |              |
| <b>(B1 - A1) - (B2 - A2)</b>           | 0,06758              |         |                                     |                     |              |
| <b>95% CI of difference</b>            | -0.5685 to 0.7037    |         |                                     |                     |              |
| <b>Normality of Residuals</b>          |                      |         |                                     |                     |              |
| <b>Test name</b>                       | Statistics           | P value | Passed normality test (alpha=0.05)? | P value summary     |              |
| <b>D'Agostino-Pearson omnibus (K2)</b> | 10,79                | 0,0045  | No                                  | **                  |              |
| <b>Anderson-Darling (A2*)</b>          | 0,6631               | 0,0676  | Yes                                 | ns                  |              |
| <b>Shapiro-Wilk (W)</b>                | 0,8681               | 0,0254  | No                                  | *                   |              |
| <b>Kolmogorov-Smirnov (distance)</b>   | 0,2134               | 0,0498  | No                                  | *                   |              |
| <b>Data summary</b>                    |                      |         |                                     |                     |              |

|                                     |    |  |  |  |  |
|-------------------------------------|----|--|--|--|--|
| <b>Number of columns (Genotype)</b> | 2  |  |  |  |  |
| <b>Number of rows (Injury)</b>      | 2  |  |  |  |  |
| <b>Number of values</b>             | 16 |  |  |  |  |

2way ANOVA of Gde1 hipp

| Table Analyzed                         | Gde1 hipp            |         |                                     |  |                              |
|----------------------------------------|----------------------|---------|-------------------------------------|--|------------------------------|
| <b>Two-way ANOVA</b>                   | Ordinary             |         |                                     |  |                              |
| Alpha                                  | 0,05                 |         |                                     |  |                              |
| <b>Source of Variation</b>             | % of total variation | P value | P value summary                     |  | Significant?                 |
| Interaction                            | 1,771                | 0,2159  | ns                                  |  | No                           |
| Injury                                 | 0,05964              | 0,8146  | ns                                  |  | No                           |
| Genotype                               | 85,72                | <0.0001 | ****                                |  | Yes                          |
| <b>ANOVA table</b>                     | SS                   | DF      | MS                                  |  | F (DFn, DFd) P value         |
| Interaction                            | 0,06592              | 1       | 0,06592                             |  | F (1, 12) = 1.707 P=0.2159   |
| Injury                                 | 0,002220             | 1       | 0,002220                            |  | F (1, 12) = 0.05747 P=0.8146 |
| Genotype                               | 3,191                | 1       | 3,191                               |  | F (1, 12) = 82.60 P<0.0001   |
| Residual                               | 0,4635               | 12      | 0,03863                             |  |                              |
| <b>Difference between column means</b> |                      |         |                                     |  |                              |
| Mean of WT                             | 0,9240               |         |                                     |  |                              |
| Mean of APP-SWE                        | 1,817                |         |                                     |  |                              |
| Difference between means               | -0,8931              |         |                                     |  |                              |
| SE of difference                       | 0,09827              |         |                                     |  |                              |
| 95% CI of difference                   | -1.107 to -0.6790    |         |                                     |  |                              |
| <b>Difference between row means</b>    |                      |         |                                     |  |                              |
| Mean of Sham                           | 1,382                |         |                                     |  |                              |
| Mean of mTBI                           | 1,359                |         |                                     |  |                              |
| Difference between means               | 0,02356              |         |                                     |  |                              |
| SE of difference                       | 0,09827              |         |                                     |  |                              |
| 95% CI of difference                   | -0.1906 to 0.2377    |         |                                     |  |                              |
| <b>Interaction CI</b>                  |                      |         |                                     |  |                              |
| Mean diff, A1 - B1                     | -0,7647              |         |                                     |  |                              |
| Mean diff, A2 - B2                     | -1,021               |         |                                     |  |                              |
| (A1 - B1) - (A2 - B2)                  | 0,2568               |         |                                     |  |                              |
| 95% CI of difference                   | -0.1715 to 0.6850    |         |                                     |  |                              |
| (B1 - A1) - (B2 - A2)                  | -0,2568              |         |                                     |  |                              |
| 95% CI of difference                   | -0.6850 to 0.1715    |         |                                     |  |                              |
| <b>Normality of Residuals</b>          |                      |         |                                     |  |                              |
| Test name                              | Statistics           | P value | Passed normality test (alpha=0.05)? |  | P value summary              |
| D'Agostino-Pearson omnibus (K2)        | 1,874                | 0,3918  | Yes                                 |  | ns                           |
| Anderson-Darling (A2*)                 | 0,3199               | 0,5039  | Yes                                 |  | ns                           |
| Shapiro-Wilk (W)                       | 0,9477               | 0,4537  | Yes                                 |  | ns                           |
| Kolmogorov-Smirnov (distance)          | 0,1508               | 0,1000  | Yes                                 |  | ns                           |
| <b>Data summary</b>                    |                      |         |                                     |  |                              |
| Number of columns (Genotype)           | 2                    |         |                                     |  |                              |

|                                |    |  |  |  |  |
|--------------------------------|----|--|--|--|--|
| <b>Number of rows (Injury)</b> | 2  |  |  |  |  |
| <b>Number of values</b>        | 16 |  |  |  |  |

2way ANOVA of Faah hipp

| Table Analyzed                         | Faah hipp            |         |                                     |                   |          |
|----------------------------------------|----------------------|---------|-------------------------------------|-------------------|----------|
| <b>Two-way ANOVA</b>                   | Ordinary             |         |                                     |                   |          |
| <b>Alpha</b>                           | 0,05                 |         |                                     |                   |          |
| <b>Source of Variation</b>             | % of total variation | P value | P value summary                     | Significant?      |          |
| <b>Interaction</b>                     | 7,260                | 0,1554  | ns                                  | No                |          |
| <b>Injury</b>                          | 4,677                | 0,2471  | ns                                  | No                |          |
| <b>Genotype</b>                        | 50,16                | 0,0018  | **                                  | Yes               |          |
| <b>ANOVA table</b>                     | SS                   | DF      | MS                                  | F (DFn, DFd)      | P value  |
| <b>Interaction</b>                     | 0,1243               | 1       | 0,1243                              | F (1, 12) = 2.298 | P=0.1554 |
| <b>Injury</b>                          | 0,08007              | 1       | 0,08007                             | F (1, 12) = 1.481 | P=0.2471 |
| <b>Genotype</b>                        | 0,8586               | 1       | 0,8586                              | F (1, 12) = 15.88 | P=0.0018 |
| <b>Residual</b>                        | 0,6489               | 12      | 0,05408                             |                   |          |
| <b>Difference between column means</b> |                      |         |                                     |                   |          |
| <b>Mean of WT</b>                      | 0,9826               |         |                                     |                   |          |
| <b>Mean of APP-SWE</b>                 | 1,446                |         |                                     |                   |          |
| <b>Difference between means</b>        | -0,4633              |         |                                     |                   |          |
| <b>SE of difference</b>                | 0,1163               |         |                                     |                   |          |
| <b>95% CI of difference</b>            | -0.7166 to -0.2100   |         |                                     |                   |          |
| <b>Difference between row means</b>    |                      |         |                                     |                   |          |
| <b>Mean of Sham</b>                    | 1,144                |         |                                     |                   |          |
| <b>Mean of mTBI</b>                    | 1,285                |         |                                     |                   |          |
| <b>Difference between means</b>        | -0,1415              |         |                                     |                   |          |
| <b>SE of difference</b>                | 0,1163               |         |                                     |                   |          |
| <b>95% CI of difference</b>            | -0.3948 to 0.1119    |         |                                     |                   |          |
| <b>Interaction CI</b>                  |                      |         |                                     |                   |          |
| <b>Mean diff, A1 - B1</b>              | -0,2870              |         |                                     |                   |          |
| <b>Mean diff, A2 - B2</b>              | -0,6396              |         |                                     |                   |          |
| <b>(A1 -B1) - (A2 - B2)</b>            | 0,3525               |         |                                     |                   |          |
| <b>95% CI of difference</b>            | -0.1541 to 0.8592    |         |                                     |                   |          |
| <b>(B1 - A1) - (B2 - A2)</b>           | -0,3525              |         |                                     |                   |          |
| <b>95% CI of difference</b>            | -0.8592 to 0.1541    |         |                                     |                   |          |
| <b>Normality of Residuals</b>          |                      |         |                                     |                   |          |
| <b>Test name</b>                       | Statistics           | P value | Passed normality test (alpha=0.05)? | P value summary   |          |
| <b>D'Agostino-Pearson omnibus (K2)</b> | 8,786                | 0,0124  | No                                  | *                 |          |
| <b>Anderson-Darling (A2*)</b>          | 0,8020               | 0,0294  | No                                  | *                 |          |
| <b>Shapiro-Wilk (W)</b>                | 0,8714               | 0,0285  | No                                  | *                 |          |
| <b>Kolmogorov-Smirnov (distance)</b>   | 0,2111               | 0,0550  | Yes                                 | ns                |          |
| <b>Data summary</b>                    |                      |         |                                     |                   |          |

|                                     |    |  |  |  |  |
|-------------------------------------|----|--|--|--|--|
| <b>Number of columns (Genotype)</b> | 2  |  |  |  |  |
| <b>Number of rows (Injury)</b>      | 2  |  |  |  |  |
| <b>Number of values</b>             | 16 |  |  |  |  |

2way ANOVA of Dagla hipp

| Table Analyzed                         | Dagla hipp           |         |                                     |              |                    |
|----------------------------------------|----------------------|---------|-------------------------------------|--------------|--------------------|
| <b>Two-way ANOVA</b>                   | Ordinary             |         |                                     |              |                    |
| <b>Alpha</b>                           | 0,05                 |         |                                     |              |                    |
| <b>Source of Variation</b>             | % of total variation | P value | P value summary                     |              | Significant?       |
| <b>Interaction</b>                     | 0,2469               | 0,7057  | ns                                  |              | No                 |
| <b>Injury</b>                          | 5,343                | 0,0972  | ns                                  |              | No                 |
| <b>Genotype</b>                        | 74,60                | <0.0001 | ****                                |              | Yes                |
| <b>ANOVA table</b>                     | SS                   | DF      | MS                                  | F (DFn, DFd) | P value            |
| <b>Interaction</b>                     | 0,01094              | 1       |                                     | 0,01094      | F (1, 12) = 0.1496 |
| <b>Injury</b>                          | 0,2368               | 1       |                                     | 0,2368       | F (1, 12) = 3.237  |
| <b>Genotype</b>                        | 3,306                | 1       |                                     | 3,306        | F (1, 12) = 45.19  |
| <b>Residual</b>                        | 0,8780               | 12      |                                     | 0,07317      |                    |
| <b>Difference between column means</b> |                      |         |                                     |              |                    |
| <b>Mean of WT</b>                      | 0,9045               |         |                                     |              |                    |
| <b>Mean of APP-SWE</b>                 | 1,814                |         |                                     |              |                    |
| <b>Difference between means</b>        | -0,9092              |         |                                     |              |                    |
| <b>SE of difference</b>                | 0,1352               |         |                                     |              |                    |
| <b>95% CI of difference</b>            | -1.204 to -0.6145    |         |                                     |              |                    |
| <b>Difference between row means</b>    |                      |         |                                     |              |                    |
| <b>Mean of Sham</b>                    | 1,481                |         |                                     |              |                    |
| <b>Mean of mTBI</b>                    | 1,237                |         |                                     |              |                    |
| <b>Difference between means</b>        | 0,2433               |         |                                     |              |                    |
| <b>SE of difference</b>                | 0,1352               |         |                                     |              |                    |
| <b>95% CI of difference</b>            | -0.05136 to 0.5380   |         |                                     |              |                    |
| <b>Interaction CI</b>                  |                      |         |                                     |              |                    |
| <b>Mean diff, A1 - B1</b>              | -0,9615              |         |                                     |              |                    |
| <b>Mean diff, A2 - B2</b>              | -0,8569              |         |                                     |              |                    |
| <b>(A1 -B1) - (A2 - B2)</b>            | -0,1046              |         |                                     |              |                    |
| <b>95% CI of difference</b>            | -0.6940 to 0.4847    |         |                                     |              |                    |
| <b>(B1 - A1) - (B2 - A2)</b>           | 0,1046               |         |                                     |              |                    |
| <b>95% CI of difference</b>            | -0.4847 to 0.6940    |         |                                     |              |                    |
| <b>Normality of Residuals</b>          |                      |         |                                     |              |                    |
| <b>Test name</b>                       | Statistics           | P value | Passed normality test (alpha=0.05)? |              | P value summary    |
| <b>D'Agostino-Pearson omnibus (K2)</b> | 1,250                | 0,5354  | Yes                                 |              | ns                 |
| <b>Anderson-Darling (A2*)</b>          | 0,2495               | 0,6999  | Yes                                 |              | ns                 |
| <b>Shapiro-Wilk (W)</b>                | 0,9758               | 0,9214  | Yes                                 |              | ns                 |
| <b>Kolmogorov-Smirnov (distance)</b>   | 0,1239               | 0,1000  | Yes                                 |              | ns                 |
| <b>Data summary</b>                    |                      |         |                                     |              |                    |

|                                     |    |  |  |  |  |
|-------------------------------------|----|--|--|--|--|
| <b>Number of columns (Genotype)</b> | 2  |  |  |  |  |
| <b>Number of rows (Injury)</b>      | 2  |  |  |  |  |
| <b>Number of values</b>             | 16 |  |  |  |  |

2way ANOVA of Magl hipp

| Table Analyzed                         | Magl hipp            |         |                                     |                 |                     |
|----------------------------------------|----------------------|---------|-------------------------------------|-----------------|---------------------|
| <b>Two-way ANOVA</b>                   | Ordinary             |         |                                     |                 |                     |
| <b>Alpha</b>                           | 0,05                 |         |                                     |                 |                     |
| <b>Source of Variation</b>             | % of total variation | P value | P value summary                     | Significant?    |                     |
| <b>Interaction</b>                     | 0,4712               | 0,7848  | ns                                  | No              |                     |
| <b>Injury</b>                          | 9,465                | 0,2346  | ns                                  | No              |                     |
| <b>Genotype</b>                        | 17,53                | 0,1143  | ns                                  | No              |                     |
| <b>ANOVA table</b>                     | SS                   | DF      | MS                                  | F (DFn, DFd)    | P value             |
| <b>Interaction</b>                     | 0,07526              | 1       |                                     | 0,07526         | F (1, 12) = 0.07797 |
| <b>Injury</b>                          | 1,512                | 1       |                                     | 1,512           | F (1, 12) = 1.566   |
| <b>Genotype</b>                        | 2,800                | 1       |                                     | 2,800           | F (1, 12) = 2.901   |
| <b>Residual</b>                        | 11,58                | 12      |                                     | 0,9653          |                     |
| <b>Difference between column means</b> |                      |         |                                     |                 |                     |
| <b>Mean of WT</b>                      | 0,7612               |         |                                     |                 |                     |
| <b>Mean of APP-SWE</b>                 | 1,598                |         |                                     |                 |                     |
| <b>Difference between means</b>        | -0,8367              |         |                                     |                 |                     |
| <b>SE of difference</b>                | 0,4913               |         |                                     |                 |                     |
| <b>95% CI of difference</b>            | -1.907 to 0.2336     |         |                                     |                 |                     |
| <b>Difference between row means</b>    |                      |         |                                     |                 |                     |
| <b>Mean of Sham</b>                    | 1,487                |         |                                     |                 |                     |
| <b>Mean of mTBI</b>                    | 0,8722               |         |                                     |                 |                     |
| <b>Difference between means</b>        | 0,6147               |         |                                     |                 |                     |
| <b>SE of difference</b>                | 0,4913               |         |                                     |                 |                     |
| <b>95% CI of difference</b>            | -0.4556 to 1.685     |         |                                     |                 |                     |
| <b>Interaction CI</b>                  |                      |         |                                     |                 |                     |
| <b>Mean diff, A1 - B1</b>              | -0,9739              |         |                                     |                 |                     |
| <b>Mean diff, A2 - B2</b>              | -0,6995              |         |                                     |                 |                     |
| <b>(A1 -B1) - (A2 - B2)</b>            | -0,2743              |         |                                     |                 |                     |
| <b>95% CI of difference</b>            | -2.415 to 1.866      |         |                                     |                 |                     |
| <b>(B1 - A1) - (B2 - A2)</b>           | 0,2743               |         |                                     |                 |                     |
| <b>95% CI of difference</b>            | -1.866 to 2.415      |         |                                     |                 |                     |
| <b>Normality of Residuals</b>          |                      |         |                                     |                 |                     |
| <b>Test name</b>                       | Statistics           | P value | Passed normality test (alpha=0.05)? | P value summary |                     |
| <b>D'Agostino-Pearson omnibus (K2)</b> | 6,711                | 0,0349  | No                                  | *               |                     |
| <b>Anderson-Darling (A2*)</b>          | 0,5627               | 0,1211  | Yes                                 | ns              |                     |
| <b>Shapiro-Wilk (W)</b>                | 0,9214               | 0,1779  | Yes                                 | ns              |                     |
| <b>Kolmogorov-Smirnov (distance)</b>   | 0,1835               | 0,1000  | Yes                                 | ns              |                     |
| <b>Data summary</b>                    |                      |         |                                     |                 |                     |

|                                     |    |  |  |  |  |
|-------------------------------------|----|--|--|--|--|
| <b>Number of columns (Genotype)</b> | 2  |  |  |  |  |
| <b>Number of rows (Injury)</b>      | 2  |  |  |  |  |
| <b>Number of values</b>             | 16 |  |  |  |  |

2way ANOVA of Cb1 hipp

| Table Analyzed                         | Cb1 hipp             |         |                                     |  |                            |
|----------------------------------------|----------------------|---------|-------------------------------------|--|----------------------------|
| <b>Two-way ANOVA</b>                   | Ordinary             |         |                                     |  |                            |
| <b>Alpha</b>                           | 0,05                 |         |                                     |  |                            |
| <b>Source of Variation</b>             | % of total variation | P value | P value summary                     |  | Significant?               |
| <b>Interaction</b>                     | 4,508                | 0,2359  | ns                                  |  | No                         |
| <b>Injury</b>                          | 15,35                | 0,0400  | *                                   |  | Yes                        |
| <b>Genotype</b>                        | 45,40                | 0,0019  | **                                  |  | Yes                        |
| <b>ANOVA table</b>                     | SS                   | DF      | MS                                  |  | F (DFn, DFd) P value       |
| <b>Interaction</b>                     | 0,03596              | 1       | 0,03596                             |  | F (1, 12) = 1.557 P=0.2359 |
| <b>Injury</b>                          | 0,1225               | 1       | 0,1225                              |  | F (1, 12) = 5.303 P=0.0400 |
| <b>Genotype</b>                        | 0,3622               | 1       | 0,3622                              |  | F (1, 12) = 15.68 P=0.0019 |
| <b>Residual</b>                        | 0,2771               | 12      | 0,02309                             |  |                            |
| <b>Difference between column means</b> |                      |         |                                     |  |                            |
| <b>Mean of WT</b>                      | 0,8651               |         |                                     |  |                            |
| <b>Mean of APP-SWE</b>                 | 1,166                |         |                                     |  |                            |
| <b>Difference between means</b>        | -0,3009              |         |                                     |  |                            |
| <b>SE of difference</b>                | 0,07598              |         |                                     |  |                            |
| <b>95% CI of difference</b>            | -0.4665 to -0.1354   |         |                                     |  |                            |
| <b>Difference between row means</b>    |                      |         |                                     |  |                            |
| <b>Mean of Sham</b>                    | 1,103                |         |                                     |  |                            |
| <b>Mean of mTBI</b>                    | 0,9281               |         |                                     |  |                            |
| <b>Difference between means</b>        | 0,1750               |         |                                     |  |                            |
| <b>SE of difference</b>                | 0,07598              |         |                                     |  |                            |
| <b>95% CI of difference</b>            | 0.009419 to 0.3405   |         |                                     |  |                            |
| <b>Interaction CI</b>                  |                      |         |                                     |  |                            |
| <b>Mean diff, A1 - B1</b>              | -0,2061              |         |                                     |  |                            |
| <b>Mean diff, A2 - B2</b>              | -0,3957              |         |                                     |  |                            |
| <b>(A1 -B1) - (A2 - B2)</b>            | 0,1896               |         |                                     |  |                            |
| <b>95% CI of difference</b>            | -0.1415 to 0.5207    |         |                                     |  |                            |
| <b>(B1 - A1) - (B2 - A2)</b>           | -0,1896              |         |                                     |  |                            |
| <b>95% CI of difference</b>            | -0.5207 to 0.1415    |         |                                     |  |                            |
| <b>Normality of Residuals</b>          |                      |         |                                     |  |                            |
| <b>Test name</b>                       | Statistics           | P value | Passed normality test (alpha=0.05)? |  | P value summary            |
| <b>D'Agostino-Pearson omnibus (K2)</b> | 2,271                | 0,3212  | Yes                                 |  | ns                         |
| <b>Anderson-Darling (A2*)</b>          | 0,2881               | 0,5711  | Yes                                 |  | ns                         |
| <b>Shapiro-Wilk (W)</b>                | 0,9509               | 0,5042  | Yes                                 |  | ns                         |
| <b>Kolmogorov-Smirnov (distance)</b>   | 0,1363               | 0,1000  | Yes                                 |  | ns                         |
| <b>Data summary</b>                    |                      |         |                                     |  |                            |

|                                     |    |  |  |  |  |
|-------------------------------------|----|--|--|--|--|
| <b>Number of columns (Genotype)</b> | 2  |  |  |  |  |
| <b>Number of rows (Injury)</b>      | 2  |  |  |  |  |
| <b>Number of values</b>             | 16 |  |  |  |  |

2way ANOVA of Ppara hipp

| Table Analyzed                         | Ppara hipp           |         |                                     |                           |          |
|----------------------------------------|----------------------|---------|-------------------------------------|---------------------------|----------|
| <b>Two-way ANOVA</b>                   | Ordinary             |         |                                     |                           |          |
| <b>Alpha</b>                           | 0,05                 |         |                                     |                           |          |
| <b>Source of Variation</b>             | % of total variation | P value | P value summary                     | Significant?              |          |
| <b>Interaction</b>                     | 20,73                | 0,0037  | **                                  | Yes                       |          |
| <b>Injury</b>                          | 2,152                | 0,2703  | ns                                  | No                        |          |
| <b>Genotype</b>                        | 57,79                | <0.0001 | ****                                | Yes                       |          |
| <b>ANOVA table</b>                     | SS                   | DF      | MS                                  | F (DFn, DFd)              | P value  |
| <b>Interaction</b>                     | 0,3246               | 1       |                                     | 0,3246 F (1, 12) = 12.86  | P=0.0037 |
| <b>Injury</b>                          | 0,03370              | 1       |                                     | 0,03370 F (1, 12) = 1.336 | P=0.2703 |
| <b>Genotype</b>                        | 0,9050               | 1       |                                     | 0,9050 F (1, 12) = 35.87  | P<0.0001 |
| <b>Residual</b>                        | 0,3028               | 12      |                                     | 0,02523                   |          |
| <b>Difference between column means</b> |                      |         |                                     |                           |          |
| <b>Mean of WT</b>                      | 0,8117               |         |                                     |                           |          |
| <b>Mean of APP-SWE</b>                 | 0,3360               |         |                                     |                           |          |
| <b>Difference between means</b>        | 0,4757               |         |                                     |                           |          |
| <b>SE of difference</b>                | 0,07942              |         |                                     |                           |          |
| <b>95% CI of difference</b>            | 0.3026 to 0.6487     |         |                                     |                           |          |
| <b>Difference between row means</b>    |                      |         |                                     |                           |          |
| <b>Mean of Sham</b>                    | 0,6197               |         |                                     |                           |          |
| <b>Mean of mTBI</b>                    | 0,5280               |         |                                     |                           |          |
| <b>Difference between means</b>        | 0,09179              |         |                                     |                           |          |
| <b>SE of difference</b>                | 0,07942              |         |                                     |                           |          |
| <b>95% CI of difference</b>            | -0.08125 to 0.2648   |         |                                     |                           |          |
| <b>Interaction CI</b>                  |                      |         |                                     |                           |          |
| <b>Mean diff, A1 - B1</b>              | 0,7605               |         |                                     |                           |          |
| <b>Mean diff, A2 - B2</b>              | 0,1908               |         |                                     |                           |          |
| <b>(A1 -B1) - (A2 - B2)</b>            | 0,5697               |         |                                     |                           |          |
| <b>95% CI of difference</b>            | 0.2236 to 0.9158     |         |                                     |                           |          |
| <b>(B1 - A1) - (B2 - A2)</b>           | -0,5697              |         |                                     |                           |          |
| <b>95% CI of difference</b>            | -0.9158 to -0.2236   |         |                                     |                           |          |
| <b>Normality of Residuals</b>          |                      |         |                                     |                           |          |
| <b>Test name</b>                       | Statistics           | P value | Passed normality test (alpha=0.05)? | P value summary           |          |
| <b>D'Agostino-Pearson omnibus (K2)</b> | 0,6883               | 0,7088  | Yes                                 | ns                        |          |
| <b>Anderson-Darling (A2*)</b>          | 0,1990               | 0,8610  | Yes                                 | ns                        |          |
| <b>Shapiro-Wilk (W)</b>                | 0,9820               | 0,9775  | Yes                                 | ns                        |          |
| <b>Kolmogorov-Smirnov (distance)</b>   | 0,1107               | 0,1000  | Yes                                 | ns                        |          |
| <b>Data summary</b>                    |                      |         |                                     |                           |          |

|                                     |    |  |  |  |  |
|-------------------------------------|----|--|--|--|--|
| <b>Number of columns (Genotype)</b> | 2  |  |  |  |  |
| <b>Number of rows (Injury)</b>      | 2  |  |  |  |  |
| <b>Number of values</b>             | 16 |  |  |  |  |

2way ANOVA of Pparg hipp

| Table Analyzed                         | Pparg hipp           |         |                                     |              |                   |          |
|----------------------------------------|----------------------|---------|-------------------------------------|--------------|-------------------|----------|
| <b>Two-way ANOVA</b>                   | Ordinary             |         |                                     |              |                   |          |
| <b>Alpha</b>                           | 0,05                 |         |                                     |              |                   |          |
| <b>Source of Variation</b>             | % of total variation | P value | P value summary                     |              | Significant?      |          |
| <b>Interaction</b>                     | 8,959                | <0.0001 | ****                                |              | Yes               |          |
| <b>Injury</b>                          | 3,234                | 0,0030  | **                                  |              | Yes               |          |
| <b>Genotype</b>                        | 84,99                | <0.0001 | ****                                |              | Yes               |          |
| <b>ANOVA table</b>                     | SS                   | DF      | MS                                  | F (DFn, DFd) | P value           |          |
| <b>Interaction</b>                     | 2,061                | 1       |                                     | 2,061        | F (1, 12) = 38.19 | P<0.0001 |
| <b>Injury</b>                          | 0,7442               | 1       |                                     | 0,7442       | F (1, 12) = 13.79 | P=0.0030 |
| <b>Genotype</b>                        | 19,56                | 1       |                                     | 19,56        | F (1, 12) = 362.3 | P<0.0001 |
| <b>Residual</b>                        | 0,6478               | 12      |                                     | 0,05398      |                   |          |
| <b>Difference between column means</b> |                      |         |                                     |              |                   |          |
| <b>Mean of WT</b>                      | 0,8567               |         |                                     |              |                   |          |
| <b>Mean of APP-SWE</b>                 | 3,068                |         |                                     |              |                   |          |
| <b>Difference between means</b>        | -2,211               |         |                                     |              |                   |          |
| <b>SE of difference</b>                | 0,1162               |         |                                     |              |                   |          |
| <b>95% CI of difference</b>            | -2.464 to -1.958     |         |                                     |              |                   |          |
| <b>Difference between row means</b>    |                      |         |                                     |              |                   |          |
| <b>Mean of Sham</b>                    | 1,747                |         |                                     |              |                   |          |
| <b>Mean of mTBI</b>                    | 2,178                |         |                                     |              |                   |          |
| <b>Difference between means</b>        | -0,4313              |         |                                     |              |                   |          |
| <b>SE of difference</b>                | 0,1162               |         |                                     |              |                   |          |
| <b>95% CI of difference</b>            | -0.6844 to -0.1782   |         |                                     |              |                   |          |
| <b>Interaction CI</b>                  |                      |         |                                     |              |                   |          |
| <b>Mean diff, A1 - B1</b>              | -1,493               |         |                                     |              |                   |          |
| <b>Mean diff, A2 - B2</b>              | -2,929               |         |                                     |              |                   |          |
| <b>(A1 -B1) - (A2 - B2)</b>            | 1,436                |         |                                     |              |                   |          |
| <b>95% CI of difference</b>            | 0.9295 to 1.942      |         |                                     |              |                   |          |
| <b>(B1 - A1) - (B2 - A2)</b>           | -1,436               |         |                                     |              |                   |          |
| <b>95% CI of difference</b>            | -1.942 to -0.9295    |         |                                     |              |                   |          |
| <b>Normality of Residuals</b>          |                      |         |                                     |              |                   |          |
| <b>Test name</b>                       | Statistics           | P value | Passed normality test (alpha=0.05)? |              | P value summary   |          |
| <b>D'Agostino-Pearson omnibus (K2)</b> | 2,233                | 0,3274  | Yes                                 |              | ns                |          |
| <b>Anderson-Darling (A2*)</b>          | 0,4595               | 0,2270  | Yes                                 |              | ns                |          |
| <b>Shapiro-Wilk (W)</b>                | 0,9378               | 0,3224  | Yes                                 |              | ns                |          |
| <b>Kolmogorov-Smirnov (distance)</b>   | 0,1669               | 0,1000  | Yes                                 |              | ns                |          |
| <b>Data summary</b>                    |                      |         |                                     |              |                   |          |

|                                     |    |  |  |  |  |
|-------------------------------------|----|--|--|--|--|
| <b>Number of columns (Genotype)</b> | 2  |  |  |  |  |
| <b>Number of rows (Injury)</b>      | 2  |  |  |  |  |
| <b>Number of values</b>             | 16 |  |  |  |  |

2way ANOVA of 5HT cortex

| Table Analyzed                         | 5HT cortex           |         |                                     |                   |              |
|----------------------------------------|----------------------|---------|-------------------------------------|-------------------|--------------|
| <b>Two-way ANOVA</b>                   | Ordinary             |         |                                     |                   |              |
| <b>Alpha</b>                           | 0,05                 |         |                                     |                   |              |
| <b>Source of Variation</b>             | % of total variation | P value | P value summary                     |                   | Significant? |
| <b>Interaction</b>                     | 0,2273               | 0,7059  | ns                                  |                   | No           |
| <b>Injury</b>                          | 51,79                | 0,0004  | ***                                 |                   | Yes          |
| <b>Genotype</b>                        | 36,10                | 0,0012  | **                                  |                   | Yes          |
| <b>ANOVA table</b>                     | SS                   | DF      | MS                                  | F (DFn, DFd)      | P value      |
| <b>Interaction</b>                     | 21194834             | 1       | 21194834                            | F (1, 8) = 0.1530 | P=0.7059     |
| <b>Injury</b>                          | 4830254644           | 1       | 4830254644                          | F (1, 8) = 34.86  | P=0.0004     |
| <b>Genotype</b>                        | 3366372064           | 1       | 3366372064                          | F (1, 8) = 24.30  | P=0.0012     |
| <b>Residual</b>                        | 1108371191           | 8       | 138546399                           |                   |              |
| <b>Difference between column means</b> |                      |         |                                     |                   |              |
| <b>Mean of WT</b>                      | 98341                |         |                                     |                   |              |
| <b>Mean of APP-SWE</b>                 | 64842                |         |                                     |                   |              |
| <b>Difference between means</b>        | 33498                |         |                                     |                   |              |
| <b>SE of difference</b>                | 6796                 |         |                                     |                   |              |
| <b>95% CI of difference</b>            | 17827 to 49169       |         |                                     |                   |              |
| <b>Difference between row means</b>    |                      |         |                                     |                   |              |
| <b>Mean of Sham</b>                    | 101654               |         |                                     |                   |              |
| <b>Mean of mTBI</b>                    | 61529                |         |                                     |                   |              |
| <b>Difference between means</b>        | 40126                |         |                                     |                   |              |
| <b>SE of difference</b>                | 6796                 |         |                                     |                   |              |
| <b>95% CI of difference</b>            | 24455 to 55797       |         |                                     |                   |              |
| <b>Interaction CI</b>                  |                      |         |                                     |                   |              |
| <b>Mean diff, A1 - B1</b>              | 30840                |         |                                     |                   |              |
| <b>Mean diff, A2 - B2</b>              | 36156                |         |                                     |                   |              |
| <b>(A1 -B1) - (A2 - B2)</b>            | -5316                |         |                                     |                   |              |
| <b>95% CI of difference</b>            | -36658 to 26026      |         |                                     |                   |              |
| <b>(B1 - A1) - (B2 - A2)</b>           | 5316                 |         |                                     |                   |              |
| <b>95% CI of difference</b>            | -26026 to 36658      |         |                                     |                   |              |
| <b>Normality of Residuals</b>          |                      |         |                                     |                   |              |
| <b>Test name</b>                       | Statistics           | P value | Passed normality test (alpha=0.05)? | P value summary   |              |
| <b>D'Agostino-Pearson omnibus (K2)</b> | 2,403                | 0,3008  | Yes                                 | ns                |              |
| <b>Anderson-Darling (A2*)</b>          | 0,3764               | 0,3513  | Yes                                 | ns                |              |
| <b>Shapiro-Wilk (W)</b>                | 0,9222               | 0,3044  | Yes                                 | ns                |              |
| <b>Kolmogorov-Smirnov (distance)</b>   | 0,1711               | 0,1000  | Yes                                 | ns                |              |
| <b>Data summary</b>                    |                      |         |                                     |                   |              |

|                                     |    |  |  |  |  |
|-------------------------------------|----|--|--|--|--|
| <b>Number of columns (Genotype)</b> | 2  |  |  |  |  |
| <b>Number of rows (Injury)</b>      | 2  |  |  |  |  |
| <b>Number of values</b>             | 12 |  |  |  |  |

2way ANOVA of 5HT hipp

| Table Analyzed                         | 5HT hipp             |         |                                     |                  |          |
|----------------------------------------|----------------------|---------|-------------------------------------|------------------|----------|
| <b>Two-way ANOVA</b>                   | Ordinary             |         |                                     |                  |          |
| <b>Alpha</b>                           | 0,05                 |         |                                     |                  |          |
| <b>Source of Variation</b>             | % of total variation | P value | P value summary                     | Significant?     |          |
| <b>Interaction</b>                     | 12,70                | 0,0914  | ns                                  | No               |          |
| <b>Injury</b>                          | 10,67                | 0,1168  | ns                                  | No               |          |
| <b>Genotype</b>                        | 49,01                | 0,0055  | **                                  | Yes              |          |
| <b>ANOVA table</b>                     | SS                   | DF      | MS                                  | F (DFn, DFd)     | P value  |
| <b>Interaction</b>                     | 2733073668           | 1       | 2733073668                          | F (1, 8) = 3.678 | P=0.0914 |
| <b>Injury</b>                          | 2296419101           | 1       | 2296419101                          | F (1, 8) = 3.091 | P=0.1168 |
| <b>Genotype</b>                        | 10546404413          | 1       | 10546404413                         | F (1, 8) = 14.19 | P=0.0055 |
| <b>Residual</b>                        | 5944130395           | 8       | 743016299                           |                  |          |
| <b>Difference between column means</b> |                      |         |                                     |                  |          |
| <b>Mean of WT</b>                      | 116963               |         |                                     |                  |          |
| <b>Mean of APP-SWE</b>                 | 176254               |         |                                     |                  |          |
| <b>Difference between means</b>        | -59291               |         |                                     |                  |          |
| <b>SE of difference</b>                | 15738                |         |                                     |                  |          |
| <b>95% CI of difference</b>            | -95582 to -23000     |         |                                     |                  |          |
| <b>Difference between row means</b>    |                      |         |                                     |                  |          |
| <b>Mean of Sham</b>                    | 160442               |         |                                     |                  |          |
| <b>Mean of mTBI</b>                    | 132775               |         |                                     |                  |          |
| <b>Difference between means</b>        | 27667                |         |                                     |                  |          |
| <b>SE of difference</b>                | 15738                |         |                                     |                  |          |
| <b>95% CI of difference</b>            | -8624 to 63958       |         |                                     |                  |          |
| <b>Interaction CI</b>                  |                      |         |                                     |                  |          |
| <b>Mean diff, A1 - B1</b>              | -89475               |         |                                     |                  |          |
| <b>Mean diff, A2 - B2</b>              | -29108               |         |                                     |                  |          |
| <b>(A1 - B1) - (A2 - B2)</b>           | -60366               |         |                                     |                  |          |
| <b>95% CI of difference</b>            | -132948 to 12216     |         |                                     |                  |          |
| <b>(B1 - A1) - (B2 - A2)</b>           | 60366                |         |                                     |                  |          |
| <b>95% CI of difference</b>            | -12216 to 132948     |         |                                     |                  |          |
| <b>Normality of Residuals</b>          |                      |         |                                     |                  |          |
| <b>Test name</b>                       | Statistics           | P value | Passed normality test (alpha=0.05)? | P value summary  |          |
| <b>D'Agostino-Pearson omnibus (K2)</b> | 1,393                | 0,4982  | Yes                                 | ns               |          |
| <b>Anderson-Darling (A2*)</b>          | 0,2786               | 0,5815  | Yes                                 | ns               |          |
| <b>Shapiro-Wilk (W)</b>                | 0,9451               | 0,5673  | Yes                                 | ns               |          |
| <b>Kolmogorov-Smirnov (distance)</b>   | 0,1469               | 0,1000  | Yes                                 | ns               |          |
| <b>Data summary</b>                    |                      |         |                                     |                  |          |

|                                     |    |  |  |  |  |
|-------------------------------------|----|--|--|--|--|
| <b>Number of columns (Genotype)</b> | 2  |  |  |  |  |
| <b>Number of rows (Injury)</b>      | 2  |  |  |  |  |
| <b>Number of values</b>             | 12 |  |  |  |  |

2way ANOVA of 5HIAA cortex

| Compare cell means regardless of rows and columns |            |                    |                  |             |                  |    |        |       |
|---------------------------------------------------|------------|--------------------|------------------|-------------|------------------|----|--------|-------|
| Number of families                                | 1          |                    |                  |             |                  |    |        |       |
| Number of comparisons per family                  | 6          |                    |                  |             |                  |    |        |       |
| Alpha                                             | 0,05       |                    |                  |             |                  |    |        |       |
|                                                   |            |                    |                  |             |                  |    |        |       |
| <b>Tukey's multiple comparisons test</b>          | Mean Diff. | 95.00% CI of diff. | Below threshold? | Summary     | Adjusted P Value |    |        |       |
|                                                   |            |                    |                  |             |                  |    |        |       |
| Sham:WT vs. Sham:APP-SWE                          | 2718       | -1751 to 7187      | No               | ns          | 0,2824           |    |        |       |
| Sham:WT vs. mTBI:WT                               | 760,8      | -3708 to 5230      | No               | ns          | 0,9453           |    |        |       |
| Sham:WT vs. mTBI:APP-SWE                          | 7200       | 2731 to 11669      | Yes              | **          | 0,0038           |    |        |       |
| Sham:APP-SWE vs. mTBI:WT                          | -1957      | -6427 to 2512      | No               | ns          | 0,5315           |    |        |       |
| Sham:APP-SWE vs. mTBI:APP-SWE                     | 4481       | 12.29 to 8950      | Yes              | *           | 0,0494           |    |        |       |
| mTBI:WT vs. mTBI:APP-SWE                          | 6439       | 1970 to 10908      | Yes              | **          | 0,0075           |    |        |       |
|                                                   |            |                    |                  |             |                  |    |        |       |
|                                                   |            |                    |                  |             |                  |    |        |       |
| <b>Test details</b>                               | Mean 1     | Mean 2             | Mean Diff.       | SE of diff. | N1               | N2 | q      | DF    |
|                                                   |            |                    |                  |             |                  |    |        |       |
| Sham:WT vs. Sham:APP-SWE                          | 12371      | 9653               | 2718             | 1396        | 3                | 3  | 2,755  | 8,000 |
| Sham:WT vs. mTBI:WT                               | 12371      | 11610              | 760,8            | 1396        | 3                | 3  | 0,7710 | 8,000 |
| Sham:WT vs. mTBI:APP-SWE                          | 12371      | 5171               | 7200             | 1396        | 3                | 3  | 7,296  | 8,000 |
| Sham:APP-SWE vs. mTBI:WT                          | 9653       | 11610              | -1957            | 1396        | 3                | 3  | 1,984  | 8,000 |
| Sham:APP-SWE vs. mTBI:APP-SWE                     | 9653       | 5171               | 4481             | 1396        | 3                | 3  | 4,541  | 8,000 |
| mTBI:WT vs. mTBI:APP-SWE                          | 11610      | 5171               | 6439             | 1396        | 3                | 3  | 6,525  | 8,000 |

2way ANOVA of 5HIAA hipp

| Compare cell means regardless of rows and columns |            |                    |                  |             |                  |    |       |       |
|---------------------------------------------------|------------|--------------------|------------------|-------------|------------------|----|-------|-------|
| Number of families                                | 1          |                    |                  |             |                  |    |       |       |
| Number of comparisons per family                  | 6          |                    |                  |             |                  |    |       |       |
| Alpha                                             | 0,05       |                    |                  |             |                  |    |       |       |
|                                                   |            |                    |                  |             |                  |    |       |       |
| Tukey's multiple comparisons test                 | Mean Diff. | 95.00% CI of diff. | Below threshold? | Summary     | Adjusted P Value |    |       |       |
| Sham:WT vs. Sham:APP-SWE                          | -15237     | -23328 to -7146    | Yes              | **          | 0,0014           |    |       |       |
| Sham:WT vs. mTBI:WT                               | -9070      | -17161 to -979.3   | Yes              | *           | 0,0291           |    |       |       |
| Sham:WT vs. mTBI:APP-SWE                          | -3921      | -12012 to 4170     | No               | ns          | 0,4537           |    |       |       |
| Sham:APP-SWE vs. mTBI:WT                          | 6167       | -1924 to 14258     | No               | ns          | 0,1460           |    |       |       |
| Sham:APP-SWE vs. mTBI:APP-SWE                     | 11316      | 3225 to 19407      | Yes              | **          | 0,0089           |    |       |       |
| mTBI:WT vs. mTBI:APP-SWE                          | 5150       | -2942 to 13241     | No               | ns          | 0,2513           |    |       |       |
|                                                   |            |                    |                  |             |                  |    |       |       |
| Test details                                      | Mean 1     | Mean 2             | Mean Diff.       | SE of diff. | N1               | N2 | q     | DF    |
| Sham:WT vs. Sham:APP-SWE                          | 28276      | 43513              | -15237           | 2527        | 3                | 3  | 8,529 | 8,000 |
| Sham:WT vs. mTBI:WT                               | 28276      | 37346              | -9070            | 2527        | 3                | 3  | 5,077 | 8,000 |
| Sham:WT vs. mTBI:APP-SWE                          | 28276      | 32197              | -3921            | 2527        | 3                | 3  | 2,195 | 8,000 |
| Sham:APP-SWE vs. mTBI:WT                          | 43513      | 37346              | 6167             | 2527        | 3                | 3  | 3,452 | 8,000 |
| Sham:APP-SWE vs. mTBI:APP-SWE                     | 43513      | 32197              | 11316            | 2527        | 3                | 3  | 6,334 | 8,000 |
| mTBI:WT vs. mTBI:APP-SWE                          | 37346      | 32197              | 5150             | 2527        | 3                | 3  | 2,882 | 8,000 |

2way ANOVA of OA5HT cortex MSI

| Table Analyzed                         | OA5HT cortex MSI     |         |                                     |                  |                 |
|----------------------------------------|----------------------|---------|-------------------------------------|------------------|-----------------|
| <b>Two-way ANOVA</b>                   | Ordinary             |         |                                     |                  |                 |
| <b>Alpha</b>                           | 0,05                 |         |                                     |                  |                 |
| <b>Source of Variation</b>             | % of total variation | P value | P value summary                     |                  | Significant?    |
| <b>Interaction</b>                     | 7,126                | 0,0787  | ns                                  |                  | No              |
| <b>Injury</b>                          | 28,58                | 0,0038  | **                                  |                  | Yes             |
| <b>Genotype</b>                        | 50,26                | 0,0007  | ***                                 |                  | Yes             |
| <b>ANOVA table</b>                     | SS                   | DF      | MS                                  | F (DFn, DFd)     | P value         |
| <b>Interaction</b>                     | 398747               | 1       | 398747                              | F (1, 8) = 4.061 | P=0.0787        |
| <b>Injury</b>                          | 1598982              | 1       | 1598982                             | F (1, 8) = 16.28 | P=0.0038        |
| <b>Genotype</b>                        | 2812067              | 1       | 2812067                             | F (1, 8) = 28.64 | P=0.0007        |
| <b>Residual</b>                        | 785589               | 8       | 98199                               |                  |                 |
| <b>Difference between column means</b> |                      |         |                                     |                  |                 |
| <b>Mean of WT</b>                      | 1910                 |         |                                     |                  |                 |
| <b>Mean of APP-SWE</b>                 | 941,6                |         |                                     |                  |                 |
| <b>Difference between means</b>        | 968,2                |         |                                     |                  |                 |
| <b>SE of difference</b>                | 180,9                |         |                                     |                  |                 |
| <b>95% CI of difference</b>            | 551.0 to 1385        |         |                                     |                  |                 |
| <b>Difference between row means</b>    |                      |         |                                     |                  |                 |
| <b>Mean of Sham</b>                    | 1061                 |         |                                     |                  |                 |
| <b>Mean of mTBI</b>                    | 1791                 |         |                                     |                  |                 |
| <b>Difference between means</b>        | -730,1               |         |                                     |                  |                 |
| <b>SE of difference</b>                | 180,9                |         |                                     |                  |                 |
| <b>95% CI of difference</b>            | -1147 to -312.9      |         |                                     |                  |                 |
| <b>Interaction CI</b>                  |                      |         |                                     |                  |                 |
| <b>Mean diff, A1 - B1</b>              | 603,6                |         |                                     |                  |                 |
| <b>Mean diff, A2 - B2</b>              | 1333                 |         |                                     |                  |                 |
| <b>(A1 -B1) - (A2 - B2)</b>            | -729,2               |         |                                     |                  |                 |
| <b>95% CI of difference</b>            | -1564 to 105.3       |         |                                     |                  |                 |
| <b>(B1 - A1) - (B2 - A2)</b>           | 729,2                |         |                                     |                  |                 |
| <b>95% CI of difference</b>            | -105.3 to 1564       |         |                                     |                  |                 |
| <b>Normality of Residuals</b>          |                      |         |                                     |                  |                 |
| <b>Test name</b>                       | Statistics           | P value | Passed normality test (alpha=0.05)? |                  | P value summary |
| <b>D'Agostino-Pearson omnibus (K2)</b> | 0,06299              | 0,9690  | Yes                                 |                  | ns              |
| <b>Anderson-Darling (A2*)</b>          | 0,1739               | 0,9034  | Yes                                 |                  | ns              |
| <b>Shapiro-Wilk (W)</b>                | 0,9736               | 0,9448  | Yes                                 |                  | ns              |
| <b>Kolmogorov-Smirnov (distance)</b>   | 0,1111               | 0,1000  | Yes                                 |                  | ns              |
| <b>Data summary</b>                    |                      |         |                                     |                  |                 |

|                                     |    |  |  |  |  |
|-------------------------------------|----|--|--|--|--|
| <b>Number of columns (Genotype)</b> | 2  |  |  |  |  |
| <b>Number of rows (Injury)</b>      | 2  |  |  |  |  |
| <b>Number of values</b>             | 12 |  |  |  |  |

2way ANOVA of OA5HT hipp MSI

| Table Analyzed                         | OA5HT hipp MSI       |         |                                     |                   |              |
|----------------------------------------|----------------------|---------|-------------------------------------|-------------------|--------------|
| <b>Two-way ANOVA</b>                   | Ordinary             |         |                                     |                   |              |
| <b>Alpha</b>                           | 0,05                 |         |                                     |                   |              |
| <b>Source of Variation</b>             | % of total variation | P value | P value summary                     |                   | Significant? |
| <b>Interaction</b>                     | 3,522                | 0,3953  | ns                                  |                   | No           |
| <b>Injury</b>                          | 0,8273               | 0,6748  | ns                                  |                   | No           |
| <b>Genotype</b>                        | 60,73                | 0,0058  | **                                  |                   | Yes          |
| <b>ANOVA table</b>                     | SS                   | DF      | MS                                  | F (DFn, DFd)      | P value      |
| <b>Interaction</b>                     | 62538                | 1       | 62538                               | F (1, 8) = 0.8068 | P=0.3953     |
| <b>Injury</b>                          | 14690                | 1       | 14690                               | F (1, 8) = 0.1895 | P=0.6748     |
| <b>Genotype</b>                        | 1078354              | 1       | 1078354                             | F (1, 8) = 13.91  | P=0.0058     |
| <b>Residual</b>                        | 620144               | 8       | 77518                               |                   |              |
| <b>Difference between column means</b> |                      |         |                                     |                   |              |
| <b>Mean of WT</b>                      | 1762                 |         |                                     |                   |              |
| <b>Mean of APP-SWE</b>                 | 1163                 |         |                                     |                   |              |
| <b>Difference between means</b>        | 599,5                |         |                                     |                   |              |
| <b>SE of difference</b>                | 160,7                |         |                                     |                   |              |
| <b>95% CI of difference</b>            | 228.9 to 970.2       |         |                                     |                   |              |
| <b>Difference between row means</b>    |                      |         |                                     |                   |              |
| <b>Mean of Sham</b>                    | 1497                 |         |                                     |                   |              |
| <b>Mean of mTBI</b>                    | 1428                 |         |                                     |                   |              |
| <b>Difference between means</b>        | 69,98                |         |                                     |                   |              |
| <b>SE of difference</b>                | 160,7                |         |                                     |                   |              |
| <b>95% CI of difference</b>            | -300.7 to 440.7      |         |                                     |                   |              |
| <b>Interaction CI</b>                  |                      |         |                                     |                   |              |
| <b>Mean diff, A1 - B1</b>              | 455,2                |         |                                     |                   |              |
| <b>Mean diff, A2 - B2</b>              | 743,9                |         |                                     |                   |              |
| <b>(A1 - B1) - (A2 - B2)</b>           | -288,8               |         |                                     |                   |              |
| <b>95% CI of difference</b>            | -1030 to 452.6       |         |                                     |                   |              |
| <b>(B1 - A1) - (B2 - A2)</b>           | 288,8                |         |                                     |                   |              |
| <b>95% CI of difference</b>            | -452.6 to 1030       |         |                                     |                   |              |
| <b>Normality of Residuals</b>          |                      |         |                                     |                   |              |
| <b>Test name</b>                       | Statistics           | P value | Passed normality test (alpha=0.05)? | P value summary   |              |
| <b>D'Agostino-Pearson omnibus (K2)</b> | 2,457                | 0,2928  | Yes                                 | ns                |              |
| <b>Anderson-Darling (A2*)</b>          | 0,5893               | 0,0977  | Yes                                 | ns                |              |
| <b>Shapiro-Wilk (W)</b>                | 0,8684               | 0,0624  | Yes                                 | ns                |              |
| <b>Kolmogorov-Smirnov (distance)</b>   | 0,1512               | 0,1000  | Yes                                 | ns                |              |
| <b>Data summary</b>                    |                      |         |                                     |                   |              |

|                                     |    |  |  |  |  |
|-------------------------------------|----|--|--|--|--|
| <b>Number of columns (Genotype)</b> | 2  |  |  |  |  |
| <b>Number of rows (Injury)</b>      | 2  |  |  |  |  |
| <b>Number of values</b>             | 12 |  |  |  |  |

2way ANOVA of Gene 5HT2a cortex

| Table Analyzed                         | Gene 5HT2a cortex    |         |                                     |                  |                 |
|----------------------------------------|----------------------|---------|-------------------------------------|------------------|-----------------|
| <b>Two-way ANOVA</b>                   | Ordinary             |         |                                     |                  |                 |
| <b>Alpha</b>                           | 0,05                 |         |                                     |                  |                 |
| <b>Source of Variation</b>             | % of total variation | P value | P value summary                     |                  | Significant?    |
| <b>Interaction</b>                     | 13,14                | 0,0043  | **                                  |                  | Yes             |
| <b>Injury</b>                          | 41,68                | 0,0001  | ***                                 |                  | Yes             |
| <b>Genotype</b>                        | 38,40                | 0,0001  | ***                                 |                  | Yes             |
| <b>ANOVA table</b>                     | SS                   | DF      | MS                                  | F (DFn, DFd)     | P value         |
| <b>Interaction</b>                     | 0,08100              | 1       | 0,08100                             | F (1, 8) = 15.49 | P=0.0043        |
| <b>Injury</b>                          | 0,2569               | 1       | 0,2569                              | F (1, 8) = 49.15 | P=0.0001        |
| <b>Genotype</b>                        | 0,2367               | 1       | 0,2367                              | F (1, 8) = 45.28 | P=0.0001        |
| <b>Residual</b>                        | 0,04182              | 8       | 0,005227                            |                  |                 |
| <b>Difference between column means</b> |                      |         |                                     |                  |                 |
| <b>Mean of WT</b>                      | 0,9358               |         |                                     |                  |                 |
| <b>Mean of APP-SWE</b>                 | 1,217                |         |                                     |                  |                 |
| <b>Difference between means</b>        | -0,2809              |         |                                     |                  |                 |
| <b>SE of difference</b>                | 0,04174              |         |                                     |                  |                 |
| <b>95% CI of difference</b>            | -0.3772 to -0.1846   |         |                                     |                  |                 |
| <b>Difference between row means</b>    |                      |         |                                     |                  |                 |
| <b>Mean of Sham</b>                    | 1,223                |         |                                     |                  |                 |
| <b>Mean of mTBI</b>                    | 0,9300               |         |                                     |                  |                 |
| <b>Difference between means</b>        | 0,2926               |         |                                     |                  |                 |
| <b>SE of difference</b>                | 0,04174              |         |                                     |                  |                 |
| <b>95% CI of difference</b>            | 0.1964 to 0.3889     |         |                                     |                  |                 |
| <b>Interaction CI</b>                  |                      |         |                                     |                  |                 |
| <b>Mean diff, A1 - B1</b>              | -0,4452              |         |                                     |                  |                 |
| <b>Mean diff, A2 - B2</b>              | -0,1166              |         |                                     |                  |                 |
| <b>(A1 -B1) - (A2 - B2)</b>            | -0,3286              |         |                                     |                  |                 |
| <b>95% CI of difference</b>            | -0.5211 to -0.1361   |         |                                     |                  |                 |
| <b>(B1 - A1) - (B2 - A2)</b>           | 0,3286               |         |                                     |                  |                 |
| <b>95% CI of difference</b>            | 0.1361 to 0.5211     |         |                                     |                  |                 |
| <b>Normality of Residuals</b>          |                      |         |                                     |                  |                 |
| <b>Test name</b>                       | Statistics           | P value | Passed normality test (alpha=0.05)? |                  | P value summary |
| <b>D'Agostino-Pearson omnibus (K2)</b> | 2,032                | 0,3621  | Yes                                 |                  | ns              |
| <b>Anderson-Darling (A2*)</b>          | 0,3245               | 0,4732  | Yes                                 |                  | ns              |
| <b>Shapiro-Wilk (W)</b>                | 0,9307               | 0,3873  | Yes                                 |                  | ns              |
| <b>Kolmogorov-Smirnov (distance)</b>   | 0,1690               | 0,1000  | Yes                                 |                  | ns              |
| <b>Data summary</b>                    |                      |         |                                     |                  |                 |

|                                     |    |  |  |  |  |
|-------------------------------------|----|--|--|--|--|
| <b>Number of columns (Genotype)</b> | 2  |  |  |  |  |
| <b>Number of rows (Injury)</b>      | 2  |  |  |  |  |
| <b>Number of values</b>             | 12 |  |  |  |  |

2way ANOVA of Gene 5HT2a hipp

| Compare cell means regardless of rows and columns |                           |                       |                           |             |                  |    |        |       |
|---------------------------------------------------|---------------------------|-----------------------|---------------------------|-------------|------------------|----|--------|-------|
| <b>Number of families</b>                         | 1                         |                       |                           |             |                  |    |        |       |
| <b>Number of comparisons per family</b>           | 6                         |                       |                           |             |                  |    |        |       |
| <b>Alpha</b>                                      | 0,05                      |                       |                           |             |                  |    |        |       |
| <b>Tukey's multiple comparisons test</b>          | Predicted (LS) mean diff. | 95.00% CI of diff.    | Below threshold?          | Summary     | Adjusted P Value |    |        |       |
| <b>Sham:WT vs. Sham:APP-SWE</b>                   | 0,4285                    | -0.1428 to 0.9998     | No                        | ns          | 0,1845           |    |        |       |
| <b>Sham:WT vs. mTBI:WT</b>                        | 0,05278                   | -0.5917 to 0.6973     | No                        | ns          | 0,9955           |    |        |       |
| <b>Sham:WT vs. mTBI:APP-SWE</b>                   | 0,4716                    | -0.09973 to 1.043     | No                        | ns          | 0,1275           |    |        |       |
| <b>Sham:APP-SWE vs. mTBI:WT</b>                   | -0,3757                   | -0.9470 to 0.1956     | No                        | ns          | 0,2799           |    |        |       |
| <b>Sham:APP-SWE vs. mTBI:APP-SWE</b>              | 0,04307                   | -0.4441 to 0.5303     | No                        | ns          | 0,9943           |    |        |       |
| <b>mTBI:WT vs. mTBI:APP-SWE</b>                   | 0,4188                    | -0.1525 to 0.9901     | No                        | ns          | 0,1999           |    |        |       |
| <b>Test details</b>                               | Predicted (LS) mean 1     | Predicted (LS) mean 2 | Predicted (LS) mean diff. | SE of diff. | N1               | N2 | q      | DF    |
| <b>Sham:WT vs. Sham:APP-SWE</b>                   | 1,000                     | 0,5715                | 0,4285                    | 0,2021      | 4                | 7  | 2,998  | 18,00 |
| <b>Sham:WT vs. mTBI:WT</b>                        | 1,000                     | 0,9472                | 0,05278                   | 0,2280      | 4                | 4  | 0,3273 | 18,00 |
| <b>Sham:WT vs. mTBI:APP-SWE</b>                   | 1,000                     | 0,5284                | 0,4716                    | 0,2021      | 4                | 7  | 3,299  | 18,00 |
| <b>Sham:APP-SWE vs. mTBI:WT</b>                   | 0,5715                    | 0,9472                | -0,3757                   | 0,2021      | 7                | 4  | 2,629  | 18,00 |
| <b>Sham:APP-SWE vs. mTBI:APP-SWE</b>              | 0,5715                    | 0,5284                | 0,04307                   | 0,1724      | 7                | 7  | 0,3533 | 18,00 |
| <b>mTBI:WT vs. mTBI:APP-SWE</b>                   | 0,9472                    | 0,5284                | 0,4188                    | 0,2021      | 4                | 7  | 2,930  | 18,00 |

2way ANOVA of 5HT2a:CB1 cortex

| Table Analyzed                         | 5HT2a/CB1 cortex     |         |                                     |  |                           |
|----------------------------------------|----------------------|---------|-------------------------------------|--|---------------------------|
| <b>Two-way ANOVA</b>                   | Ordinary             |         |                                     |  |                           |
| <b>Alpha</b>                           | 0,05                 |         |                                     |  |                           |
| <b>Source of Variation</b>             | % of total variation | P value | P value summary                     |  | Significant?              |
| <b>Interaction</b>                     | 38,99                | <0.0001 | ****                                |  | Yes                       |
| <b>Injury</b>                          | 32,34                | <0.0001 | ****                                |  | Yes                       |
| <b>Genotype</b>                        | 28,37                | <0.0001 | ****                                |  | Yes                       |
| <b>ANOVA table</b>                     | SS                   | DF      | MS                                  |  | F (DFn, DFd) P value      |
| <b>Interaction</b>                     | 2,444                | 1       | 2,444                               |  | F (1, 4) = 505.4 P<0.0001 |
| <b>Injury</b>                          | 2,027                | 1       | 2,027                               |  | F (1, 4) = 419.3 P<0.0001 |
| <b>Genotype</b>                        | 1,778                | 1       | 1,778                               |  | F (1, 4) = 367.7 P<0.0001 |
| <b>Residual</b>                        | 0,01934              | 4       | 0,004835                            |  |                           |
| <b>Difference between column means</b> |                      |         |                                     |  |                           |
| <b>Mean of WT</b>                      | 0,9507               |         |                                     |  |                           |
| <b>Mean of APP-SWE</b>                 | 1,894                |         |                                     |  |                           |
| <b>Difference between means</b>        | -0,9429              |         |                                     |  |                           |
| <b>SE of difference</b>                | 0,04917              |         |                                     |  |                           |
| <b>95% CI of difference</b>            | -1.079 to -0.8064    |         |                                     |  |                           |
| <b>Difference between row means</b>    |                      |         |                                     |  |                           |
| <b>Mean of Sham</b>                    | 0,9188               |         |                                     |  |                           |
| <b>Mean of mTBI</b>                    | 1,926                |         |                                     |  |                           |
| <b>Difference between means</b>        | -1,007               |         |                                     |  |                           |
| <b>SE of difference</b>                | 0,04917              |         |                                     |  |                           |
| <b>95% CI of difference</b>            | -1.143 to -0.8703    |         |                                     |  |                           |
| <b>Interaction CI</b>                  |                      |         |                                     |  |                           |
| <b>Mean diff, A1 - B1</b>              | 0,1625               |         |                                     |  |                           |
| <b>Mean diff, A2 - B2</b>              | -2,048               |         |                                     |  |                           |
| <b>(A1 -B1) - (A2 - B2)</b>            | 2,211                |         |                                     |  |                           |
| <b>95% CI of difference</b>            | 1.938 to 2.484       |         |                                     |  |                           |
| <b>(B1 - A1) - (B2 - A2)</b>           | -2,211               |         |                                     |  |                           |
| <b>95% CI of difference</b>            | -2.484 to -1.938     |         |                                     |  |                           |
| <b>Normality of Residuals</b>          |                      |         |                                     |  |                           |
| <b>Test name</b>                       | Statistics           | P value | Passed normality test (alpha=0.05)? |  | P value summary           |
| <b>D'Agostino-Pearson omnibus (K2)</b> | 0,3762               | 0,8285  | Yes                                 |  | ns                        |
| <b>Anderson-Darling (A2*)</b>          | 0,3009               | 0,5018  | Yes                                 |  | ns                        |
| <b>Shapiro-Wilk (W)</b>                | 0,9121               | 0,3693  | Yes                                 |  | ns                        |
| <b>Kolmogorov-Smirnov (distance)</b>   | 0,1518               | 0,1000  | Yes                                 |  | ns                        |
| <b>Data summary</b>                    |                      |         |                                     |  |                           |

|                                     |   |  |  |  |  |
|-------------------------------------|---|--|--|--|--|
| <b>Number of columns (Genotype)</b> | 2 |  |  |  |  |
| <b>Number of rows (Injury)</b>      | 2 |  |  |  |  |
| <b>Number of values</b>             | 8 |  |  |  |  |
