# Supplementary material for: Early biomarkers in the presymptomatic phase of cognitive impairment: changes in the endocannabinoidome and serotonergic pathways in Alzheimer's-prone mice after mTBI
Source: Springer Nature journal article supplement (doi:10.1186/s40478-024-01820-0), 2024-07-12

**A**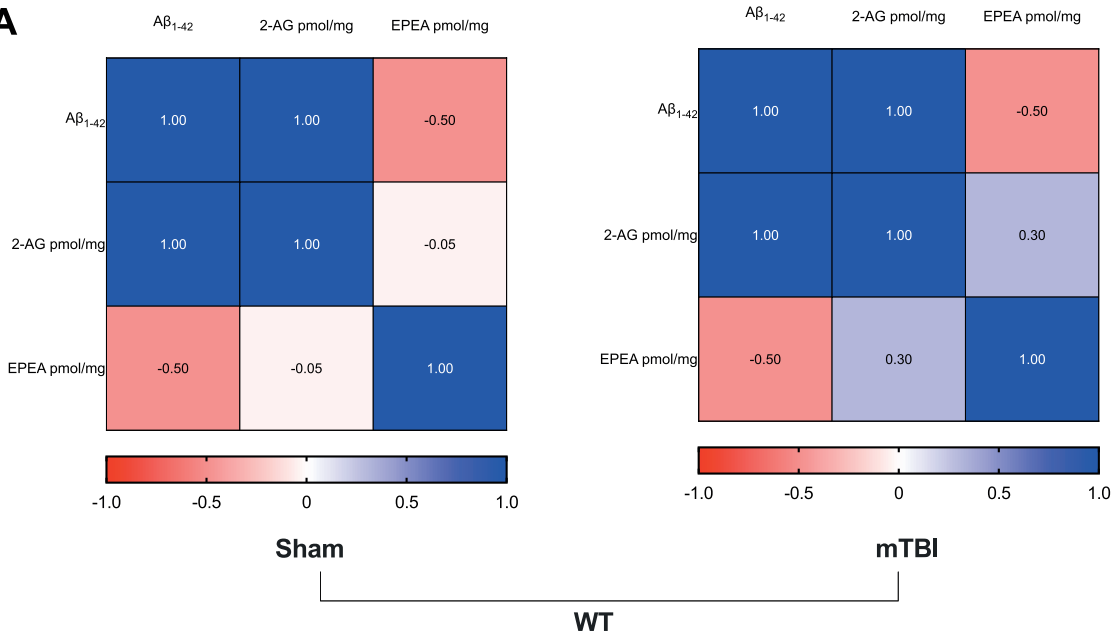**B**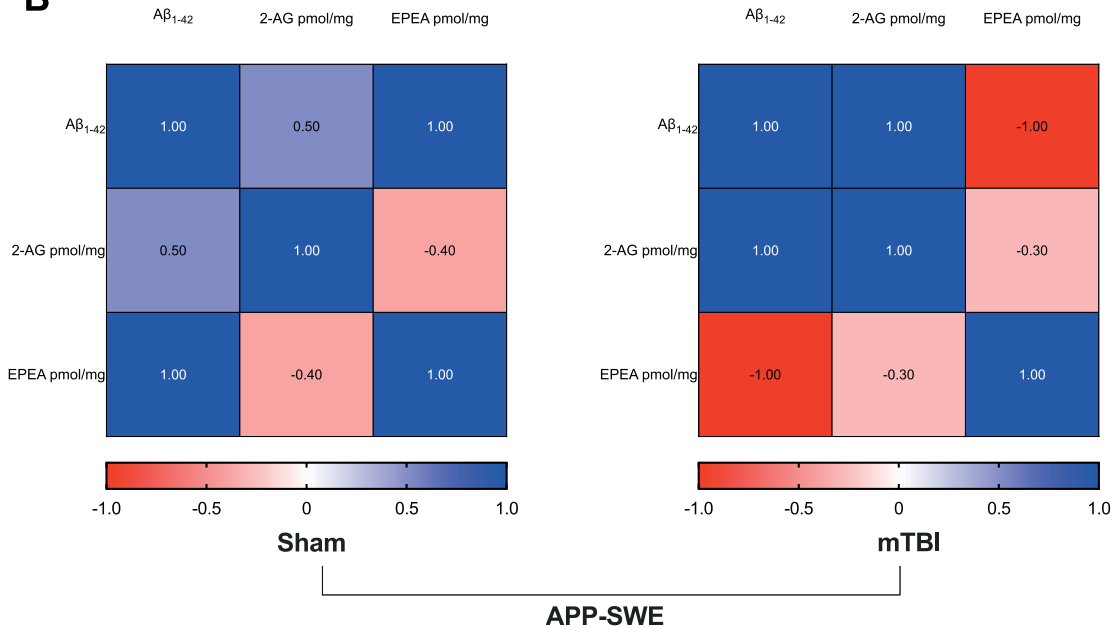

Supplement: MOESM3 [file 40478_2024_1820_MOESM3_ESM.pdf]
