# Supplementary material for: Early biomarkers in the presymptomatic phase of cognitive impairment: changes in the endocannabinoidome and serotonergic pathways in Alzheimer's-prone mice after mTBI
Source: Springer Nature journal article supplement (doi:10.1186/s40478-024-01820-0), 2024-07-12
Supplement: MOESM5 [file 40478_2024_1820_MOESM5_ESM.pdf]

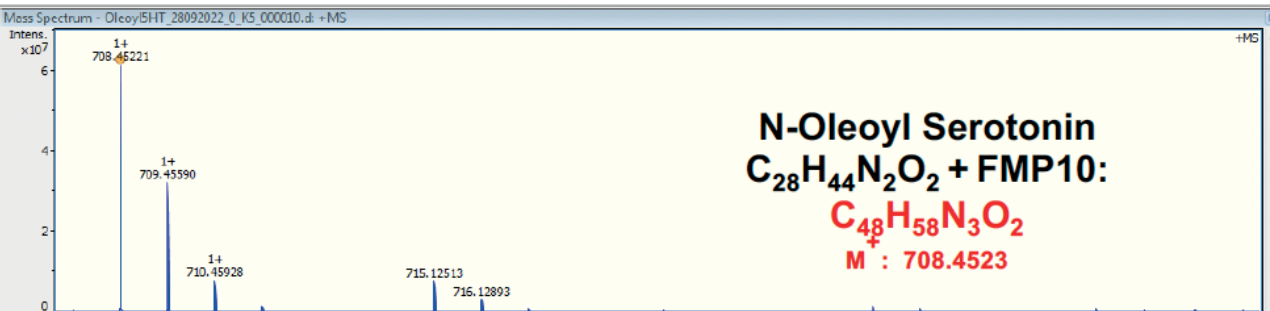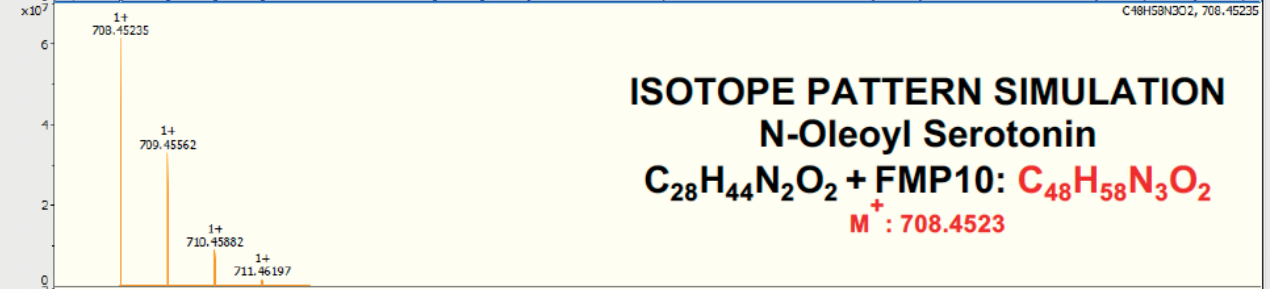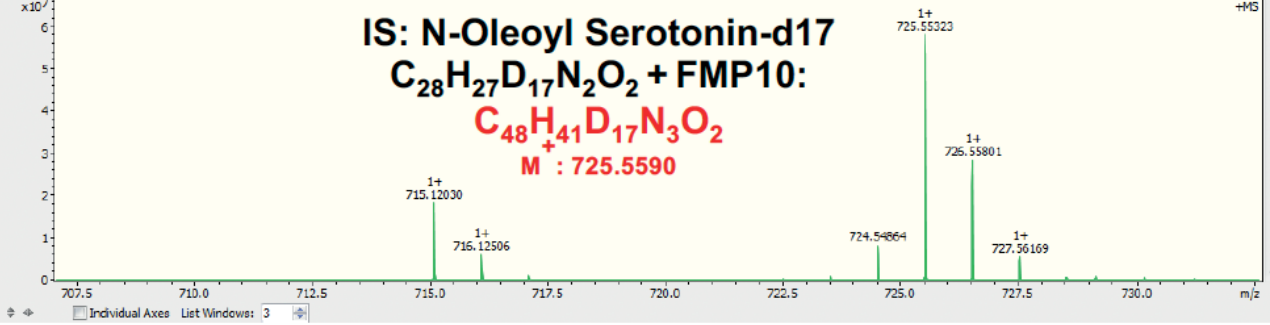

SmartFormula Manually

Lower formula:

Upper formula:

Note: for m < 2000 the elements C, H, N, and O are considered implicitly.

Adducts, pos.   Collect adducts

Adducts, neg.

Measured m/z  Tolerance:  ppm Charge:

| Meas. m/z | # | Ion Formula                                                   | Score  | m/z       | err [ppm] | Mean err [ppm] | mSigma |
|-----------|---|---------------------------------------------------------------|--------|-----------|-----------|----------------|--------|
| 708.45221 | 1 | C <sub>48</sub> H <sub>58</sub> N <sub>3</sub> O <sub>2</sub> | 100.00 | 708.45235 | 0.20      | -0.43          | 13.1   |

Automatically locate monoisotopic peak Maximum number of formulae

Check rings plus double bonds Minimum  Maximum

Filter H/C element ratio Minimum H/C:  Maximum H/C:

Estimate carbon number  Generate immediately
